# Supplementary material for: Mechanistic insight into Ni(i)-catalyzed regioselective alkene hydroarylation: is it carbonickelation or hydronickelation?
Source: Royal Society of Chemistry journal article supplement (doi:10.1039/d4qo01579g), 2024-01-01
Supplement: d4qo01579g1.pdf [file d4qo01579g1.pdf]

## Electronic Supplementary Information

### Mechanistic Insight into Ni(I)-Catalyzed Regioselective Alkene Hydroarylation: Is It Carbonickelation or Hydronickelation?

Wen-Yan Tong<sup>†,‡</sup>, Zhizheng Chen<sup>†</sup>, Shuanglin Qu,<sup>\*,†</sup> Xiaotai Wang,<sup>\*,‡</sup>

<sup>†</sup> College of Chemistry and Chemical Engineering, Hunan University, Changsha 410082, P. R. China

<sup>‡</sup> Department of Chemistry, Xi'an Jiaotong-Liverpool University, Suzhou 215123, China

\*Corresponding authors: Xiaotai.Wang@xjtlu.edu.cn, squ@hnu.edu.cn

#### Table of Contents

|                                                                              |        |
|------------------------------------------------------------------------------|--------|
| ■ Fig. S1–S5 Additional computed transition states of higher energy          | S2–S3  |
| ■ Table S1 Relative energies of doublets and quartets of selected structures | S3     |
| ■ Cartesian coordinates (Å) of optimized structures                          | S4–S73 |

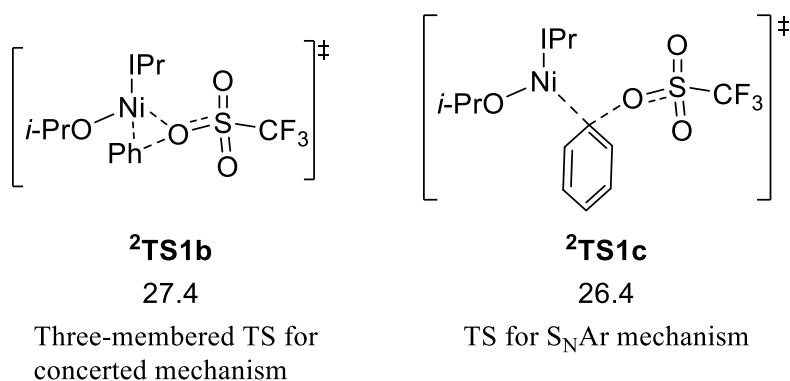

**Figure S1.** Higher-energy transition states of oxidative addition of **2a** to <sup>2</sup>CAT1 that are isomers of <sup>2</sup>TS1a in Figure 2.

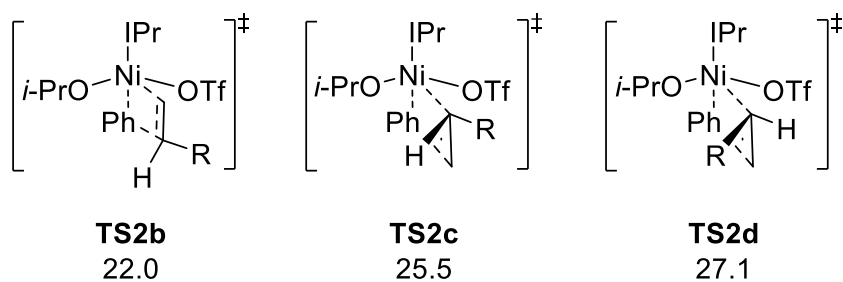

**Figure S2.** Higher-energy transition states of 3-butenylbenzene (**1a**) migratory insertion into <sup>2</sup>IM1 that are isomers of <sup>2</sup>TS2a in Figure 2.

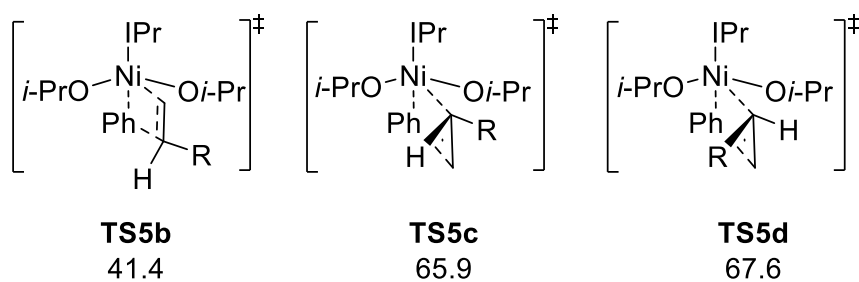

**Figure S3.** Higher-energy transition states of 3-butenylbenzene (**1a**) migratory insertion into <sup>2</sup>IM5 that are isomers of <sup>2</sup>TS5a in Figure 3.

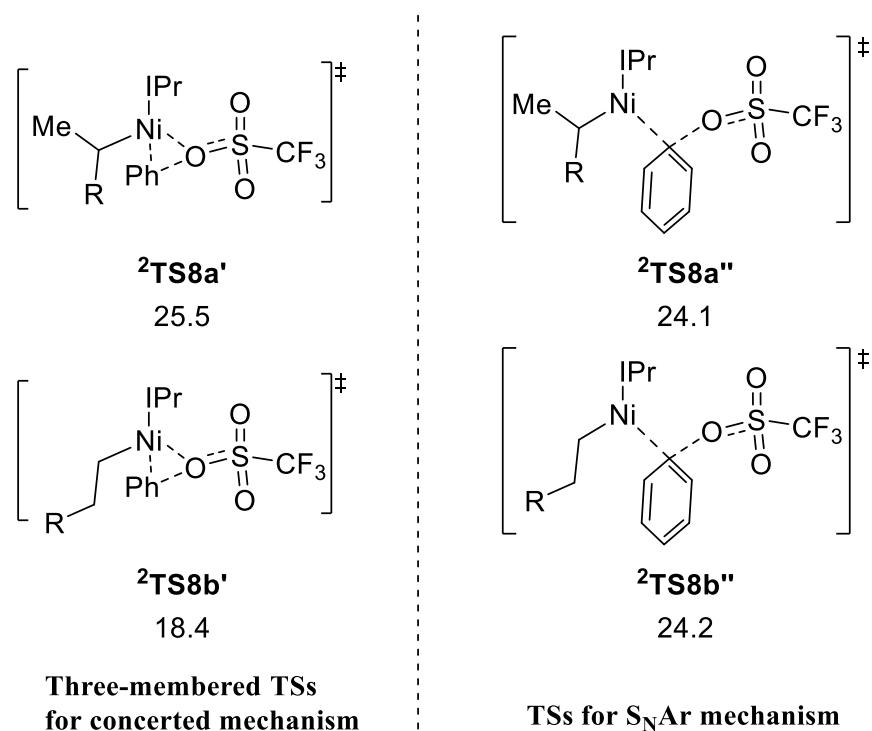

**Figure S4.** Higher-energy transition states of oxidative addition of **2a** to **<sup>2</sup>IM8a** that are isomers of **<sup>2</sup>TS8a** and **<sup>2</sup>TS8b** in Figure 4.

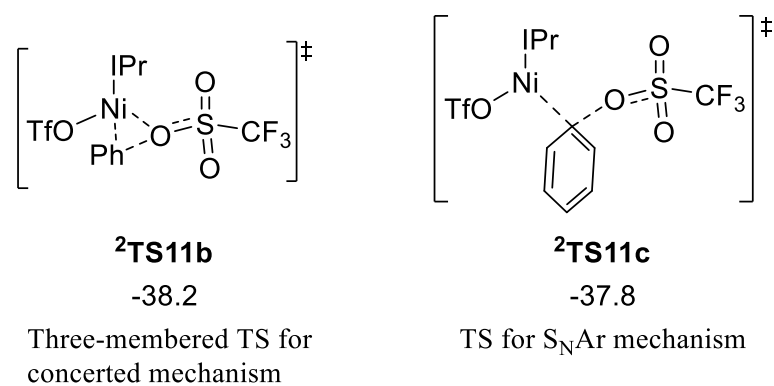

**Figure S5.** Higher-energy transition states of oxidative addition of **2a** to **<sup>2</sup>IM11** that are isomers of **<sup>2</sup>TS11a** in Figure 6.

**Table S1.** Relative energies of the doublet and quartet states of key structures selected from the most favored reaction pathway (see Figure 6).

|                                                     | <b>CAT1</b> | <b>TS6</b> | <b>TS7a</b> |
|-----------------------------------------------------|-------------|------------|-------------|
| Doublet state                                       | 0.0         | 15.9       | 12.8        |
| Quartet state                                       | 38.0        | 55.7       | 90.7        |
| $\Delta\Delta G_{\text{sol}}^{\ddagger}$ (kcal/mol) | 38.3        | 39.8       | 77.9        |

## Cartesian Coordinates (Å) of Optimized Structures

### 1a

|   |           |           |           |
|---|-----------|-----------|-----------|
| C | -4.014359 | 2.856831  | 0.913589  |
| C | -2.622299 | 2.871019  | 0.997977  |
| C | -1.837899 | 2.182772  | 0.064402  |
| C | -2.483980 | 1.477517  | -0.958062 |
| C | -3.875730 | 1.459801  | -1.047610 |
| C | -4.646098 | 2.149971  | -0.110663 |
| H | -4.605684 | 3.401126  | 1.645007  |
| H | -2.134612 | 3.426342  | 1.796243  |
| H | -1.887469 | 0.940467  | -1.692211 |
| H | -4.358533 | 0.910286  | -1.851241 |
| H | -5.730198 | 2.140161  | -0.180260 |
| C | -0.333490 | 2.153468  | 0.190368  |
| H | 0.128325  | 2.057950  | -0.799358 |
| H | 0.025490  | 3.099002  | 0.616687  |
| C | 0.153329  | 0.984183  | 1.078317  |
| H | -0.192508 | 0.036077  | 0.648849  |
| H | -0.327338 | 1.077681  | 2.062721  |
| C | 1.646872  | 0.967680  | 1.233938  |
| H | 2.084423  | 1.846833  | 1.710694  |
| C | 2.449238  | -0.011629 | 0.816931  |
| H | 2.054216  | -0.903101 | 0.333573  |
| H | 3.527258  | 0.034437  | 0.945325  |

### 2a

|   |           |           |           |
|---|-----------|-----------|-----------|
| C | -1.846008 | -0.610434 | -0.163349 |
| C | -0.712572 | -0.804254 | -0.944358 |
| C | -2.208146 | 0.638108  | 0.329694  |
| C | 0.081389  | 0.302955  | -1.243751 |
| H | -0.470241 | -1.794997 | -1.309622 |
| C | -1.399966 | 1.733745  | 0.027837  |
| H | -3.103017 | 0.735383  | 0.934377  |
| C | -0.258494 | 1.567546  | -0.758986 |
| H | 0.969011  | 0.173369  | -1.855223 |
| H | -1.664984 | 2.715933  | 0.406977  |
| H | 0.366771  | 2.423533  | -0.993746 |
| O | -2.639016 | -1.715617 | 0.218673  |
| S | -3.625900 | -2.424046 | -0.882118 |
| O | -3.027718 | -2.409278 | -2.206353 |
| O | -4.114138 | -3.626872 | -0.239426 |

|   |           |           |           |
|---|-----------|-----------|-----------|
| C | -5.031498 | -1.186766 | -0.900171 |
| F | -4.648206 | -0.080303 | -1.535647 |
| F | -6.065228 | -1.734263 | -1.532646 |
| F | -5.376660 | -0.882372 | 0.350966  |

### <sup>2</sup>TM10a

|    |           |           |           |
|----|-----------|-----------|-----------|
| C  | 0.863868  | 0.626692  | 4.494263  |
| C  | 1.026238  | -0.514348 | 5.204646  |
| H  | 0.696485  | 1.646878  | 4.799922  |
| H  | 1.044365  | -0.704855 | 6.265389  |
| C  | 1.162045  | -1.077068 | 2.996295  |
| N  | 1.199592  | -1.537856 | 4.278831  |
| N  | 0.946775  | 0.264168  | 3.154014  |
| C  | 0.829596  | 1.214626  | 2.081291  |
| C  | 1.921048  | 2.064819  | 1.826872  |
| C  | -0.378066 | 1.271441  | 1.360194  |
| C  | 1.783225  | 2.983683  | 0.780840  |
| C  | -0.459202 | 2.206199  | 0.321851  |
| C  | 0.611479  | 3.049313  | 0.032868  |
| H  | 2.603733  | 3.650083  | 0.542605  |
| H  | -1.366821 | 2.278918  | -0.265988 |
| H  | 0.529327  | 3.765246  | -0.780108 |
| C  | 1.427668  | -2.893899 | 4.711898  |
| C  | 0.335304  | -3.772553 | 4.779097  |
| C  | 2.727734  | -3.246584 | 5.095727  |
| C  | 0.580354  | -5.055063 | 5.275879  |
| C  | 2.924147  | -4.545606 | 5.577316  |
| C  | 1.861161  | -5.438604 | 5.670903  |
| H  | -0.233959 | -5.767904 | 5.342530  |
| H  | 3.919374  | -4.862138 | 5.872685  |
| H  | 2.030792  | -6.443621 | 6.047520  |
| Ni | 1.222958  | -2.171028 | 1.157577  |
| C  | -1.566115 | 0.389457  | 1.730428  |
| H  | -1.177341 | -0.603135 | 1.980100  |
| C  | -2.579666 | 0.211475  | 0.593131  |
| H  | -3.323203 | -0.538751 | 0.882180  |
| H  | -3.120265 | 1.141529  | 0.383011  |
| H  | -2.102314 | -0.123710 | -0.332317 |
| C  | -2.284690 | 0.931109  | 2.982311  |
| H  | -3.123117 | 0.277369  | 3.248781  |

|   |           |           |           |                          |           |           |           |
|---|-----------|-----------|-----------|--------------------------|-----------|-----------|-----------|
| H | -1.616588 | 0.985324  | 3.845191  | C                        | -1.949829 | -4.191772 | -0.508532 |
| H | -2.681127 | 1.935400  | 2.791577  | H                        | -1.365199 | -5.067215 | -0.814117 |
| C | 3.203642  | 1.981458  | 2.649784  | H                        | -2.286737 | -3.695685 | -1.426057 |
| H | 2.914490  | 1.788977  | 3.689127  | C                        | -1.033275 | -3.227990 | 0.291077  |
| C | 4.095471  | 0.807191  | 2.205203  | H                        | -0.812855 | -3.703022 | 1.251232  |
| H | 4.974900  | 0.744390  | 2.857118  | H                        | -1.608842 | -2.321708 | 0.513194  |
| H | 3.566777  | -0.145118 | 2.249479  | C                        | 0.264990  | -2.868918 | -0.438327 |
| H | 4.435741  | 0.942629  | 1.174912  | H                        | 0.821072  | -3.770338 | -0.705372 |
| C | 4.006914  | 3.289355  | 2.647979  | C                        | 0.037637  | -1.998847 | -1.662619 |
| H | 4.828373  | 3.215709  | 3.368452  | H                        | -0.692069 | -2.466128 | -2.341148 |
| H | 4.455045  | 3.487245  | 1.667697  | H                        | 0.959050  | -1.838027 | -2.224564 |
| H | 3.388209  | 4.151362  | 2.921772  | C                        | 2.470643  | -1.339574 | -0.022022 |
| C | -1.055912 | -3.340018 | 4.336794  | C                        | 3.709324  | -1.988673 | -0.129962 |
| H | -0.927002 | -2.642720 | 3.502473  | C                        | 2.303797  | -0.106807 | -0.661056 |
| C | -1.918121 | -4.500035 | 3.826210  | C                        | 4.764565  | -1.399739 | -0.833406 |
| H | -2.223121 | -5.168014 | 4.640610  | H                        | 3.855874  | -2.953334 | 0.344626  |
| H | -2.831213 | -4.115543 | 3.362499  | C                        | 3.356864  | 0.482042  | -1.365956 |
| H | -1.386764 | -5.094580 | 3.080099  | H                        | 1.352820  | 0.411334  | -0.617130 |
| C | -1.793418 | -2.590310 | 5.463052  | C                        | 4.593467  | -0.160260 | -1.453516 |
| H | -1.248671 | -1.698713 | 5.786847  | H                        | 5.719627  | -1.916002 | -0.900154 |
| H | -2.785950 | -2.273161 | 5.121504  | H                        | 3.206000  | 1.448489  | -1.841665 |
| H | -1.926851 | -3.242567 | 6.334332  | H                        | 5.412464  | 0.296115  | -2.003403 |
| C | 3.897019  | -2.286529 | 4.933098  | O                        | 1.732461  | -3.795370 | 1.947071  |
| H | 3.495032  | -1.276671 | 4.807907  | C                        | 2.074229  | -4.999766 | 1.326207  |
| C | 4.817234  | -2.255284 | 6.162226  | H                        | 2.214829  | -4.856632 | 0.237620  |
| H | 4.258317  | -2.025915 | 7.076685  | C                        | 0.971616  | -6.052222 | 1.521235  |
| H | 5.328415  | -3.212654 | 6.312493  | H                        | 1.239875  | -7.008066 | 1.052842  |
| H | 5.590957  | -1.490153 | 6.032000  | H                        | 0.812111  | -6.220414 | 2.592109  |
| C | 4.678485  | -2.622029 | 3.651242  | H                        | 0.026640  | -5.713811 | 1.086673  |
| H | 5.152095  | -3.606797 | 3.735682  | C                        | 3.405033  | -5.520895 | 1.887809  |
| H | 4.006520  | -2.648768 | 2.791073  | H                        | 3.320476  | -5.660689 | 2.970803  |
| H | 5.461977  | -1.876510 | 3.472329  | H                        | 3.684360  | -6.477553 | 1.427714  |
| H | -0.359556 | -1.011762 | -1.395585 | H                        | 4.210094  | -4.803100 | 1.702516  |
| C | -5.231518 | -4.090181 | 1.431718  |                          |           |           |           |
| C | -4.169212 | -3.723225 | 0.606192  |                          |           |           |           |
| C | -3.135759 | -4.625361 | 0.316695  |                          |           |           |           |
| C | -3.201206 | -5.910101 | 0.867815  | <b><sup>2</sup>TM10b</b> |           |           |           |
| C | -4.263674 | -6.284294 | 1.691931  | C                        | 5.890662  | -1.419865 | 6.268957  |
| C | -5.280928 | -5.374054 | 1.980649  | C                        | 4.605491  | -1.220872 | 6.649121  |
| H | -6.023503 | -3.376586 | 1.643456  | H                        | 6.799176  | -1.528154 | 6.838980  |
| H | -4.139500 | -2.725148 | 0.174791  | H                        | 4.152775  | -1.125125 | 7.622678  |
| H | -2.404761 | -6.619181 | 0.656329  | C                        | 4.621224  | -1.361964 | 4.374046  |
| H | -4.294036 | -7.286347 | 2.111070  | N                        | 3.850224  | -1.177918 | 5.478863  |
| H | -6.107342 | -5.662127 | 2.624231  | N                        | 5.879369  | -1.504734 | 4.880056  |
|   |           |           |           | C                        | 7.037168  | -1.817809 | 4.085432  |

|   |           |           |          |    |          |           |           |
|---|-----------|-----------|----------|----|----------|-----------|-----------|
| C | 7.540377  | -3.125475 | 4.144225 | H  | 5.705537 | -5.054437 | 3.483557  |
| C | 7.601434  | -0.812599 | 3.277027 | H  | 7.260583 | -5.897191 | 3.683593  |
| C | 8.652236  | -3.424156 | 3.348725 | H  | 5.970903 | -6.140959 | 4.873360  |
| C | 8.700489  | -1.167569 | 2.489646 | C  | 7.067401 | 0.615376  | 3.303358  |
| C | 9.219885  | -2.461292 | 2.522573 | H  | 5.974025 | 0.561071  | 3.327032  |
| H | 9.062615  | -4.429149 | 3.365496 | C  | 7.515607 | 1.340086  | 4.587487  |
| H | 9.160215  | -0.427608 | 1.844813 | H  | 7.175566 | 0.818389  | 5.486464  |
| H | 10.073155 | -2.715459 | 1.900078 | H  | 8.609043 | 1.409488  | 4.626046  |
| C | 2.424863  | -0.980713 | 5.450598 | H  | 7.107198 | 2.357062  | 4.613355  |
| C | 1.926905  | 0.288155  | 5.798688 | C  | 7.451404 | 1.440899  | 2.069734  |
| C | 1.604667  | -2.059890 | 5.069432 | H  | 8.524849 | 1.661782  | 2.047540  |
| C | 0.541583  | 0.469324  | 5.742830 | H  | 7.187430 | 0.926603  | 1.140739  |
| C | 0.228405  | -1.815419 | 5.021170 | H  | 6.922549 | 2.399993  | 2.089680  |
| C | -0.296069 | -0.568910 | 5.349038 | Ni | 4.223509 | -1.432402 | 2.314720  |
| H | 0.113320  | 1.432106  | 5.997081 | H  | 2.832339 | 0.306042  | -0.291489 |
| H | -0.443400 | -2.605907 | 4.711302 | H  | 4.891422 | 0.418516  | 1.107561  |
| H | -1.368547 | -0.405477 | 5.293443 | C  | 3.445232 | -5.376702 | -3.600973 |
| C | 2.184704  | -3.434631 | 4.742102 | C  | 3.860057 | -4.371186 | -2.728736 |
| H | 3.014397  | -3.297506 | 4.040751 | C  | 4.180398 | -3.091722 | -3.203143 |
| C | 1.183102  | -4.375223 | 4.061310 | C  | 4.069890 | -2.847417 | -4.577095 |
| H | 0.377855  | -4.677924 | 4.742396 | C  | 3.655106 | -3.850010 | -5.455321 |
| H | 0.734573  | -3.914091 | 3.178121 | C  | 3.341316 | -5.119974 | -4.969747 |
| H | 1.703645  | -5.284108 | 3.742397 | H  | 3.205473 | -6.362788 | -3.211582 |
| C | 2.744739  | -4.123056 | 6.003532 | H  | 3.936614 | -4.577329 | -1.665854 |
| H | 3.525687  | -3.534017 | 6.490544 | H  | 4.314761 | -1.859706 | -4.961494 |
| H | 1.946659  | -4.299357 | 6.735252 | H  | 3.579679 | -3.639191 | -6.518920 |
| H | 3.179600  | -5.092339 | 5.734198 | H  | 3.020560 | -5.903121 | -5.651207 |
| C | 2.858966  | 1.435603  | 6.183430 | C  | 4.588028 | -1.994759 | -2.247865 |
| H | 3.684522  | 1.020473  | 6.769873 | H  | 5.301881 | -2.388885 | -1.516534 |
| C | 3.488161  | 2.091250  | 4.940127 | H  | 5.109490 | -1.201970 | -2.800556 |
| H | 4.209012  | 2.861469  | 5.238828 | C  | 3.382648 | -1.377300 | -1.514667 |
| H | 4.010036  | 1.356007  | 4.322185 | H  | 2.870551 | -2.148427 | -0.929306 |
| H | 2.716294  | 2.566448  | 4.324782 | H  | 2.661170 | -1.034340 | -2.267716 |
| C | 2.187401  | 2.500225  | 7.061496 | C  | 3.750585 | -0.197148 | -0.608782 |
| H | 1.435410  | 3.071525  | 6.505696 | H  | 4.302841 | 0.537148  | -1.220921 |
| H | 1.698237  | 2.054540  | 7.934271 | C  | 4.597720 | -0.522110 | 0.614506  |
| H | 2.938306  | 3.214063  | 7.417081 | H  | 5.507006 | -1.083837 | 0.362743  |
| C | 6.929940  | -4.199603 | 5.032628 | C  | 2.422454 | -0.950682 | 1.972265  |
| H | 6.047019  | -3.782074 | 5.521561 | C  | 1.872388 | 0.306136  | 2.238036  |
| C | 7.916482  | -4.622195 | 6.134801 | C  | 1.584967 | -1.971025 | 1.503838  |
| H | 8.819354  | -5.073691 | 5.707764 | C  | 0.501508 | 0.528780  | 2.084879  |
| H | 8.231896  | -3.766043 | 6.743111 | H  | 2.507199 | 1.120806  | 2.569059  |
| H | 7.454033  | -5.361558 | 6.798638 | C  | 0.215328 | -1.745147 | 1.341031  |
| C | 6.438866  | -5.400640 | 4.213150 | H  | 1.998634 | -2.946329 | 1.270378  |

|   |           |           |           |
|---|-----------|-----------|-----------|
| C | -0.332581 | -0.495714 | 1.635093  |
| H | 0.087213  | 1.506623  | 2.318698  |
| H | -0.421467 | -2.549110 | 0.978699  |
| H | -1.397581 | -0.320413 | 1.509575  |
| O | 4.776061  | -3.217331 | 2.232423  |
| C | 4.754936  | -3.927627 | 1.024370  |
| H | 4.227960  | -3.340359 | 0.255275  |
| C | 3.981736  | -5.243514 | 1.196008  |
| H | 2.968849  | -5.041357 | 1.560462  |
| H | 3.905174  | -5.795926 | 0.250565  |
| H | 4.478506  | -5.892244 | 1.925603  |
| C | 6.184332  | -4.172266 | 0.522821  |
| H | 6.720155  | -3.220507 | 0.439028  |
| H | 6.735592  | -4.796552 | 1.233953  |
| H | 6.191679  | -4.668342 | -0.456228 |

**<sup>2</sup>M11**

|    |           |           |           |
|----|-----------|-----------|-----------|
| C  | 0.922588  | 1.784370  | 2.379314  |
| C  | 2.188247  | 1.440061  | 2.025182  |
| H  | 0.544456  | 2.382300  | 3.192553  |
| H  | 3.144163  | 1.660711  | 2.472125  |
| C  | 0.776754  | 0.516619  | 0.494483  |
| N  | 2.075821  | 0.665508  | 0.875623  |
| N  | 0.076824  | 1.209282  | 1.437524  |
| C  | -1.356385 | 1.351567  | 1.408617  |
| C  | -1.896143 | 2.459022  | 0.736569  |
| C  | -2.146745 | 0.358967  | 2.016408  |
| C  | -3.289409 | 2.585876  | 0.717746  |
| C  | -3.533260 | 0.531627  | 1.966636  |
| C  | -4.098510 | 1.635923  | 1.332333  |
| H  | -3.742962 | 3.425563  | 0.200598  |
| H  | -4.179742 | -0.214261 | 2.414362  |
| H  | -5.178972 | 1.745131  | 1.302249  |
| C  | 3.162511  | 0.024160  | 0.187612  |
| C  | 3.575078  | -1.241820 | 0.635370  |
| C  | 3.721754  | 0.665166  | -0.929377 |
| C  | 4.607687  | -1.865809 | -0.072595 |
| C  | 4.750266  | -0.000791 | -1.604347 |
| C  | 5.190950  | -1.251544 | -1.178420 |
| H  | 4.948534  | -2.848767 | 0.236397  |
| H  | 5.202530  | 0.458728  | -2.477536 |
| H  | 5.988006  | -1.755361 | -1.717777 |
| Ni | 0.056283  | -0.412650 | -0.976772 |

|   |           |           |           |
|---|-----------|-----------|-----------|
| O | -0.839488 | -1.240428 | -2.583602 |
| S | -1.739051 | -2.142430 | -1.756781 |
| O | -2.064007 | -3.445422 | -2.319950 |
| O | -1.233182 | -2.079471 | -0.343966 |
| C | -3.342723 | -1.199012 | -1.673321 |
| F | -3.971634 | -1.247406 | -2.849323 |
| F | -4.127858 | -1.737321 | -0.731378 |
| F | -3.113330 | 0.083239  | -1.358149 |
| C | -1.519679 | -0.846746 | 2.702363  |
| H | -0.603087 | -1.091970 | 2.157288  |
| C | -2.412639 | -2.094107 | 2.658421  |
| H | -1.843817 | -2.962695 | 3.006989  |
| H | -3.286158 | -1.992395 | 3.313633  |
| H | -2.750788 | -2.297181 | 1.640607  |
| C | -1.136633 | -0.510667 | 4.156507  |
| H | -0.671554 | -1.378851 | 4.637770  |
| H | -0.429386 | 0.322743  | 4.211166  |
| H | -2.026532 | -0.237791 | 4.736012  |
| C | -1.019432 | 3.445530  | -0.019471 |
| H | 0.021387  | 3.270735  | 0.269823  |
| C | -1.124074 | 3.184089  | -1.533305 |
| H | -0.450313 | 3.848256  | -2.087424 |
| H | -0.861128 | 2.147124  | -1.767449 |
| H | -2.145529 | 3.357513  | -1.890429 |
| C | -1.347008 | 4.907287  | 0.321379  |
| H | -0.649713 | 5.580012  | -0.190528 |
| H | -2.359230 | 5.180871  | 0.004103  |
| H | -1.272246 | 5.090788  | 1.398880  |
| C | 2.887796  | -1.946122 | 1.795931  |
| H | 2.267175  | -1.213453 | 2.320739  |
| C | 1.949110  | -3.049213 | 1.271827  |
| H | 2.514570  | -3.816877 | 0.730656  |
| H | 1.430619  | -3.535306 | 2.106585  |
| H | 1.192881  | -2.643792 | 0.593345  |
| C | 3.892156  | -2.504025 | 2.816537  |
| H | 4.565161  | -1.721549 | 3.184578  |
| H | 3.358600  | -2.929026 | 3.673820  |
| H | 4.507671  | -3.301798 | 2.386351  |
| C | 3.188228  | 1.995749  | -1.437329 |
| H | 2.538471  | 2.417974  | -0.664395 |
| C | 4.305948  | 3.015749  | -1.703925 |
| H | 4.923139  | 3.170463  | -0.812330 |
| H | 4.965023  | 2.692760  | -2.517198 |
| H | 3.874772  | 3.980177  | -1.994589 |

|   |          |          |           |
|---|----------|----------|-----------|
| C | 2.326202 | 1.775365 | -2.693714 |
| H | 2.923203 | 1.354821 | -3.510647 |
| H | 1.505081 | 1.076262 | -2.493204 |
| H | 1.889079 | 2.720031 | -3.035797 |

**<sup>2</sup>IM12**

|    |           |           |           |
|----|-----------|-----------|-----------|
| C  | 0.605302  | -3.202425 | 0.400714  |
| C  | -0.720064 | -3.097687 | 0.673663  |
| H  | 1.268932  | -4.050887 | 0.396204  |
| H  | -1.448723 | -3.832274 | 0.972294  |
| C  | 0.044764  | -1.023604 | 0.161984  |
| N  | -1.045866 | -1.756339 | 0.520362  |
| N  | 1.059656  | -1.923351 | 0.101093  |
| C  | 2.459587  | -1.604624 | -0.097087 |
| C  | 3.028578  | -1.812971 | -1.362482 |
| C  | 3.194672  | -1.141613 | 1.013899  |
| C  | 4.391049  | -1.523719 | -1.507536 |
| C  | 4.547195  | -0.859806 | 0.808456  |
| C  | 5.139774  | -1.046934 | -0.438400 |
| H  | 4.863290  | -1.669089 | -2.473323 |
| H  | 5.142037  | -0.479576 | 1.630352  |
| H  | 6.192356  | -0.815053 | -0.574777 |
| C  | -2.296211 | -1.147873 | 0.904730  |
| C  | -2.341083 | -0.506331 | 2.156959  |
| C  | -3.397891 | -1.202790 | 0.030795  |
| C  | -3.520324 | 0.169743  | 2.493477  |
| C  | -4.552656 | -0.517300 | 0.420400  |
| C  | -4.609386 | 0.176708  | 1.627501  |
| H  | -3.586738 | 0.680409  | 3.449530  |
| H  | -5.417488 | -0.523436 | -0.233733 |
| H  | -5.517178 | 0.706494  | 1.903478  |
| Ni | -0.008054 | 0.943753  | -0.369429 |
| C  | -0.861825 | 2.895339  | -0.409754 |
| C  | -1.880060 | 2.742548  | 0.518166  |
| C  | -0.949693 | 3.624488  | -1.581005 |
| C  | -3.153612 | 3.172969  | 0.121259  |
| H  | -1.731074 | 2.265590  | 1.480071  |
| C  | -2.225913 | 4.058546  | -1.945189 |
| H  | -0.081882 | 3.795979  | -2.203651 |
| C  | -3.318970 | 3.822879  | -1.102300 |
| H  | -3.998236 | 3.007540  | 0.782641  |
| H  | -2.363092 | 4.583350  | -2.886238 |
| H  | -4.304525 | 4.173875  | -1.393685 |

|   |           |           |           |
|---|-----------|-----------|-----------|
| O | 1.293018  | 4.005149  | 0.554193  |
| S | 2.241105  | 2.884753  | 0.652370  |
| O | 3.314936  | 2.950368  | 1.642303  |
| O | 1.538242  | 1.517581  | 0.696934  |
| C | 3.096944  | 2.829990  | -1.000338 |
| F | 3.951791  | 3.851954  | -1.090467 |
| F | 3.761764  | 1.683390  | -1.147656 |
| F | 2.197666  | 2.935762  | -1.994149 |
| C | 2.567548  | -1.004904 | 2.395138  |
| H | 1.540394  | -0.664963 | 2.250823  |
| C | 3.256216  | 0.031037  | 3.291701  |
| H | 2.668900  | 0.161719  | 4.207975  |
| H | 4.255099  | -0.301219 | 3.599048  |
| H | 3.343647  | 1.000893  | 2.799576  |
| C | 2.531359  | -2.367704 | 3.116020  |
| H | 2.050858  | -2.264329 | 4.096457  |
| H | 1.979936  | -3.124668 | 2.552216  |
| H | 3.549701  | -2.740320 | 3.277009  |
| C | 2.235943  | -2.385890 | -2.524649 |
| H | 1.173975  | -2.254257 | -2.315579 |
| C | 2.521028  | -1.666160 | -3.851562 |
| H | 1.805227  | -2.000973 | -4.609040 |
| H | 2.414204  | -0.585379 | -3.736530 |
| H | 3.529107  | -1.881875 | -4.224754 |
| C | 2.506670  | -3.896088 | -2.663116 |
| H | 1.911393  | -4.315466 | -3.482095 |
| H | 3.565090  | -4.085153 | -2.878251 |
| H | 2.252839  | -4.441379 | -1.747115 |
| C | -1.205953 | -0.597861 | 3.170104  |
| H | -0.416415 | -1.220887 | 2.745298  |
| C | -0.584023 | 0.768638  | 3.500878  |
| H | -1.339035 | 1.475016  | 3.865563  |
| H | 0.172980  | 0.659082  | 4.284805  |
| H | -0.083036 | 1.208845  | 2.634250  |
| C | -1.688683 | -1.307341 | 4.448700  |
| H | -2.123033 | -2.285926 | 4.217471  |
| H | -0.847887 | -1.457691 | 5.135027  |
| H | -2.448682 | -0.718499 | 4.974158  |
| C | -3.374285 | -2.033574 | -1.241614 |
| H | -2.335749 | -2.130783 | -1.563775 |
| C | -3.925473 | -3.444648 | -0.951545 |
| H | -3.366014 | -3.953064 | -0.159514 |
| H | -4.973602 | -3.393327 | -0.633787 |
| H | -3.872679 | -4.064545 | -1.853449 |



|   |           |           |           |
|---|-----------|-----------|-----------|
| C | -4.154315 | -1.401057 | -2.403621 |
| H | -5.236975 | -1.430642 | -2.231323 |
| H | -3.850132 | -0.365593 | -2.563842 |
| H | -3.953164 | -1.962531 | -3.321763 |
| O | -1.708084 | 0.490850  | -1.867937 |
| S | -0.690196 | 0.062019  | -2.880271 |
| C | -1.048386 | 1.046873  | -4.418291 |
| F | -0.814881 | 2.348555  | -4.226739 |
| F | -0.269919 | 0.610116  | -5.409486 |
| F | -2.331946 | 0.878578  | -4.750879 |
| O | -0.751664 | -1.332326 | -3.323611 |
| O | 0.650352  | 0.570134  | -2.400787 |

**<sup>2</sup>IM13**

|   |           |           |           |
|---|-----------|-----------|-----------|
| C | 0.827561  | 0.323166  | 0.650671  |
| C | 2.591690  | 1.392973  | -0.280633 |
| C | 2.774889  | 1.387159  | 1.060448  |
| N | 1.679525  | 0.738353  | 1.621963  |
| N | 1.382342  | 0.748271  | -0.518745 |
| H | 3.562483  | 1.779489  | 1.681312  |
| H | 3.186283  | 1.786716  | -1.087332 |
| C | 1.487132  | 0.782898  | 3.062356  |
| C | 0.884375  | 1.940824  | 3.588798  |
| C | 2.034502  | -0.235487 | 3.858033  |
| C | 0.876319  | 2.081002  | 4.979296  |
| C | 2.014505  | -0.029920 | 5.240710  |
| C | 1.453442  | 1.114969  | 5.795083  |
| H | 0.410150  | 2.953463  | 5.424152  |
| H | 2.410886  | -0.795946 | 5.895015  |
| H | 1.437212  | 1.238911  | 6.873727  |
| C | 0.750474  | 0.763486  | -1.818888 |
| C | 0.064435  | 1.938050  | -2.193420 |
| C | 0.912392  | -0.338751 | -2.674414 |
| C | -0.503298 | 1.970522  | -3.471053 |
| C | 0.336012  | -0.243232 | -3.946967 |
| C | -0.368682 | 0.890393  | -4.339469 |
| H | -1.043761 | 2.854349  | -3.793010 |
| H | 0.436337  | -1.072496 | -4.636874 |
| H | -0.811015 | 0.935810  | -5.330590 |
| C | -3.202975 | -3.332545 | -1.005176 |
| C | -2.773933 | -3.044807 | -2.298436 |
| C | -2.464919 | -1.729121 | -2.652427 |
| C | -2.584272 | -0.705150 | -1.716199 |

|    |           |           |           |
|----|-----------|-----------|-----------|
| C  | -3.041527 | -0.981893 | -0.412736 |
| C  | -3.340537 | -2.308160 | -0.068693 |
| H  | -3.400370 | -4.355209 | -0.704839 |
| H  | -2.659430 | -3.844183 | -3.024488 |
| H  | -2.122299 | -1.498325 | -3.654991 |
| H  | -2.335889 | 0.311440  | -2.005041 |
| H  | -3.646483 | -2.544719 | 0.941911  |
| C  | -1.847824 | 0.799939  | 0.841787  |
| H  | -1.689421 | 1.238825  | 1.819225  |
| H  | -1.514220 | 1.417867  | 0.013790  |
| C  | -3.190278 | 0.137572  | 0.619200  |
| H  | -3.515284 | -0.301465 | 1.563695  |
| C  | -4.245774 | 1.188062  | 0.199184  |
| H  | -3.972645 | 1.623165  | -0.770491 |
| H  | -5.198648 | 0.665337  | 0.047258  |
| C  | -4.424106 | 2.307867  | 1.238946  |
| H  | -3.476356 | 2.843338  | 1.366461  |
| H  | -4.655499 | 1.857999  | 2.211843  |
| Ni | -0.710353 | -0.847627 | 0.842541  |
| O  | 0.016383  | -2.627170 | 0.271467  |
| C  | 1.732447  | -1.555428 | -2.272585 |
| C  | 3.224781  | -1.310582 | -2.571621 |
| C  | 1.256739  | -2.844704 | -2.951598 |
| H  | 1.619149  | -1.705580 | -1.196075 |
| H  | 3.615316  | -0.443010 | -2.030397 |
| H  | 3.814407  | -2.184036 | -2.273063 |
| H  | 3.383460  | -1.141190 | -3.643348 |
| H  | 0.191904  | -3.012101 | -2.775534 |
| H  | 1.442982  | -2.831242 | -4.032063 |
| H  | 1.799152  | -3.695092 | -2.535665 |
| C  | -0.010156 | 3.168362  | -1.297405 |
| C  | -1.397491 | 3.832509  | -1.288528 |
| C  | 1.057923  | 4.200826  | -1.707060 |
| H  | 0.211917  | 2.860146  | -0.272988 |
| H  | -2.197793 | 3.115949  | -1.085312 |
| H  | -1.430656 | 4.605964  | -0.513360 |
| H  | -1.620401 | 4.318444  | -2.244336 |
| H  | 2.065905  | 3.778475  | -1.667094 |
| H  | 0.881442  | 4.553214  | -2.729500 |
| H  | 1.027038  | 5.066419  | -1.035987 |
| C  | 2.607702  | -1.512286 | 3.260398  |
| C  | 2.473785  | -2.708490 | 4.212058  |
| C  | 4.079337  | -1.330962 | 2.841390  |
| H  | 2.024706  | -1.756329 | 2.366990  |

|   |           |           |           |
|---|-----------|-----------|-----------|
| H | 1.447150  | -2.804557 | 4.573300  |
| H | 2.726319  | -3.625798 | 3.677571  |
| H | 3.148915  | -2.616350 | 5.071899  |
| H | 4.205181  | -0.554820 | 2.079494  |
| H | 4.696850  | -1.059447 | 3.706225  |
| H | 4.467155  | -2.268738 | 2.428414  |
| C | 0.288520  | 3.031242  | 2.709264  |
| C | 1.270113  | 4.202512  | 2.522126  |
| C | -1.062988 | 3.540184  | 3.238925  |
| H | 0.103360  | 2.600466  | 1.722072  |
| H | 2.210932  | 3.875635  | 2.068498  |
| H | 0.831095  | 4.970931  | 1.874013  |
| H | 1.503580  | 4.666436  | 3.486958  |
| H | -1.731351 | 2.712237  | 3.488704  |
| H | -0.934979 | 4.151640  | 4.138871  |
| H | -1.543409 | 4.174440  | 2.484117  |
| S | -1.665733 | -0.868330 | 3.997213  |
| O | -0.842233 | -1.053662 | 5.187930  |
| O | -2.359129 | 0.418817  | 3.807244  |
| O | -0.972585 | -1.364689 | 2.731203  |
| C | -3.029367 | -2.119651 | 4.175159  |
| F | -3.898481 | -2.023683 | 3.144566  |
| F | -2.541968 | -3.352814 | 4.212377  |
| F | -3.702763 | -1.871271 | 5.303826  |
| C | -5.502452 | 3.280198  | 0.827597  |
| C | -5.187288 | 4.422017  | 0.080510  |
| C | -6.845795 | 3.034910  | 1.138214  |
| C | -6.186144 | 5.297011  | -0.347102 |
| H | -4.146977 | 4.628593  | -0.161347 |
| C | -7.848571 | 3.906288  | 0.713185  |
| H | -7.104298 | 2.154732  | 1.722437  |
| C | -7.521626 | 5.040729  | -0.032181 |
| H | -5.921819 | 6.180846  | -0.921570 |
| H | -8.884903 | 3.702298  | 0.968122  |
| H | -8.301282 | 5.722020  | -0.360855 |
| S | -0.142642 | -3.920251 | 1.089850  |
| O | 0.919670  | -4.092891 | 2.080615  |
| O | -1.528318 | -4.203607 | 1.471656  |
| C | 0.254092  | -5.170085 | -0.227662 |
| F | 1.532919  | -5.048760 | -0.621016 |
| F | 0.076592  | -6.399248 | 0.265001  |
| F | -0.538293 | -5.023407 | -1.301498 |

**<sup>2</sup>TM14**

|    |           |           |           |
|----|-----------|-----------|-----------|
| Ni | -0.960856 | -0.401250 | 0.756374  |
| N  | 1.311030  | 1.237472  | 1.730797  |
| N  | -0.333223 | 1.091182  | 3.139473  |
| C  | 2.973605  | 0.403681  | 0.115393  |
| C  | 3.552068  | 0.524160  | -1.151725 |
| C  | 3.148241  | 1.520988  | -2.037526 |
| C  | 2.168970  | 2.436969  | -1.668193 |
| C  | 1.562563  | 2.371667  | -0.408637 |
| C  | 1.975246  | 1.333603  | 0.449418  |
| C  | 1.701643  | 1.915622  | 2.878655  |
| C  | 0.673277  | 1.818519  | 3.762177  |
| C  | 0.070417  | 0.715720  | 1.904015  |
| C  | -1.657281 | 0.875998  | 3.698216  |
| C  | -1.853683 | -0.221881 | 4.547870  |
| C  | -3.130159 | -0.376643 | 5.098398  |
| C  | -4.152628 | 0.512963  | 4.794121  |
| C  | -3.926854 | 1.583331  | 3.932643  |
| C  | -2.671148 | 1.794648  | 3.359611  |
| H  | 4.318980  | -0.179078 | -1.454768 |
| H  | 3.605214  | 1.585341  | -3.020683 |
| H  | 1.871941  | 3.218248  | -2.360607 |
| H  | 2.655590  | 2.411636  | 2.941651  |
| H  | 0.551661  | 2.192919  | 4.764803  |
| H  | -3.328798 | -1.218278 | 5.751858  |
| H  | -5.142587 | 0.361006  | 5.213390  |
| H  | -4.745345 | 2.246025  | 3.679771  |
| H  | -0.471320 | 0.745851  | 0.022115  |
| O  | -1.269305 | -2.392386 | 1.678592  |
| C  | 0.542800  | 3.427652  | -0.003678 |
| C  | -0.690923 | 3.431856  | -0.922165 |
| C  | 1.199418  | 4.818954  | 0.051042  |
| H  | 0.194721  | 3.206625  | 1.007611  |
| H  | -1.226281 | 2.476560  | -0.890606 |
| H  | -1.391713 | 4.211914  | -0.606315 |
| H  | -0.414047 | 3.629973  | -1.963247 |
| H  | 2.063856  | 4.822685  | 0.724003  |
| H  | 1.543761  | 5.138106  | -0.938685 |
| H  | 0.479661  | 5.561534  | 0.412699  |
| C  | 3.441605  | -0.652014 | 1.101442  |
| C  | 4.594718  | -0.101031 | 1.963447  |
| C  | 3.863183  | -1.962248 | 0.424258  |
| H  | 2.603829  | -0.881923 | 1.762996  |
| H  | 4.302499  | 0.798095  | 2.515973  |

|                        |           |           |           |    |           |           |           |
|------------------------|-----------|-----------|-----------|----|-----------|-----------|-----------|
| H                      | 4.917552  | -0.853352 | 2.691576  | C  | 2.189289  | 2.476222  | -0.092197 |
| H                      | 5.455765  | 0.157976  | 1.336512  | C  | 2.583666  | 2.356505  | 1.198815  |
| H                      | 3.073249  | -2.335470 | -0.231432 | N  | 1.856352  | 1.306765  | 1.745619  |
| H                      | 4.781868  | -1.838940 | -0.160335 | N  | 1.228795  | 1.494666  | -0.303531 |
| H                      | 4.062329  | -2.720672 | 1.186284  | H  | 3.305879  | 2.901553  | 1.784408  |
| C                      | -0.733601 | -1.190522 | 4.889485  | H  | 2.503452  | 3.137909  | -0.881803 |
| C                      | -1.216332 | -2.645942 | 4.967426  | C  | 2.095874  | 0.844810  | 3.095122  |
| C                      | -0.043965 | -0.777791 | 6.203794  | C  | 1.650625  | 1.651263  | 4.154828  |
| H                      | 0.010051  | -1.143110 | 4.089824  | C  | 2.783154  | -0.367290 | 3.277426  |
| H                      | -1.763409 | -2.921879 | 4.063501  | C  | 1.946613  | 1.217062  | 5.449360  |
| H                      | -0.355566 | -3.313525 | 5.069257  | C  | 3.044676  | -0.756313 | 4.593972  |
| H                      | -1.862577 | -2.810805 | 5.836660  | C  | 2.637968  | 0.029900  | 5.666739  |
| H                      | 0.369815  | 0.235324  | 6.150129  | H  | 1.604785  | 1.795153  | 6.299311  |
| H                      | -0.756503 | -0.801613 | 7.036311  | H  | 3.547905  | -1.696968 | 4.781535  |
| H                      | 0.776218  | -1.465892 | 6.438240  | H  | 2.834697  | -0.300831 | 6.681904  |
| C                      | -2.420825 | 2.974144  | 2.428902  | C  | 0.708673  | 1.191231  | -1.611661 |
| C                      | -1.805376 | 4.163081  | 3.192906  | C  | -0.436923 | 1.869070  | -2.060863 |
| C                      | -3.673164 | 3.434280  | 1.670915  | C  | 1.402110  | 0.244648  | -2.382901 |
| H                      | -1.704182 | 2.644647  | 1.672926  | C  | -0.893143 | 1.562353  | -3.345664 |
| H                      | -0.864799 | 3.902190  | 3.686726  | C  | 0.897300  | -0.032757 | -3.659031 |
| H                      | -1.603328 | 4.992634  | 2.504799  | C  | -0.236992 | 0.618867  | -4.134357 |
| H                      | -2.499949 | 4.523018  | 3.960480  | H  | -1.782149 | 2.051206  | -3.727392 |
| H                      | -4.169002 | 2.601778  | 1.168852  | H  | 1.403246  | -0.761295 | -4.284904 |
| H                      | -4.393302 | 3.920334  | 2.339456  | H  | -0.614391 | 0.390870  | -5.127260 |
| H                      | -3.386250 | 4.174741  | 0.915894  | C  | -3.768399 | -0.052541 | 0.230778  |
| S                      | -4.078145 | -0.382794 | 0.771949  | C  | -3.971616 | -0.498819 | -1.075970 |
| O                      | -3.991572 | -1.247739 | 1.945842  | C  | -2.897859 | -1.004751 | -1.810484 |
| O                      | -5.218651 | 0.521265  | 0.620383  | C  | -1.627679 | -1.096128 | -1.233700 |
| O                      | -2.756981 | 0.368755  | 0.470899  | C  | -1.455369 | -0.667756 | 0.077528  |
| C                      | -4.125791 | -1.513954 | -0.708327 | C  | -2.499861 | -0.123096 | 0.818651  |
| F                      | -2.930539 | -2.122619 | -0.860899 | H  | -4.595288 | 0.352447  | 0.808006  |
| F                      | -5.064192 | -2.445594 | -0.549303 | H  | -4.960255 | -0.443643 | -1.522823 |
| F                      | -4.378719 | -0.813889 | -1.818124 | H  | -3.038973 | -1.336655 | -2.835560 |
| S                      | -0.215058 | -3.094144 | 0.855501  | H  | -0.798382 | -1.488412 | -1.807078 |
| O                      | -0.601407 | -4.299300 | 0.137883  | H  | -2.349178 | 0.198872  | 1.839891  |
| O                      | 0.504744  | -2.015773 | 0.074011  | Ni | 0.173038  | -1.011819 | 1.007091  |
| C                      | 1.017864  | -3.675048 | 2.119902  | O  | 0.307901  | -2.711346 | 0.579649  |
| F                      | 1.480406  | -2.639558 | 2.848660  | C  | -0.519031 | -3.842134 | 0.382224  |
| F                      | 2.052023  | -4.264463 | 1.515534  | C  | -0.251965 | -4.850264 | 1.501227  |
| F                      | 0.437103  | -4.547505 | 2.943877  | H  | 0.782280  | -5.209199 | 1.441084  |
|                        |           |           |           | H  | -0.392990 | -4.384317 | 2.477199  |
|                        |           |           |           | C  | -0.246040 | -4.443385 | -0.998825 |
|                        |           |           |           | H  | -0.870638 | -5.329276 | -1.162912 |
|                        |           |           |           | H  | -0.459941 | -3.721022 | -1.792212 |
| <b><sup>2</sup>IM1</b> |           |           |           |    |           |           |           |
| C                      | 1.020175  | 0.756246  | 0.821335  |    |           |           |           |

|   |           |           |           |
|---|-----------|-----------|-----------|
| H | 0.805205  | -4.743843 | -1.078758 |
| C | 2.678847  | -0.427636 | -1.897200 |
| C | 3.889513  | 0.087807  | -2.695723 |
| C | 2.587701  | -1.960848 | -1.939513 |
| H | 2.841068  | -0.147521 | -0.853685 |
| H | 3.974224  | 1.178319  | -2.629341 |
| H | 4.815423  | -0.351682 | -2.308273 |
| H | 3.806278  | -0.177851 | -3.755745 |
| H | 1.774462  | -2.325906 | -1.307359 |
| H | 2.430621  | -2.329071 | -2.959865 |
| H | 3.523359  | -2.397743 | -1.571331 |
| C | -1.139597 | 2.899379  | -1.188303 |
| C | -2.652183 | 2.970766  | -1.436289 |
| C | -0.515349 | 4.296064  | -1.378438 |
| H | -0.992409 | 2.598751  | -0.145118 |
| H | -3.112651 | 1.982614  | -1.389785 |
| H | -3.118708 | 3.603072  | -0.673229 |
| H | -2.880641 | 3.417973  | -2.410996 |
| H | 0.546218  | 4.313715  | -1.117419 |
| H | -0.612855 | 4.619550  | -2.421377 |
| H | -1.027769 | 5.029517  | -0.745757 |
| C | 3.233138  | -1.229795 | 2.104418  |
| C | 3.289119  | -2.726992 | 2.428938  |
| C | 4.570541  | -0.726572 | 1.531002  |
| H | 2.492869  | -1.127832 | 1.300148  |
| H | 2.355548  | -3.059888 | 2.888375  |
| H | 3.439820  | -3.291754 | 1.503012  |
| H | 4.122519  | -2.963320 | 3.100891  |
| H | 4.509644  | 0.320326  | 1.215234  |
| H | 5.361977  | -0.806214 | 2.285260  |
| H | 4.865086  | -1.327811 | 0.662799  |
| C | 0.802991  | 2.894853  | 3.911862  |
| C | 0.918892  | 3.936815  | 5.032913  |
| C | -0.671190 | 2.501775  | 3.689340  |
| H | 1.153465  | 3.378502  | 2.992567  |
| H | 1.963782  | 4.180771  | 5.255469  |
| H | 0.407623  | 4.858574  | 4.734915  |
| H | 0.445912  | 3.589266  | 5.957690  |
| H | -0.782040 | 1.852636  | 2.818776  |
| H | -1.051351 | 1.945187  | 4.551447  |
| H | -1.282657 | 3.400831  | 3.544213  |
| S | -0.579011 | -1.495211 | 4.126252  |
| O | 0.263953  | -2.697209 | 4.096635  |
| O | -0.657446 | -0.716985 | 5.365064  |

|   |           |           |          |
|---|-----------|-----------|----------|
| O | -0.405602 | -0.596678 | 2.911250 |
| C | -2.312024 | -2.116490 | 3.868722 |
| F | -3.178909 | -1.090105 | 3.873863 |
| F | -2.426472 | -2.751050 | 2.687221 |
| F | -2.650607 | -2.968779 | 4.840182 |
| H | -0.924502 | -5.711959 | 1.409521 |
| H | -1.568912 | -3.522943 | 0.425750 |

### <sup>2</sup>IM2

|   |           |           |           |
|---|-----------|-----------|-----------|
| C | 0.932907  | 0.461379  | 0.712825  |
| C | 2.656652  | 1.603627  | -0.205580 |
| C | 2.876775  | 1.541651  | 1.128700  |
| N | 1.806615  | 0.844173  | 1.676371  |
| N | 1.454280  | 0.939531  | -0.448978 |
| H | 3.674340  | 1.919550  | 1.746103  |
| H | 3.221721  | 2.046359  | -1.008153 |
| C | 1.600805  | 0.725078  | 3.102268  |
| C | 0.956742  | 1.792263  | 3.753967  |
| C | 2.076827  | -0.415576 | 3.763418  |
| C | 0.839841  | 1.710163  | 5.143082  |
| C | 1.932855  | -0.444688 | 5.154171  |
| C | 1.329576  | 0.607040  | 5.835442  |
| H | 0.334460  | 2.501455  | 5.685344  |
| H | 2.278056  | -1.310026 | 5.708513  |
| H | 1.208720  | 0.552303  | 6.912799  |
| C | 0.817590  | 0.996317  | -1.745842 |
| C | 0.116874  | 2.177737  | -2.064758 |
| C | 0.980952  | -0.069461 | -2.649206 |
| C | -0.452953 | 2.267099  | -3.339224 |
| C | 0.401097  | 0.083933  | -3.915073 |
| C | -0.309770 | 1.230963  | -4.256501 |
| H | -1.007504 | 3.157677  | -3.615144 |
| H | 0.499771  | -0.711090 | -4.643577 |
| H | -0.755438 | 1.316353  | -5.243449 |
| C | -3.661790 | -3.297596 | -1.461676 |
| C | -3.039405 | -3.061511 | -2.688208 |
| C | -2.409847 | -1.835991 | -2.914034 |
| C | -2.402229 | -0.855386 | -1.922949 |
| C | -3.024207 | -1.081451 | -0.687921 |
| C | -3.653418 | -2.313985 | -0.472175 |
| H | -4.149195 | -4.249531 | -1.270689 |
| H | -3.042000 | -3.826206 | -3.459785 |
| H | -1.924620 | -1.636488 | -3.864527 |

|    |           |           |           |                        |           |           |           |
|----|-----------|-----------|-----------|------------------------|-----------|-----------|-----------|
| H  | -1.916503 | 0.093395  | -2.122028 | C                      | 2.734470  | -1.559164 | 3.005692  |
| H  | -4.137554 | -2.502179 | 0.480890  | C                      | 2.402903  | -2.928801 | 3.614096  |
| C  | -1.770324 | 0.702862  | 0.623288  | C                      | 4.257982  | -1.350828 | 2.923771  |
| H  | -1.782355 | 1.365437  | 1.484862  | H                      | 2.332080  | -1.567772 | 1.988655  |
| H  | -1.387495 | 1.196620  | -0.264083 | H                      | 1.321930  | -3.054410 | 3.721271  |
| C  | -3.094497 | 0.004056  | 0.374961  | H                      | 2.778776  | -3.723330 | 2.961002  |
| H  | -3.442741 | -0.439529 | 1.308362  | H                      | 2.866457  | -3.067534 | 4.597676  |
| C  | -4.163976 | 1.057966  | -0.044564 | H                      | 4.511045  | -0.411256 | 2.420350  |
| H  | -3.865026 | 1.514935  | -0.997274 | H                      | 4.701809  | -1.324545 | 3.926214  |
| H  | -5.096340 | 0.515077  | -0.245623 | H                      | 4.727218  | -2.168536 | 2.364454  |
| C  | -4.432354 | 2.152755  | 1.002873  | C                      | 0.418847  | 2.997081  | 2.993818  |
| H  | -3.527801 | 2.750240  | 1.159068  | C                      | 1.424253  | 4.163000  | 3.022867  |
| H  | -4.654746 | 1.681014  | 1.965120  | C                      | -0.958247 | 3.457912  | 3.497080  |
| Ni | -0.514975 | -0.744905 | 1.112257  | H                      | 0.290384  | 2.699458  | 1.948867  |
| O  | 0.428754  | -2.233894 | 0.575694  | H                      | 2.392603  | 3.875701  | 2.600671  |
| C  | 0.168457  | -3.604015 | 0.812266  | H                      | 1.042120  | 5.014034  | 2.446442  |
| C  | -0.990743 | -3.851783 | 1.777867  | H                      | 1.592561  | 4.498875  | 4.052456  |
| H  | -1.122486 | -4.927136 | 1.950625  | H                      | -1.672767 | 2.631895  | 3.541067  |
| H  | -0.815259 | -3.366845 | 2.739212  | H                      | -0.893945 | 3.902583  | 4.496416  |
| H  | -1.926779 | -3.460985 | 1.363305  | H                      | -1.355246 | 4.228892  | 2.825607  |
| C  | -0.070235 | -4.314097 | -0.522599 | S                      | -2.153525 | -0.454587 | 4.019655  |
| H  | -0.268395 | -5.381820 | -0.365968 | O                      | -1.596865 | -0.370640 | 5.367819  |
| H  | -0.929464 | -3.870081 | -1.034396 | O                      | -2.974891 | 0.666401  | 3.531634  |
| H  | 0.804773  | -4.220063 | -1.169586 | O                      | -1.146312 | -0.952821 | 2.995135  |
| C  | 1.771063  | -1.319873 | -2.285819 | C                      | -3.323852 | -1.897596 | 4.092864  |
| C  | 3.288883  | -1.050127 | -2.330666 | F                      | -3.846922 | -2.154528 | 2.875350  |
| C  | 1.444095  | -2.512404 | -3.193453 | F                      | -2.691383 | -2.996943 | 4.515564  |
| H  | 1.494201  | -1.603222 | -1.263156 | F                      | -4.328505 | -1.624552 | 4.929418  |
| H  | 3.597117  | -0.280859 | -1.618614 | H                      | 1.078909  | -4.033604 | 1.263643  |
| H  | 3.835823  | -1.966403 | -2.081864 | C                      | -5.564346 | 3.052865  | 0.569965  |
| H  | 3.598744  | -0.732503 | -3.333985 | C                      | -5.315716 | 4.221616  | -0.160556 |
| H  | 0.372825  | -2.732527 | -3.198923 | C                      | -6.894460 | 2.712095  | 0.847705  |
| H  | 1.776855  | -2.346602 | -4.225508 | C                      | -6.364419 | 5.028470  | -0.603188 |
| H  | 1.968037  | -3.400455 | -2.828182 | H                      | -4.288020 | 4.503732  | -0.377741 |
| C  | 0.002189  | 3.350345  | -1.097535 | C                      | -7.947030 | 3.514447  | 0.407765  |
| C  | -1.411370 | 3.953134  | -1.047199 | H                      | -7.102139 | 1.810527  | 1.419529  |
| C  | 1.029111  | 4.444879  | -1.444253 | C                      | -7.685223 | 4.676458  | -0.320853 |
| H  | 0.233266  | 2.987707  | -0.092922 | H                      | -6.150314 | 5.934240  | -1.164553 |
| H  | -2.171586 | 3.188582  | -0.871586 | H                      | -8.971772 | 3.235565  | 0.638150  |
| H  | -1.471698 | 4.684874  | -0.234032 | H                      | -8.503684 | 5.304484  | -0.661531 |
| H  | -1.664914 | 4.474974  | -1.976399 |                        |           |           |           |
| H  | 2.052962  | 4.060316  | -1.427163 |                        |           |           |           |
| H  | 0.838768  | 4.850116  | -2.444560 | <b><sup>2</sup>TM3</b> |           |           |           |
| H  | 0.964905  | 5.268500  | -0.724230 | C                      | 0.932907  | 0.461379  | 0.712825  |

|   |           |           |           |    |           |           |           |
|---|-----------|-----------|-----------|----|-----------|-----------|-----------|
| C | 2.656652  | 1.603627  | -0.205580 | H  | -3.527801 | 2.750240  | 1.159068  |
| C | 2.876775  | 1.541651  | 1.128700  | H  | -4.654746 | 1.681014  | 1.965120  |
| N | 1.806615  | 0.844173  | 1.676371  | Ni | -0.514975 | -0.744905 | 1.112257  |
| N | 1.454280  | 0.939531  | -0.448978 | O  | 0.428754  | -2.233894 | 0.575694  |
| H | 3.674340  | 1.919550  | 1.746103  | C  | 0.168457  | -3.604015 | 0.812266  |
| H | 3.221721  | 2.046359  | -1.008153 | C  | -0.990743 | -3.851783 | 1.777867  |
| C | 1.600805  | 0.725078  | 3.102268  | H  | -1.122486 | -4.927136 | 1.950625  |
| C | 0.956742  | 1.792263  | 3.753967  | H  | -0.815259 | -3.366845 | 2.739212  |
| C | 2.076827  | -0.415576 | 3.763418  | H  | -1.926779 | -3.460985 | 1.363305  |
| C | 0.839841  | 1.710163  | 5.143082  | C  | -0.070235 | -4.314097 | -0.522599 |
| C | 1.932855  | -0.444688 | 5.154171  | H  | -0.268395 | -5.381820 | -0.365968 |
| C | 1.329576  | 0.607040  | 5.835442  | H  | -0.929464 | -3.870081 | -1.034396 |
| H | 0.334460  | 2.501455  | 5.685344  | H  | 0.804773  | -4.220063 | -1.169586 |
| H | 2.278056  | -1.310026 | 5.708513  | C  | 1.771063  | -1.319873 | -2.285819 |
| H | 1.208720  | 0.552303  | 6.912799  | C  | 3.288883  | -1.050127 | -2.330666 |
| C | 0.817590  | 0.996317  | -1.745842 | C  | 1.444095  | -2.512404 | -3.193453 |
| C | 0.116874  | 2.177737  | -2.064758 | H  | 1.494201  | -1.603222 | -1.263156 |
| C | 0.980952  | -0.069461 | -2.649206 | H  | 3.597117  | -0.280859 | -1.618614 |
| C | -0.452953 | 2.267099  | -3.339224 | H  | 3.835823  | -1.966403 | -2.081864 |
| C | 0.401097  | 0.083933  | -3.915073 | H  | 3.598744  | -0.732503 | -3.333985 |
| C | -0.309770 | 1.230963  | -4.256501 | H  | 0.372825  | -2.732527 | -3.198923 |
| H | -1.007504 | 3.157677  | -3.615144 | H  | 1.776855  | -2.346602 | -4.225508 |
| H | 0.499771  | -0.711090 | -4.643577 | H  | 1.968037  | -3.400455 | -2.828182 |
| H | -0.755438 | 1.316353  | -5.243449 | C  | 0.002189  | 3.350345  | -1.097535 |
| C | -3.661790 | -3.297596 | -1.461676 | C  | -1.411370 | 3.953134  | -1.047199 |
| C | -3.039405 | -3.061511 | -2.688208 | C  | 1.029111  | 4.444879  | -1.444253 |
| C | -2.409847 | -1.835991 | -2.914034 | H  | 0.233266  | 2.987707  | -0.092922 |
| C | -2.402229 | -0.855386 | -1.922949 | H  | -2.171586 | 3.188582  | -0.871586 |
| C | -3.024207 | -1.081451 | -0.687921 | H  | -1.471698 | 4.684874  | -0.234032 |
| C | -3.653418 | -2.313985 | -0.472175 | H  | -1.664914 | 4.474974  | -1.976399 |
| H | -4.149195 | -4.249531 | -1.270689 | H  | 2.052962  | 4.060316  | -1.427163 |
| H | -3.042000 | -3.826206 | -3.459785 | H  | 0.838768  | 4.850116  | -2.444560 |
| H | -1.924620 | -1.636488 | -3.864527 | H  | 0.964905  | 5.268500  | -0.724230 |
| H | -1.916503 | 0.093395  | -2.122028 | C  | 2.734470  | -1.559164 | 3.005692  |
| H | -4.137554 | -2.502179 | 0.480890  | C  | 2.402903  | -2.928801 | 3.614096  |
| C | -1.770324 | 0.702862  | 0.623288  | C  | 4.257982  | -1.350828 | 2.923771  |
| H | -1.782355 | 1.365437  | 1.484862  | H  | 2.332080  | -1.567772 | 1.988655  |
| H | -1.387495 | 1.196620  | -0.264083 | H  | 1.321930  | -3.054410 | 3.721271  |
| C | -3.094497 | 0.004056  | 0.374961  | H  | 2.778776  | -3.723330 | 2.961002  |
| H | -3.442741 | -0.439529 | 1.308362  | H  | 2.866457  | -3.067534 | 4.597676  |
| C | -4.163976 | 1.057966  | -0.044564 | H  | 4.511045  | -0.411256 | 2.420350  |
| H | -3.865026 | 1.514935  | -0.997274 | H  | 4.701809  | -1.324545 | 3.926214  |
| H | -5.096340 | 0.515077  | -0.245623 | H  | 4.727218  | -2.168536 | 2.364454  |
| C | -4.432354 | 2.152755  | 1.002873  | C  | 0.418847  | 2.997081  | 2.993818  |

|   |           |           |           |
|---|-----------|-----------|-----------|
| C | 1.424253  | 4.163000  | 3.022867  |
| C | -0.958247 | 3.457912  | 3.497080  |
| H | 0.290384  | 2.699458  | 1.948867  |
| H | 2.392603  | 3.875701  | 2.600671  |
| H | 1.042120  | 5.014034  | 2.446442  |
| H | 1.592561  | 4.498875  | 4.052456  |
| H | -1.672767 | 2.631895  | 3.541067  |
| H | -0.893945 | 3.902583  | 4.496416  |
| H | -1.355246 | 4.228892  | 2.825607  |
| S | -2.153525 | -0.454587 | 4.019655  |
| O | -1.596865 | -0.370640 | 5.367819  |
| O | -2.974891 | 0.666401  | 3.531634  |
| O | -1.146312 | -0.952821 | 2.995135  |
| C | -3.323852 | -1.897596 | 4.092864  |
| F | -3.846922 | -2.154528 | 2.875350  |
| F | -2.691383 | -2.996943 | 4.515564  |
| F | -4.328505 | -1.624552 | 4.929418  |
| H | 1.078909  | -4.033604 | 1.263643  |
| C | -5.564346 | 3.052865  | 0.569965  |
| C | -5.315716 | 4.221616  | -0.160556 |
| C | -6.894460 | 2.712095  | 0.847705  |
| C | -6.364419 | 5.028470  | -0.603188 |
| H | -4.288020 | 4.503732  | -0.377741 |
| C | -7.947030 | 3.514447  | 0.407765  |
| H | -7.102139 | 1.810527  | 1.419529  |
| C | -7.685223 | 4.676458  | -0.320853 |
| H | -6.150314 | 5.934240  | -1.164553 |
| H | -8.971772 | 3.235565  | 0.638150  |
| H | -8.503684 | 5.304484  | -0.661531 |

**<sup>2</sup>IM4**

|   |           |           |           |
|---|-----------|-----------|-----------|
| C | -5.725495 | -8.111796 | -0.565136 |
| C | -7.032825 | -8.262834 | -0.245187 |
| H | -4.976671 | -8.820204 | -0.880686 |
| H | -7.666197 | -9.133015 | -0.214660 |
| C | -6.514198 | -6.058720 | 0.028320  |
| N | -7.501852 | -6.997653 | 0.105084  |
| N | -5.424859 | -6.764285 | -0.382356 |
| C | -4.073566 | -6.262019 | -0.400152 |
| C | -3.621305 | -5.532747 | -1.507698 |
| C | -3.266620 | -6.540448 | 0.714993  |
| C | -2.300926 | -5.071402 | -1.481004 |
| C | -1.956064 | -6.054276 | 0.697112  |

|    |            |           |           |
|----|------------|-----------|-----------|
| C  | -1.476770  | -5.324475 | -0.387672 |
| H  | -1.916332  | -4.505346 | -2.323396 |
| H  | -1.308123  | -6.240598 | 1.548242  |
| H  | -0.456632  | -4.950928 | -0.381078 |
| C  | -8.805062  | -6.769462 | 0.672452  |
| C  | -8.893379  | -6.436171 | 2.038855  |
| C  | -9.941634  | -6.934391 | -0.142685 |
| C  | -10.174117 | -6.288219 | 2.583634  |
| C  | -11.196333 | -6.795567 | 0.461203  |
| C  | -11.314667 | -6.478950 | 1.811239  |
| H  | -10.273435 | -6.028216 | 3.632556  |
| H  | -12.090995 | -6.919055 | -0.139426 |
| H  | -12.298744 | -6.370465 | 2.258627  |
| Ni | -6.678981  | -4.062153 | 0.316379  |
| C  | -9.502903  | -2.177694 | -0.369985 |
| C  | -10.237264 | -3.146148 | 0.327941  |
| C  | -9.652388  | -0.837641 | 0.006409  |
| C  | -11.087700 | -2.784979 | 1.372885  |
| H  | -10.137953 | -4.194052 | 0.069912  |
| C  | -10.500512 | -0.470228 | 1.051797  |
| H  | -9.084661  | -0.074216 | -0.521309 |
| C  | -11.223121 | -1.445439 | 1.741026  |
| H  | -11.637132 | -3.558195 | 1.902044  |
| H  | -10.591370 | 0.576171  | 1.331537  |
| H  | -11.881068 | -1.164389 | 2.558967  |
| C  | -3.772839  | -7.326851 | 1.916378  |
| H  | -4.792986  | -7.658020 | 1.707981  |
| C  | -3.843650  | -6.444764 | 3.171947  |
| H  | -4.258427  | -7.016913 | 4.010803  |
| H  | -2.849826  | -6.088382 | 3.466361  |
| H  | -4.471610  | -5.573278 | 2.975510  |
| C  | -2.929162  | -8.590641 | 2.152874  |
| H  | -3.339931  | -9.171125 | 2.986890  |
| H  | -2.912393  | -9.232310 | 1.264183  |
| H  | -1.891803  | -8.339896 | 2.401534  |
| C  | -4.509007  | -5.278405 | -2.713335 |
| H  | -5.534021  | -5.515671 | -2.419294 |
| C  | -4.486412  | -3.807387 | -3.154134 |
| H  | -5.198943  | -3.646324 | -3.970983 |
| H  | -4.752934  | -3.147019 | -2.324191 |
| H  | -3.498169  | -3.509863 | -3.521594 |
| C  | -4.135950  | -6.217679 | -3.874133 |
| H  | -4.810374  | -6.065607 | -4.724959 |
| H  | -3.110659  | -6.032549 | -4.214957 |

|   |            |           |           |
|---|------------|-----------|-----------|
| H | -4.202188  | -7.267826 | -3.567539 |
| C | -7.682030  | -6.270506 | 2.946293  |
| H | -6.777267  | -6.313845 | 2.339956  |
| C | -7.675988  | -4.897720 | 3.639086  |
| H | -8.503938  | -4.799715 | 4.351036  |
| H | -6.737560  | -4.763159 | 4.186456  |
| H | -7.754213  | -4.087171 | 2.908380  |
| C | -7.607258  | -7.419630 | 3.966359  |
| H | -7.559877  | -8.392366 | 3.463553  |
| H | -6.712731  | -7.312742 | 4.589979  |
| H | -8.481683  | -7.425702 | 4.627579  |
| C | -9.849629  | -7.221692 | -1.635162 |
| H | -8.831216  | -6.992868 | -1.964722 |
| C | -10.133851 | -8.700328 | -1.955303 |
| H | -9.445084  | -9.378024 | -1.441049 |
| H | -11.152267 | -8.971880 | -1.653815 |
| H | -10.040161 | -8.874066 | -3.033151 |
| C | -10.802174 | -6.327226 | -2.444080 |
| H | -11.850151 | -6.599420 | -2.274672 |
| H | -10.680428 | -5.275472 | -2.176675 |
| H | -10.597737 | -6.433727 | -3.511007 |
| C | -10.099955 | -5.744119 | -6.100053 |
| C | -9.882804  | -4.483573 | -5.543122 |
| C | -8.777251  | -4.234084 | -4.717634 |
| C | -7.893847  | -5.292087 | -4.470403 |
| C | -8.105663  | -6.557738 | -5.019375 |
| C | -9.211538  | -6.790216 | -5.838703 |
| H | -10.962186 | -5.909580 | -6.740450 |
| H | -10.579121 | -3.675254 | -5.754467 |
| H | -7.030335  | -5.125083 | -3.839662 |
| H | -7.400699  | -7.358132 | -4.809737 |
| H | -9.377155  | -7.772057 | -6.273296 |
| C | -8.572299  | -2.856235 | -4.121724 |
| H | -7.508922  | -2.700776 | -3.906471 |
| H | -8.839206  | -2.115230 | -4.884380 |
| C | -9.406455  | -2.573909 | -2.838798 |
| H | -10.208009 | -3.315528 | -2.750487 |
| H | -9.906231  | -1.602851 | -2.940183 |
| C | -8.585382  | -2.547883 | -1.521665 |
| H | -7.851280  | -1.737141 | -1.623625 |
| C | -7.809645  | -3.842827 | -1.277339 |
| H | -8.479613  | -4.708857 | -1.296088 |
| H | -7.079248  | -3.994524 | -2.075598 |
| O | -5.157157  | -3.945042 | 1.323895  |

|   |           |           |           |
|---|-----------|-----------|-----------|
| H | -6.955944 | -2.634245 | 0.435497  |
| C | -4.573295 | -2.707657 | 1.677112  |
| H | -5.335162 | -2.037217 | 2.108732  |
| C | -3.981333 | -2.025204 | 0.439181  |
| H | -3.501313 | -1.072488 | 0.697662  |
| H | -3.236490 | -2.681683 | -0.025125 |
| H | -4.771729 | -1.826540 | -0.292871 |
| C | -3.490230 | -2.943100 | 2.733914  |
| H | -2.716976 | -3.611197 | 2.338193  |
| H | -3.018572 | -1.997247 | 3.028157  |
| H | -3.917932 | -3.405846 | 3.629310  |

**<sup>2</sup>IM5**

|   |           |           |           |
|---|-----------|-----------|-----------|
| C | 0.989081  | 0.654767  | 0.842690  |
| C | 2.074592  | 2.427291  | -0.091684 |
| C | 2.296192  | 2.470915  | 1.242587  |
| N | 1.636239  | 1.378262  | 1.797908  |
| N | 1.265913  | 1.319762  | -0.317776 |
| H | 2.873395  | 3.143790  | 1.855176  |
| H | 2.402292  | 3.063685  | -0.896455 |
| C | 1.856179  | 1.028690  | 3.181242  |
| C | 0.888807  | 1.371373  | 4.134372  |
| C | 3.077671  | 0.419168  | 3.501686  |
| C | 1.170380  | 1.064296  | 5.469073  |
| C | 3.315506  | 0.138106  | 4.850280  |
| C | 2.370697  | 0.451144  | 5.823751  |
| H | 0.446468  | 1.307413  | 6.239456  |
| H | 4.243195  | -0.347530 | 5.137436  |
| H | 2.569828  | 0.217429  | 6.865906  |
| C | 0.837448  | 0.903631  | -1.625414 |
| C | -0.069005 | 1.719770  | -2.323017 |
| C | 1.354671  | -0.298891 | -2.146955 |
| C | -0.484631 | 1.283279  | -3.585585 |
| C | 0.884249  | -0.699825 | -3.401765 |
| C | -0.028157 | 0.079202  | -4.111916 |
| H | -1.186847 | 1.886499  | -4.152170 |
| H | 1.244031  | -1.626945 | -3.833021 |
| H | -0.377183 | -0.252939 | -5.085634 |
| C | -3.778849 | 0.639436  | 0.933635  |
| C | -4.239205 | 0.488838  | -0.374638 |
| C | -3.387188 | -0.043861 | -1.345485 |
| C | -2.088088 | -0.431152 | -1.010414 |
| C | -1.627712 | -0.299509 | 0.304524  |



|    |           |           |           |                        |           |           |           |
|----|-----------|-----------|-----------|------------------------|-----------|-----------|-----------|
| C  | -2.477489 | 0.247468  | 1.271432  | H                      | 5.899641  | 0.364027  | 3.665883  |
| H  | -4.431345 | 1.050904  | 1.700172  | H                      | 6.175498  | 0.488028  | 1.922976  |
| H  | -5.250645 | 0.786902  | -0.637123 | C                      | -0.385018 | 2.098013  | 3.733131  |
| H  | -3.730877 | -0.158166 | -2.370744 | C                      | -0.167990 | 3.622592  | 3.777907  |
| H  | -1.447696 | -0.862581 | -1.770924 | C                      | -1.602163 | 1.698908  | 4.578021  |
| H  | -2.146955 | 0.337775  | 2.300326  | H                      | -0.608079 | 1.830642  | 2.696788  |
| Ni | 0.026390  | -1.094955 | 0.924605  | H                      | 0.646275  | 3.929384  | 3.112813  |
| O  | -0.410514 | -2.733942 | 0.284035  | H                      | -1.076813 | 4.150474  | 3.466042  |
| C  | -1.611141 | -3.409243 | -0.012961 | H                      | 0.085623  | 3.948072  | 4.793662  |
| C  | -1.923505 | -4.449737 | 1.066790  | H                      | -1.730509 | 0.612408  | 4.602831  |
| H  | -1.102061 | -5.171006 | 1.150921  | H                      | -1.516900 | 2.054421  | 5.611182  |
| H  | -2.054117 | -3.964866 | 2.038558  | H                      | -2.509793 | 2.143994  | 4.155255  |
| C  | -1.465172 | -4.054412 | -1.395378 | O                      | 0.938466  | -1.547330 | 2.500446  |
| H  | -2.380071 | -4.586666 | -1.683528 | H                      | -2.844433 | -4.996258 | 0.827255  |
| H  | -1.254162 | -3.288462 | -2.149122 | H                      | -2.450698 | -2.702664 | -0.057586 |
| H  | -0.633502 | -4.769250 | -1.392863 | C                      | 0.489617  | -2.659340 | 3.247408  |
| C  | 2.459212  | -1.078548 | -1.439615 | H                      | 0.248907  | -3.488473 | 2.566861  |
| C  | 3.830311  | -0.509422 | -1.853329 | C                      | -0.777603 | -2.286949 | 4.028170  |
| C  | 2.387879  | -2.593910 | -1.660007 | H                      | -1.162691 | -3.139940 | 4.601518  |
| H  | 2.362568  | -0.922632 | -0.362634 | H                      | -0.555104 | -1.470213 | 4.725203  |
| H  | 3.904059  | 0.560508  | -1.628166 | H                      | -1.563525 | -1.951057 | 3.342159  |
| H  | 4.632999  | -1.026367 | -1.315066 | C                      | 1.597780  | -3.116016 | 4.201121  |
| H  | 3.998329  | -0.640861 | -2.928836 | H                      | 1.885401  | -2.297335 | 4.869033  |
| H  | 1.417304  | -2.981948 | -1.339726 | H                      | 1.258854  | -3.964108 | 4.809510  |
| H  | 2.566519  | -2.870403 | -2.705738 | H                      | 2.484354  | -3.430000 | 3.642270  |
| H  | 3.162652  | -3.081009 | -1.057745 |                        |           |           |           |
| C  | -0.558972 | 3.054552  | -1.776094 |                        |           |           |           |
| C  | -2.088130 | 3.192943  | -1.791557 |                        |           |           |           |
| C  | 0.097989  | 4.212350  | -2.552122 | <b><sup>2</sup>TM6</b> |           |           |           |
| H  | -0.248912 | 3.131925  | -0.730579 | C                      | 0.366201  | 0.553944  | -2.627142 |
| H  | -2.560492 | 2.421964  | -1.181936 | C                      | -0.983965 | 0.526645  | -2.486002 |
| H  | -2.372038 | 4.174192  | -1.393745 | H                      | 0.994831  | 0.677329  | -3.494409 |
| H  | -2.494115 | 3.119821  | -2.806856 | H                      | -1.782859 | 0.620359  | -3.204044 |
| H  | 1.191926  | 4.147609  | -2.536381 | C                      | -0.078202 | 0.248897  | -0.406430 |
| H  | -0.213729 | 4.201509  | -3.602874 | N                      | -1.232321 | 0.342022  | -1.130605 |
| H  | -0.194258 | 5.177462  | -2.123067 | N                      | 0.896628  | 0.383567  | -1.353201 |
| C  | 4.108816  | 0.050483  | 2.443541  | C                      | 2.300122  | 0.347365  | -1.045934 |
| C  | 4.245502  | -1.473436 | 2.297146  | C                      | 2.939489  | 1.547919  | -0.697068 |
| C  | 5.464770  | 0.718761  | 2.724738  | C                      | 2.959965  | -0.892310 | -1.077475 |
| H  | 3.761457  | 0.425449  | 1.477476  | C                      | 4.300437  | 1.482929  | -0.379273 |
| H  | 3.272426  | -1.910622 | 2.063027  | C                      | 4.320254  | -0.904716 | -0.752294 |
| H  | 4.957889  | -1.711721 | 1.497453  | C                      | 4.984581  | 0.270389  | -0.408372 |
| H  | 4.613091  | -1.930373 | 3.223371  | H                      | 4.825741  | 2.389779  | -0.095957 |
| H  | 5.367483  | 1.808575  | 2.793101  | H                      | 4.861667  | -1.845543 | -0.756691 |
|    |           |           |           | H                      | 6.040315  | 0.239248  | -0.154126 |

|   |           |           |           |
|---|-----------|-----------|-----------|
| C | -2.539202 | 0.248843  | -0.540128 |
| C | -3.119635 | -1.021559 | -0.397096 |
| C | -3.161732 | 1.430491  | -0.104866 |
| C | -4.382319 | -1.087684 | 0.201648  |
| C | -4.422991 | 1.311716  | 0.487972  |
| C | -5.028453 | 0.066116  | 0.637987  |
| H | -4.858389 | -2.054058 | 0.336899  |
| H | -4.930774 | 2.201811  | 0.846020  |
| H | -6.006493 | -0.006314 | 1.105308  |
| C | -2.476174 | 2.784213  | -0.211477 |
| H | -1.596483 | 2.668954  | -0.852051 |
| C | -1.979168 | 3.239934  | 1.172405  |
| H | -2.820044 | 3.388721  | 1.859928  |
| H | -1.311177 | 2.492792  | 1.614526  |
| H | -1.433318 | 4.187265  | 1.090937  |
| C | -3.378278 | 3.844981  | -0.861556 |
| H | -3.729872 | 3.520238  | -1.847281 |
| H | -4.258480 | 4.061290  | -0.245978 |
| H | -2.826581 | 4.783549  | -0.986145 |
| C | -2.398841 | -2.290196 | -0.825884 |
| H | -1.487745 | -2.000056 | -1.357455 |
| C | -1.968956 | -3.107437 | 0.404979  |
| H | -1.400664 | -3.992600 | 0.096222  |
| H | -1.339919 | -2.508450 | 1.072066  |
| H | -2.841191 | -3.446061 | 0.976262  |
| C | -3.246230 | -3.131613 | -1.793903 |
| H | -4.163130 | -3.494954 | -1.316414 |
| H | -3.536022 | -2.551186 | -2.677006 |
| H | -2.679359 | -4.007332 | -2.129804 |
| C | 2.187472  | 2.867445  | -0.615683 |
| H | 1.178864  | 2.708056  | -1.008361 |
| C | 2.846920  | 3.958343  | -1.474812 |
| H | 3.851456  | 4.204861  | -1.113129 |
| H | 2.935609  | 3.642228  | -2.520263 |
| H | 2.250209  | 4.877001  | -1.443531 |
| C | 2.041281  | 3.314179  | 0.849728  |
| H | 1.542143  | 2.542427  | 1.445721  |
| H | 3.020941  | 3.508827  | 1.301534  |
| H | 1.449419  | 4.234956  | 0.911290  |
| C | 2.223084  | -2.185754 | -1.390463 |
| H | 1.229965  | -1.926954 | -1.770307 |
| C | 2.927808  | -3.009183 | -2.479875 |
| H | 3.066405  | -2.423447 | -3.395519 |
| H | 3.913683  | -3.356751 | -2.151456 |

|    |          |           |           |
|----|----------|-----------|-----------|
| H  | 2.332643 | -3.895710 | -2.726312 |
| C  | 2.022313 | -3.008252 | -0.104726 |
| H  | 2.986565 | -3.313551 | 0.318151  |
| H  | 1.490884 | -2.425039 | 0.654880  |
| H  | 1.440724 | -3.913426 | -0.315789 |
| Ni | 0.129924 | -0.010687 | 1.499395  |
| H  | 0.295171 | -0.216790 | 3.012569  |

**<sup>2</sup>IM7a**

|   |           |           |           |
|---|-----------|-----------|-----------|
| C | -1.422226 | 0.214922  | 1.279364  |
| N | -1.609340 | -0.229399 | 0.000027  |
| C | -0.513531 | -0.944414 | -0.471952 |
| C | -2.790343 | 0.066005  | -0.759741 |
| N | -0.179087 | -0.259322 | 1.596175  |
| C | 0.393521  | -0.959595 | 0.536766  |
| C | 0.451079  | -0.073851 | 2.874981  |
| C | -3.936871 | -0.719452 | -0.553216 |
| C | -2.756336 | 1.147069  | -1.656672 |
| C | -5.077949 | -0.405201 | -1.299050 |
| C | -3.967972 | -1.851785 | 0.461585  |
| C | -5.067983 | 0.646084  | -2.212520 |
| C | -3.918797 | 1.412992  | -2.388041 |
| C | -1.511427 | 2.000370  | -1.843830 |
| C | -4.892445 | -1.497432 | 1.639130  |
| C | -4.369867 | -3.188076 | -0.183261 |
| C | -1.807861 | 3.494700  | -1.643221 |
| C | -0.869198 | 1.727958  | -3.215548 |
| C | 0.382408  | -1.123078 | 3.809628  |
| C | 1.089820  | 1.148031  | 3.141758  |
| C | 0.985668  | -0.917689 | 5.054300  |
| C | -0.403065 | -2.393399 | 3.512470  |
| C | 1.623301  | 0.284739  | 5.350540  |
| C | 1.676788  | 1.301967  | 4.403163  |
| C | 1.175529  | 2.245172  | 2.091472  |
| C | -1.871156 | -2.218114 | 3.946484  |
| C | 0.210333  | -3.648931 | 4.147435  |
| C | 2.504240  | 2.134909  | 1.321275  |
| C | 0.982893  | 3.649388  | 2.677692  |
| H | -5.983291 | -0.988659 | -1.160653 |
| H | -5.962702 | 0.873219  | -2.785560 |
| H | -3.926260 | 2.237997  | -3.093610 |
| H | 0.934042  | -1.690219 | 5.813444  |
| H | 2.052742  | 0.437530  | 6.334778  |

|    |           |           |           |
|----|-----------|-----------|-----------|
| H  | 2.166980  | 2.236556  | 4.653601  |
| H  | -2.959537 | -1.973259 | 0.866075  |
| H  | -0.789727 | 1.717298  | -1.073124 |
| H  | -0.402477 | -2.546338 | 2.428069  |
| H  | 0.356514  | 2.098311  | 1.384071  |
| H  | -4.867799 | -2.286951 | 2.398996  |
| H  | -5.929767 | -1.377605 | 1.305695  |
| H  | -4.577736 | -0.559406 | 2.108265  |
| H  | -4.328985 | -3.994789 | 0.557614  |
| H  | -3.697874 | -3.446586 | -1.008960 |
| H  | -5.390639 | -3.154038 | -0.580413 |
| H  | -0.883334 | 4.074376  | -1.750085 |
| H  | -2.207119 | 3.665392  | -0.639114 |
| H  | -2.523127 | 3.872079  | -2.383393 |
| H  | 0.048812  | 2.315130  | -3.332830 |
| H  | -1.549845 | 1.999812  | -4.030975 |
| H  | -0.614187 | 0.668454  | -3.334679 |
| H  | -2.457349 | -3.110022 | 3.693806  |
| H  | -2.323185 | -1.353269 | 3.453901  |
| H  | -1.935040 | -2.062851 | 5.030238  |
| H  | -0.322550 | -4.541119 | 3.800374  |
| H  | 0.134741  | -3.631212 | 5.240353  |
| H  | 1.268165  | -3.756696 | 3.884016  |
| H  | 2.559977  | 2.902312  | 0.540333  |
| H  | 2.605390  | 1.154643  | 0.841707  |
| H  | 3.360321  | 2.269735  | 1.993431  |
| H  | 0.960600  | 4.385551  | 1.866973  |
| H  | 1.793558  | 3.932248  | 3.359562  |
| H  | 0.030058  | 3.714689  | 3.210766  |
| H  | -0.490403 | -1.363968 | -1.464777 |
| H  | 1.375332  | -1.398787 | 0.612211  |
| H  | -2.024462 | 2.866254  | 1.551912  |
| Ni | -2.522472 | 1.528505  | 2.190381  |
| C  | 0.957686  | 2.351910  | 8.373001  |
| C  | -0.212196 | 2.485816  | 7.625796  |
| C  | -1.085285 | 1.403856  | 7.452017  |
| C  | -0.751482 | 0.180743  | 8.045906  |
| C  | 0.416457  | 0.039444  | 8.796625  |
| C  | 1.277047  | 1.126255  | 8.963008  |
| H  | 1.618945  | 3.205156  | 8.499189  |
| H  | -0.454349 | 3.441665  | 7.166986  |
| H  | -1.416511 | -0.670032 | 7.915333  |
| H  | 0.652764  | -0.917592 | 9.254566  |
| H  | 2.184601  | 1.021581  | 9.551159  |

|   |           |          |          |
|---|-----------|----------|----------|
| C | -2.306131 | 1.532384 | 6.573877 |
| H | -3.027350 | 0.742902 | 6.820507 |
| H | -2.811169 | 2.490674 | 6.746620 |
| C | -1.923460 | 1.421362 | 5.078392 |
| H | -1.325436 | 0.516331 | 4.952255 |
| H | -1.266564 | 2.259566 | 4.819741 |
| C | -3.109458 | 1.394897 | 4.149032 |
| H | -3.732160 | 0.499372 | 4.210609 |
| C | -3.642105 | 2.536073 | 3.542748 |
| H | -3.210589 | 3.515273 | 3.726752 |
| H | -4.663470 | 2.543411 | 3.163124 |

### <sup>2</sup>IM7b

|   |           |           |           |
|---|-----------|-----------|-----------|
| C | 0.255926  | 0.878817  | -0.339565 |
| N | -0.896320 | 0.798117  | -1.078162 |
| C | -0.862863 | -0.268673 | -1.971756 |
| C | -2.019003 | 1.697282  | -0.953005 |
| N | 1.004784  | -0.170306 | -0.810503 |
| C | 0.335182  | -0.880143 | -1.803720 |
| C | 2.322858  | -0.511608 | -0.331302 |
| C | -3.065057 | 1.356823  | -0.071427 |
| C | -2.041941 | 2.864453  | -1.743636 |
| C | -4.151517 | 2.237164  | 0.010139  |
| C | -3.072066 | 0.062773  | 0.737477  |
| C | -4.196566 | 3.401121  | -0.751833 |
| C | -3.153548 | 3.707315  | -1.621753 |
| C | -0.937969 | 3.200028  | -2.742552 |
| C | -3.319936 | 0.305501  | 2.237003  |
| C | -4.098534 | -0.932381 | 0.157052  |
| C | -0.401305 | 4.632766  | -2.571600 |
| C | -1.420033 | 2.962359  | -4.188640 |
| C | 2.441470  | -1.420925 | 0.739742  |
| C | 3.444202  | 0.060993  | -0.966780 |
| C | 3.734165  | -1.742803 | 1.173177  |
| C | 1.235260  | -2.072530 | 1.409778  |
| C | 4.858146  | -1.188991 | 0.567215  |
| C | 4.711962  | -0.298601 | -0.493149 |
| C | 3.320365  | 1.020119  | -2.147160 |
| C | 1.182975  | -1.773248 | 2.919907  |
| C | 1.208953  | -3.590433 | 1.137221  |
| C | 3.835058  | 0.368307  | -3.446603 |
| C | 4.033241  | 2.359541  | -1.882016 |
| H | -4.973942 | 2.005716  | 0.680436  |

|    |           |           |           |
|----|-----------|-----------|-----------|
| H  | -5.049183 | 4.070159  | -0.670205 |
| H  | -3.204036 | 4.613484  | -2.218438 |
| H  | 3.859399  | -2.438360 | 1.997964  |
| H  | 5.851318  | -1.453577 | 0.920622  |
| H  | 5.595910  | 0.124120  | -0.962209 |
| H  | -2.081498 | -0.392717 | 0.654099  |
| H  | -0.099416 | 2.522070  | -2.558988 |
| H  | 0.329898  | -1.643585 | 0.971376  |
| H  | 2.259657  | 1.245014  | -2.291254 |
| H  | -3.294069 | -0.648949 | 2.776642  |
| H  | -4.298395 | 0.763103  | 2.425259  |
| H  | -2.538498 | 0.950288  | 2.649960  |
| H  | -4.069747 | -1.878161 | 0.711144  |
| H  | -3.896830 | -1.151754 | -0.898121 |
| H  | -5.118649 | -0.535518 | 0.224245  |
| H  | 0.432639  | 4.806305  | -3.262088 |
| H  | -0.039957 | 4.797645  | -1.552038 |
| H  | -1.167122 | 5.386606  | -2.787921 |
| H  | -0.612758 | 3.167090  | -4.902124 |
| H  | -2.263109 | 3.617834  | -4.437618 |
| H  | -1.748661 | 1.927341  | -4.336554 |
| H  | 0.302869  | -2.252950 | 3.364770  |
| H  | 1.104919  | -0.696018 | 3.097014  |
| H  | 2.068242  | -2.155727 | 3.442085  |
| H  | 0.311867  | -4.040399 | 1.578479  |
| H  | 2.081673  | -4.091605 | 1.572631  |
| H  | 1.203558  | -3.806651 | 0.062376  |
| H  | 3.703510  | 1.049544  | -4.295682 |
| H  | 3.295750  | -0.559408 | -3.669245 |
| H  | 4.901594  | 0.124196  | -3.375108 |
| H  | 3.872884  | 3.045843  | -2.721879 |
| H  | 5.115240  | 2.229396  | -1.764030 |
| H  | 3.649925  | 2.836652  | -0.974044 |
| H  | -1.687050 | -0.486153 | -2.632787 |
| H  | 0.770942  | -1.740784 | -2.286454 |
| Ni | 0.637511  | 2.035174  | 1.206718  |
| C  | -2.858301 | 6.464763  | 5.860541  |
| C  | -2.087502 | 6.115758  | 4.749675  |
| C  | -1.956715 | 4.778708  | 4.349772  |
| C  | -2.624838 | 3.796973  | 5.096766  |
| C  | -3.396905 | 4.139541  | 6.207574  |
| C  | -3.516509 | 5.476464  | 6.594609  |
| H  | -2.947105 | 7.509115  | 6.150076  |
| H  | -1.580650 | 6.892561  | 4.180314  |

|   |           |          |          |
|---|-----------|----------|----------|
| H | -2.538453 | 2.754335 | 4.798426 |
| H | -3.908789 | 3.362156 | 6.769797 |
| H | -4.119508 | 5.745246 | 7.458175 |
| C | -1.094500 | 4.395148 | 3.165846 |
| H | -1.551244 | 3.561675 | 2.618374 |
| H | -1.036175 | 5.243762 | 2.472536 |
| C | 0.324589  | 3.969245 | 3.585729 |
| H | 0.248214  | 3.154292 | 4.313941 |
| H | 0.799913  | 4.813009 | 4.114035 |
| C | 1.244197  | 3.534588 | 2.459641 |
| C | 1.195996  | 4.014178 | 1.148228 |
| H | 0.390416  | 4.658984 | 0.805300 |
| H | 2.094098  | 4.029926 | 0.531920 |
| H | -0.179358 | 1.403941 | 2.387221 |
| H | 2.204919  | 3.151197 | 2.814867 |

**<sup>2</sup>IM8a**

|   |           |           |           |
|---|-----------|-----------|-----------|
| C | -1.382368 | -0.045338 | 1.176000  |
| N | -1.567036 | -0.453908 | -0.111987 |
| C | -0.478613 | -1.181798 | -0.586125 |
| C | -2.748460 | -0.142456 | -0.867381 |
| N | -0.149296 | -0.543626 | 1.493831  |
| C | 0.417946  | -1.238756 | 0.432911  |
| C | 0.458586  | -0.316932 | 2.779237  |
| C | -3.800433 | -1.074651 | -0.876791 |
| C | -2.815269 | 1.095481  | -1.526430 |
| C | -4.952795 | -0.736670 | -1.593137 |
| C | -3.721957 | -2.365513 | -0.074985 |
| C | -5.046655 | 0.481562  | -2.263440 |
| C | -3.990670 | 1.387870  | -2.227876 |
| C | -1.684056 | 2.109921  | -1.457875 |
| C | -4.438324 | -2.188060 | 1.277208  |
| C | -4.270457 | -3.578880 | -0.840280 |
| C | -2.097834 | 3.323295  | -0.606315 |
| C | -1.213304 | 2.538660  | -2.857057 |
| C | 0.193991  | -1.223685 | 3.819292  |
| C | 1.231191  | 0.843116  | 2.958600  |
| C | 0.744557  | -0.944073 | 5.074339  |
| C | -0.711192 | -2.430785 | 3.628478  |
| C | 1.516138  | 0.195287  | 5.283139  |
| C | 1.757140  | 1.076807  | 4.233402  |
| C | 1.445663  | 1.851718  | 1.840466  |
| C | -2.024722 | -2.246003 | 4.409071  |

|    |           |           |           |
|----|-----------|-----------|-----------|
| C  | -0.005893 | -3.740176 | 4.016531  |
| C  | 2.938589  | 2.113785  | 1.585542  |
| C  | 0.686882  | 3.156800  | 2.138981  |
| H  | -5.789408 | -1.427258 | -1.618459 |
| H  | -5.951967 | 0.727748  | -2.811251 |
| H  | -4.080950 | 2.338806  | -2.743871 |
| H  | 0.538912  | -1.605827 | 5.909594  |
| H  | 1.897916  | 0.413333  | 6.274539  |
| H  | 2.338657  | 1.975631  | 4.414147  |
| H  | -2.667393 | -2.566636 | 0.138939  |
| H  | -0.833867 | 1.637354  | -0.957519 |
| H  | -0.970697 | -2.499119 | 2.567653  |
| H  | 1.025352  | 1.435407  | 0.920058  |
| H  | -4.340717 | -3.094924 | 1.885721  |
| H  | -5.506094 | -1.990430 | 1.125717  |
| H  | -4.015601 | -1.348347 | 1.838813  |
| H  | -4.100342 | -4.493798 | -0.262055 |
| H  | -3.781837 | -3.692726 | -1.814265 |
| H  | -5.349636 | -3.499171 | -1.011784 |
| H  | -1.267033 | 4.033501  | -0.524299 |
| H  | -2.382282 | 3.011195  | 0.404631  |
| H  | -2.950341 | 3.846940  | -1.054467 |
| H  | -0.358455 | 3.219471  | -2.775934 |
| H  | -2.002878 | 3.064155  | -3.405806 |
| H  | -0.907408 | 1.673791  | -3.456210 |
| H  | -2.695246 | -3.096490 | 4.238586  |
| H  | -2.538753 | -1.331913 | 4.093259  |
| H  | -1.835099 | -2.171869 | 5.486133  |
| H  | -0.660167 | -4.597555 | 3.821276  |
| H  | 0.253113  | -3.756060 | 5.081052  |
| H  | 0.919219  | -3.877087 | 3.445475  |
| H  | 3.065284  | 2.801185  | 0.741323  |
| H  | 3.471212  | 1.184439  | 1.354589  |
| H  | 3.421530  | 2.567812  | 2.457969  |
| H  | 0.798002  | 3.863605  | 1.308149  |
| H  | 1.070326  | 3.636300  | 3.046884  |
| H  | -0.380212 | 2.959646  | 2.286488  |
| H  | -0.453141 | -1.580998 | -1.587478 |
| H  | 1.390533  | -1.698433 | 0.506763  |
| H  | -2.493974 | 4.050900  | 3.394547  |
| Ni | -2.394863 | 1.010541  | 2.421770  |
| C  | 1.220656  | 2.428629  | 8.248671  |
| C  | 0.098785  | 2.792279  | 7.502855  |
| C  | -0.988134 | 1.919799  | 7.355650  |

|   |           |           |          |
|---|-----------|-----------|----------|
| C | -0.913294 | 0.664594  | 7.975914 |
| C | 0.204640  | 0.293365  | 8.723110 |
| C | 1.279020  | 1.175509  | 8.863586 |
| H | 2.048403  | 3.125406  | 8.354693 |
| H | 0.060125  | 3.768378  | 7.024490 |
| H | -1.745542 | -0.027378 | 7.866816 |
| H | 0.235926  | -0.682399 | 9.201644 |
| H | 2.148216  | 0.892451  | 9.451099 |
| C | -2.154728 | 2.274023  | 6.469698 |
| H | -3.067863 | 1.782716  | 6.830450 |
| H | -2.337611 | 3.354325  | 6.497084 |
| C | -1.882169 | 1.817714  | 5.012002 |
| H | -1.595489 | 0.759730  | 5.068822 |
| H | -0.977310 | 2.340793  | 4.670326 |
| C | -3.023568 | 2.011967  | 3.993485 |
| H | -3.921237 | 1.514327  | 4.402615 |
| C | -3.360200 | 3.496103  | 3.784423 |
| H | -3.674500 | 4.012796  | 4.708183 |
| H | -4.172691 | 3.622693  | 3.057981 |

**<sup>2</sup>TM8b**

|   |           |           |           |
|---|-----------|-----------|-----------|
| C | 0.084377  | 0.437387  | -0.677379 |
| N | -0.913105 | 0.089755  | -1.551366 |
| C | -0.482992 | -0.858267 | -2.474448 |
| C | -2.251417 | 0.633350  | -1.527222 |
| N | 1.145591  | -0.326377 | -1.089713 |
| C | 0.815285  | -1.120684 | -2.183263 |
| C | 2.452075  | -0.318140 | -0.473027 |
| C | -3.235283 | -0.022682 | -0.760049 |
| C | -2.527622 | 1.788083  | -2.286961 |
| C | -4.528809 | 0.513719  | -0.771970 |
| C | -2.940591 | -1.266937 | 0.071978  |
| C | -4.830189 | 1.652294  | -1.513938 |
| C | -3.838302 | 2.280590  | -2.261681 |
| C | -1.465441 | 2.507955  | -3.112114 |
| C | -3.167472 | -1.003830 | 1.573590  |
| C | -3.759832 | -2.479168 | -0.413044 |
| C | -1.232589 | 3.942023  | -2.597503 |
| C | -1.815096 | 2.502551  | -4.613309 |
| C | 2.711567  | -1.222727 | 0.576310  |
| C | 3.423895  | 0.580954  | -0.956706 |
| C | 3.992595  | -1.206932 | 1.141752  |
| C | 1.661002  | -2.190923 | 1.111218  |



|    |           |           |           |   |           |           |           |
|----|-----------|-----------|-----------|---|-----------|-----------|-----------|
| C  | 2.765267  | -3.167146 | 5.340020  | C | 5.145049  | -2.950255 | 4.492196  |
| C  | 0.598926  | -4.942651 | 5.584054  | H | 5.612422  | -3.658190 | 5.185469  |
| C  | 2.950865  | -4.458557 | 5.843273  | H | 4.844461  | -3.504794 | 3.600044  |
| C  | 1.878261  | -5.334041 | 5.970300  | H | 5.911798  | -2.219399 | 4.208977  |
| H  | -0.215805 | -5.654331 | 5.640542  | H | -0.241212 | -0.038006 | -0.042520 |
| H  | 3.948730  | -4.790781 | 6.109412  | C | -4.994121 | -4.231938 | 1.537445  |
| H  | 2.043766  | -6.340391 | 6.343694  | C | -4.021762 | -3.536658 | 0.816581  |
| Ni | 1.696307  | -1.921805 | 1.524282  | C | -2.807571 | -4.146676 | 0.478665  |
| C  | -2.023669 | 0.645234  | 2.814034  | C | -2.581738 | -5.469143 | 0.881864  |
| H  | -1.572686 | -0.247154 | 3.259140  | C | -3.553759 | -6.168253 | 1.596597  |
| C  | -3.174784 | 0.171994  | 1.910066  | C | -4.762765 | -5.552694 | 1.927230  |
| H  | -3.818788 | -0.521648 | 2.460681  | H | -5.933516 | -3.745730 | 1.787810  |
| H  | -3.799055 | 1.008897  | 1.577316  | H | -4.208267 | -2.511182 | 0.505256  |
| H  | -2.803131 | -0.345984 | 1.021610  | H | -1.627719 | -5.939270 | 0.658661  |
| C  | -2.576061 | 1.513786  | 3.959343  | H | -3.361279 | -7.192482 | 1.903335  |
| H  | -3.344500 | 0.965797  | 4.516030  | H | -5.519129 | -6.097411 | 2.485566  |
| H  | -1.791366 | 1.802406  | 4.664516  | C | -1.728931 | -3.386289 | -0.250526 |
| H  | -3.028999 | 2.430422  | 3.563948  | H | -1.132377 | -4.077526 | -0.855075 |
| C  | 2.926622  | 1.554298  | 1.886891  | H | -2.170592 | -2.647567 | -0.930038 |
| H  | 3.019857  | 0.548874  | 2.308143  | C | -0.771268 | -2.675468 | 0.743509  |
| C  | 3.833558  | 1.605630  | 0.650458  | H | -0.469861 | -3.418300 | 1.484103  |
| H  | 4.843143  | 1.285028  | 0.922618  | H | -1.312943 | -1.893330 | 1.285599  |
| H  | 3.478173  | 0.932127  | -0.133927 | C | 0.432909  | -2.102511 | 0.015242  |
| H  | 3.906870  | 2.619725  | 0.240964  | H | 0.896077  | -2.863012 | -0.609457 |
| C  | 3.404766  | 2.551671  | 2.959433  | C | 0.185862  | -0.794032 | -0.704087 |
| H  | 4.455510  | 2.366628  | 3.209715  | H | -0.535649 | -0.956066 | -1.520608 |
| H  | 3.317291  | 3.581905  | 2.594978  | H | 1.095696  | -0.386462 | -1.150279 |
| H  | 2.817555  | 2.466813  | 3.879508  | C | 3.157679  | -1.907201 | 0.288673  |
| C  | -1.029728 | -3.233480 | 4.628342  | C | 4.288558  | -1.793627 | 1.110067  |
| H  | -0.892364 | -2.547856 | 3.785822  | C | 3.332760  | -1.921134 | -1.094411 |
| C  | -1.870795 | -4.405777 | 4.110618  | C | 5.568061  | -1.666391 | 0.562719  |
| H  | -2.205768 | -5.055069 | 4.928758  | H | 4.186464  | -1.816796 | 2.194063  |
| H  | -2.765878 | -4.030089 | 3.606147  | C | 4.609883  | -1.791446 | -1.648211 |
| H  | -1.304910 | -5.012840 | 3.400894  | H | 2.484087  | -2.045761 | -1.760249 |
| C  | -1.785991 | -2.472090 | 5.733588  | C | 5.728427  | -1.658064 | -0.823122 |
| H  | -1.248153 | -1.576973 | 6.061589  | H | 6.431517  | -1.585687 | 1.218552  |
| H  | -2.772389 | -2.158909 | 5.370489  | H | 4.730388  | -1.802967 | -2.728624 |
| H  | -1.937093 | -3.116110 | 6.607951  | H | 6.719453  | -1.561587 | -1.257915 |
| C  | 3.949227  | -2.233150 | 5.142176  | O | 1.597557  | -4.996574 | 0.143939  |
| H  | 3.634890  | -1.435633 | 4.459197  | S | 1.703632  | -5.117158 | 1.605770  |
| C  | 4.366661  | -1.570772 | 6.467237  | O | 0.758125  | -6.018770 | 2.278868  |
| H  | 3.545393  | -0.992695 | 6.904217  | O | 1.839856  | -3.789423 | 2.331262  |
| H  | 4.667570  | -2.329530 | 7.198819  | C | 3.389415  | -5.833334 | 1.914379  |
| H  | 5.214270  | -0.892844 | 6.312303  | F | 3.586345  | -6.031637 | 3.225971  |

F 3.520552 -7.001764 1.277908  
 F 4.339658 -4.993015 1.471284

**<sup>2</sup>IM9b**

C 6.150212 -1.062369 6.154488  
 C 4.918034 -0.610290 6.500087  
 H 7.094808 -1.042502 6.673354  
 H 4.556611 -0.109782 7.383421  
 C 4.750496 -1.573294 4.438852  
 N 4.082525 -0.923576 5.436193  
 N 6.024918 -1.647164 4.899236  
 C 7.125688 -2.329921 4.264705  
 C 7.425064 -3.627872 4.706459  
 C 7.872523 -1.652043 3.290162  
 C 8.554470 -4.241866 4.158052  
 C 8.986118 -2.314495 2.766917  
 C 9.328280 -3.591579 3.201615  
 H 8.813940 -5.250387 4.463962  
 H 9.581393 -1.833327 1.999291  
 H 10.193642 -4.091667 2.776486  
 C 2.663718 -0.687600 5.421345  
 C 2.199633 0.602726 5.111058  
 C 1.804300 -1.759834 5.724534  
 C 0.818752 0.820875 5.167263  
 C 0.432666 -1.489304 5.760360  
 C -0.054857 -0.212276 5.498313  
 H 0.423788 1.805952 4.941175  
 H -0.261156 -2.291872 5.985812  
 H -1.124113 -0.024532 5.534488  
 C 2.323713 -3.158413 6.026235  
 H 3.362084 -3.217614 5.689774  
 C 1.548770 -4.247054 5.266230  
 H 0.516520 -4.336901 5.622567  
 H 1.520064 -4.040687 4.192542  
 H 2.035461 -5.216850 5.416464  
 C 2.319880 -3.416469 7.543532  
 H 2.926553 -2.673802 8.073838  
 H 1.301360 -3.369905 7.946341  
 H 2.727266 -4.409877 7.762613  
 C 3.150666 1.728175 4.732305  
 H 4.119455 1.279760 4.488375  
 C 2.674174 2.497196 3.488752  
 H 3.444029 3.209008 3.171595

H 2.468337 1.821799 2.652788  
 H 1.762366 3.069601 3.691165  
 C 3.365488 2.687668 5.916800  
 H 2.419993 3.156890 6.212216  
 H 3.765373 2.162926 6.790745  
 H 4.069604 3.482243 5.645760  
 C 6.551609 -4.369626 5.708962  
 H 5.806156 -3.670797 6.100445  
 C 7.364626 -4.878055 6.910352  
 H 8.107831 -5.623427 6.606667  
 H 7.897189 -4.059110 7.407328  
 H 6.702333 -5.351776 7.643894  
 C 5.780166 -5.513046 5.025683  
 H 5.169778 -5.133395 4.203330  
 H 6.465711 -6.260394 4.612315  
 H 5.129079 -6.014616 5.752264  
 C 7.508194 -0.242905 2.848194  
 H 6.434042 -0.113106 3.009754  
 C 8.234230 0.800303 3.718221  
 H 7.983858 0.684849 4.778611  
 H 9.320856 0.698326 3.615740  
 H 7.957916 1.816439 3.412658  
 C 7.773222 0.002132 1.355584  
 H 8.846360 0.062876 1.140291  
 H 7.348278 -0.799024 0.746014  
 H 7.327719 0.956146 1.051349  
 Ni 3.708611 -2.117907 2.760014  
 H 2.143164 0.051989 0.658341  
 H 4.031874 0.168444 2.345349  
 C 4.561820 -3.436391 -4.460942  
 C 4.631216 -2.919505 -3.166977  
 C 4.627407 -1.534059 -2.953076  
 C 4.551064 -0.685408 -4.064440  
 C 4.482026 -1.200188 -5.359864  
 C 4.487308 -2.580890 -5.562354  
 H 4.569129 -4.513349 -4.609355  
 H 4.685515 -3.584802 -2.311181  
 H 4.549622 0.392032 -3.910943  
 H 4.428083 -0.523693 -6.209236  
 H 4.436436 -2.986446 -6.569465  
 C 4.657722 -0.966207 -1.552527  
 H 5.347638 -1.547806 -0.934181  
 H 5.043784 0.062409 -1.589232  
 C 3.258954 -0.949475 -0.902847



|                         |           |           |           |    |           |           |           |
|-------------------------|-----------|-----------|-----------|----|-----------|-----------|-----------|
| H                       | 2.947483  | -1.975868 | -0.685537 | C  | 1.340314  | -2.869154 | 4.775563  |
| H                       | 2.542101  | -0.543594 | -1.627924 | C  | 0.225558  | -3.715766 | 4.867698  |
| C                       | 3.188051  | -0.097934 | 0.368738  | C  | 2.641094  | -3.257956 | 5.122252  |
| H                       | 3.578066  | 0.907736  | 0.126793  | C  | 0.444369  | -4.999380 | 5.373747  |
| C                       | 3.992549  | -0.588480 | 1.554458  | C  | 2.804083  | -4.548399 | 5.634515  |
| H                       | 5.007577  | -0.895729 | 1.284828  | C  | 1.717142  | -5.406627 | 5.765166  |
| C                       | 2.038459  | -2.414708 | 1.924967  | H  | -0.383290 | -5.695384 | 5.440946  |
| C                       | 0.996245  | -1.579372 | 2.351561  | H  | 3.796985  | -4.894705 | 5.902875  |
| C                       | 1.735332  | -3.625044 | 1.288822  | H  | 1.866296  | -6.412024 | 6.148158  |
| C                       | -0.334612 | -1.972328 | 2.196240  | Ni | 1.179876  | -1.966614 | 1.288094  |
| H                       | 1.208635  | -0.626121 | 2.826438  | C  | -1.658287 | 0.456771  | 1.821180  |
| C                       | 0.399789  | -4.008111 | 1.126362  | H  | -1.305575 | -0.541709 | 2.099938  |
| H                       | 2.530127  | -4.256024 | 0.911980  | C  | -2.703708 | 0.281240  | 0.711984  |
| C                       | -0.635167 | -3.189918 | 1.583205  | H  | -3.459548 | -0.442222 | 1.035307  |
| H                       | -1.131064 | -1.325129 | 2.555032  | H  | -3.222747 | 1.221594  | 0.493145  |
| H                       | 0.172508  | -4.949867 | 0.633130  | H  | -2.261832 | -0.087389 | -0.217805 |
| H                       | -1.670132 | -3.494285 | 1.451680  | C  | -2.327984 | 1.072299  | 3.066307  |
| O                       | 4.460679  | -4.151145 | -0.123857 | H  | -3.189045 | 0.465889  | 3.368789  |
| S                       | 5.466248  | -3.969862 | 0.935351  | H  | -1.642641 | 1.124817  | 3.915552  |
| O                       | 6.607723  | -3.095092 | 0.634495  | H  | -2.683180 | 2.086206  | 2.847919  |
| O                       | 4.865974  | -3.719280 | 2.308479  | C  | 3.178505  | 1.894989  | 2.631689  |
| C                       | 6.158865  | -5.677847 | 1.179322  | H  | 2.890162  | 1.743728  | 3.677629  |
| F                       | 6.594302  | -6.149110 | 0.006715  | C  | 4.026302  | 0.675052  | 2.219203  |
| F                       | 7.179983  | -5.674964 | 2.045416  | H  | 4.881951  | 0.575104  | 2.896973  |
| F                       | 5.204658  | -6.493612 | 1.649102  | H  | 3.454599  | -0.254192 | 2.251872  |
| <b><sup>2</sup>TS10</b> |           |           |           | H  | 4.403872  | 0.788813  | 1.199759  |
| C                       | 0.831004  | 0.664150  | 4.552463  | C  | 4.030144  | 3.170990  | 2.585767  |
| C                       | 1.001222  | -0.475075 | 5.266288  | H  | 4.857764  | 3.085329  | 3.297582  |
| H                       | 0.686739  | 1.688687  | 4.855046  | H  | 4.472285  | 3.327261  | 1.595275  |
| H                       | 1.044999  | -0.659926 | 6.327108  | H  | 3.447243  | 4.061809  | 2.844856  |
| C                       | 1.059377  | -1.055867 | 3.065391  | C  | -1.157903 | -3.255658 | 4.429415  |
| N                       | 1.134188  | -1.508379 | 4.346138  | H  | -1.019036 | -2.545984 | 3.606095  |
| N                       | 0.866981  | 0.290005  | 3.214276  | C  | -2.018786 | -4.403356 | 3.890951  |
| C                       | 0.768558  | 1.210859  | 2.116301  | H  | -2.360653 | -5.064090 | 4.696775  |
| C                       | 1.891934  | 2.004210  | 1.817054  | H  | -2.910700 | -4.008564 | 3.394742  |
| C                       | -0.442271 | 1.277311  | 1.399846  | H  | -1.461708 | -5.004327 | 3.170547  |
| C                       | 1.777718  | 2.886693  | 0.737109  | C  | -1.887024 | -2.511840 | 5.564057  |
| C                       | -0.495351 | 2.167966  | 0.321139  | H  | -1.330307 | -1.632404 | 5.903194  |
| C                       | 0.602613  | 2.961565  | -0.006391 | H  | -2.874837 | -2.176740 | 5.225815  |
| H                       | 2.618013  | 3.516069  | 0.468384  | H  | -2.030873 | -3.175063 | 6.425190  |
| H                       | -1.403886 | 2.248419  | -0.264373 | C  | 3.844566  | -2.358384 | 4.883312  |
| H                       | 0.539499  | 3.646304  | -0.847320 | H  | 3.482223  | -1.352923 | 4.648009  |
|                         |           |           |           | C  | 4.740760  | -2.237209 | 6.125314  |
|                         |           |           |           | H  | 4.174047  | -1.883780 | 6.994371  |

|   |           |           |           |                          |           |           |           |
|---|-----------|-----------|-----------|--------------------------|-----------|-----------|-----------|
| H | 5.195670  | -3.197808 | 6.390907  | C                        | 3.271430  | -6.009894 | 1.873837  |
| H | 5.555895  | -1.529402 | 5.936023  | F                        | 3.446237  | -6.068538 | 3.199970  |
| C | 4.639797  | -2.850596 | 3.659966  | F                        | 3.310285  | -7.253434 | 1.383403  |
| H | 5.027234  | -3.861361 | 3.826802  | F                        | 4.289587  | -5.308109 | 1.345251  |
| H | 4.006758  | -2.885465 | 2.770827  |                          |           |           |           |
| H | 5.488865  | -2.184508 | 3.465084  |                          |           |           |           |
| H | -0.409643 | -0.591390 | -1.285257 |                          |           |           |           |
| C | -4.961219 | -4.396317 | 1.123925  | <b><sup>2</sup>TS11a</b> |           |           |           |
| C | -3.868385 | -3.931906 | 0.392363  | C                        | 0.534029  | -3.158246 | 0.410345  |
| C | -2.703266 | -4.702153 | 0.272726  | C                        | -0.788136 | -3.038316 | 0.686817  |
| C | -2.656028 | -5.950761 | 0.902726  | H                        | 1.189150  | -4.013081 | 0.412412  |
| C | -3.750837 | -6.422258 | 1.628833  | H                        | -1.524802 | -3.762278 | 0.992751  |
| C | -4.905475 | -5.647309 | 1.743794  | C                        | -0.007419 | -0.968063 | 0.160829  |
| H | -5.858319 | -3.787718 | 1.203877  | N                        | -1.100345 | -1.693450 | 0.527818  |
| H | -3.920783 | -2.963049 | -0.100958 | N                        | 0.997990  | -1.885435 | 0.096848  |
| H | -1.743670 | -6.537156 | 0.847446  | C                        | 2.399235  | -1.586458 | -0.117616 |
| H | -3.696050 | -7.393203 | 2.113454  | C                        | 2.972459  | -1.869354 | -1.368015 |
| H | -5.756459 | -6.013345 | 2.311630  | C                        | 3.137799  | -1.065023 | 0.965502  |
| C | -1.512670 | -4.183244 | -0.494813 | C                        | 4.333111  | -1.580078 | -1.530249 |
| H | -0.779276 | -4.979980 | -0.640558 | C                        | 4.489669  | -0.791491 | 0.744742  |
| H | -1.830619 | -3.841811 | -1.487569 | C                        | 5.081259  | -1.039800 | -0.491548 |
| C | -0.809299 | -3.014360 | 0.243359  | H                        | 4.805598  | -1.779432 | -2.486031 |
| H | -0.534942 | -3.401882 | 1.233190  | H                        | 5.086474  | -0.372986 | 1.546625  |
| H | -1.526688 | -2.206052 | 0.415785  | H                        | 6.133072  | -0.812588 | -0.641865 |
| C | 0.386412  | -2.503339 | -0.600188 | C                        | -2.343844 | -1.096153 | 0.946352  |
| H | 0.913420  | -3.362425 | -1.003963 | C                        | -2.397632 | -0.574405 | 2.252261  |
| C | -0.104621 | -1.561632 | -1.690956 | C                        | -3.439560 | -1.076588 | 0.065848  |
| H | -0.984099 | -1.997061 | -2.182644 | C                        | -3.589135 | 0.041279  | 2.652402  |
| H | 0.655284  | -1.381689 | -2.453519 | C                        | -4.609362 | -0.456880 | 0.519686  |
| C | 2.241027  | -1.564997 | -0.270985 | C                        | -4.682538 | 0.104594  | 1.792460  |
| C | 3.345989  | -2.397478 | -0.505011 | H                        | -3.664372 | 0.458195  | 3.652329  |
| C | 2.289137  | -0.225985 | -0.681501 | H                        | -5.473717 | -0.415475 | -0.134036 |
| C | 4.503463  | -1.869937 | -1.080410 | H                        | -5.601904 | 0.582282  | 2.120511  |
| H | 3.301815  | -3.445378 | -0.238366 | Ni                       | 0.014937  | 0.981483  | -0.433004 |
| C | 3.446617  | 0.291438  | -1.264450 | C                        | -0.572549 | 2.984681  | -0.474037 |
| H | 1.430355  | 0.420433  | -0.552794 | C                        | -1.440171 | 2.674543  | 0.586058  |
| C | 4.560513  | -0.526598 | -1.461840 | C                        | -0.997282 | 3.617008  | -1.647528 |
| H | 5.359148  | -2.519861 | -1.243555 | C                        | -2.822022 | 2.774946  | 0.338080  |
| H | 3.470593  | 1.336875  | -1.561550 | H                        | -1.064501 | 2.390515  | 1.562021  |
| H | 5.459570  | -0.126559 | -1.922420 | C                        | -2.363927 | 3.711152  | -1.857719 |
| O | 1.648463  | -5.282386 | -0.050435 | H                        | -0.275810 | 3.926992  | -2.392205 |
| S | 1.656665  | -5.207564 | 1.423414  | C                        | -3.275626 | 3.275653  | -0.875710 |
| O | 0.609863  | -5.957597 | 2.132796  | H                        | -3.519584 | 2.477912  | 1.112868  |
| O | 1.871737  | -3.812285 | 1.960792  | H                        | -2.731629 | 4.108846  | -2.799448 |
|   |           |           |           | H                        | -4.342181 | 3.360721  | -1.059124 |

|   |           |           |           |
|---|-----------|-----------|-----------|
| O | 1.001139  | 3.915792  | 0.174395  |
| S | 2.164609  | 2.991169  | 0.501706  |
| O | 3.041249  | 3.454784  | 1.569404  |
| O | 1.690927  | 1.570167  | 0.629768  |
| C | 3.170648  | 2.996007  | -1.066813 |
| F | 3.843050  | 4.144595  | -1.155606 |
| F | 4.026644  | 1.975963  | -1.050919 |
| F | 2.359705  | 2.880280  | -2.122304 |
| C | 2.515677  | -0.859130 | 2.340696  |
| H | 1.490449  | -0.519054 | 2.185859  |
| C | 3.217224  | 0.209006  | 3.188926  |
| H | 2.634000  | 0.389657  | 4.098771  |
| H | 4.214351  | -0.116496 | 3.507995  |
| H | 3.311927  | 1.156587  | 2.655902  |
| C | 2.467466  | -2.188554 | 3.120598  |
| H | 1.990831  | -2.038772 | 4.097011  |
| H | 1.904548  | -2.960262 | 2.588741  |
| H | 3.481443  | -2.567390 | 3.294204  |
| C | 2.192997  | -2.526767 | -2.494507 |
| H | 1.128694  | -2.372192 | -2.313887 |
| C | 2.505508  | -1.922812 | -3.872412 |
| H | 1.792705  | -2.308027 | -4.607946 |
| H | 2.415596  | -0.835142 | -3.849972 |
| H | 3.513786  | -2.186287 | -4.213570 |
| C | 2.461233  | -4.044437 | -2.511952 |
| H | 1.876419  | -4.523695 | -3.305217 |
| H | 3.522043  | -4.249848 | -2.698596 |
| H | 2.195470  | -4.521141 | -1.562220 |
| C | -1.253150 | -0.733581 | 3.246417  |
| H | -0.466691 | -1.325338 | 2.773753  |
| C | -0.627400 | 0.609532  | 3.655995  |
| H | -1.383923 | 1.306919  | 4.033957  |
| H | 0.112993  | 0.457138  | 4.448853  |
| H | -0.109419 | 1.078501  | 2.815245  |
| C | -1.718924 | -1.524129 | 4.482693  |
| H | -2.159924 | -2.484149 | 4.193622  |
| H | -0.868668 | -1.722154 | 5.144954  |
| H | -2.469040 | -0.970450 | 5.058139  |
| C | -3.395433 | -1.768355 | -1.286369 |
| H | -2.354301 | -1.819344 | -1.607256 |
| C | -3.926957 | -3.209505 | -1.155108 |
| H | -3.350603 | -3.794521 | -0.430665 |
| H | -4.973515 | -3.211322 | -0.827562 |
| H | -3.870486 | -3.721676 | -2.122017 |

|   |           |           |           |
|---|-----------|-----------|-----------|
| C | -4.170399 | -1.016072 | -2.377842 |
| H | -5.255072 | -1.080487 | -2.227486 |
| H | -3.875145 | 0.034120  | -2.411404 |
| H | -3.945415 | -1.461966 | -3.352194 |
| O | -1.545395 | 0.595327  | -2.048441 |
| S | -0.506519 | 0.075995  | -2.994802 |
| C | -0.706524 | 1.080855  | -4.545692 |
| F | -0.421238 | 2.370311  | -4.324577 |
| F | 0.118671  | 0.614264  | -5.486062 |
| F | -1.968959 | 0.986612  | -4.975601 |
| O | -0.675552 | -1.311126 | -3.438221 |
| O | 0.845282  | 0.468182  | -2.462886 |

**<sup>2</sup>TS11c**

|    |           |           |           |
|----|-----------|-----------|-----------|
| C  | 3.268485  | -0.640490 | 0.724630  |
| C  | 2.724430  | -1.882805 | 0.693182  |
| H  | 4.242597  | -0.294251 | 1.027220  |
| H  | 3.120676  | -2.846297 | 0.969219  |
| C  | 1.140669  | -0.434752 | -0.040675 |
| N  | 1.418187  | -1.738659 | 0.228401  |
| N  | 2.284325  | 0.232703  | 0.274602  |
| C  | 2.362305  | 1.675919  | 0.334914  |
| C  | 2.959121  | 2.381249  | -0.724111 |
| C  | 1.818084  | 2.309205  | 1.472747  |
| C  | 3.034696  | 3.774049  | -0.597694 |
| C  | 1.916017  | 3.700981  | 1.539968  |
| C  | 2.524253  | 4.425835  | 0.519083  |
| H  | 3.485530  | 4.355820  | -1.392716 |
| H  | 1.501965  | 4.225031  | 2.393563  |
| H  | 2.588937  | 5.508060  | 0.589587  |
| C  | 0.440098  | -2.798670 | 0.339686  |
| C  | -0.060320 | -3.064000 | 1.627539  |
| C  | 0.062398  | -3.539219 | -0.795586 |
| C  | -0.955209 | -4.130095 | 1.770776  |
| C  | -0.829770 | -4.597799 | -0.591930 |
| C  | -1.329137 | -4.895915 | 0.673339  |
| H  | -1.357866 | -4.359048 | 2.752903  |
| H  | -1.145701 | -5.193686 | -1.439536 |
| H  | -2.020222 | -5.724813 | 0.799594  |
| Ni | -0.276269 | 0.430462  | -1.065007 |
| C  | -2.217169 | -0.198668 | -0.964790 |
| C  | -2.671658 | -0.226667 | 0.353930  |
| C  | -2.560793 | -1.131639 | -1.937658 |

|   |           |           |           |
|---|-----------|-----------|-----------|
| C | -3.370316 | -1.370796 | 0.747457  |
| H | -2.445755 | 0.567464  | 1.053385  |
| C | -3.266258 | -2.252788 | -1.503026 |
| H | -2.248909 | -0.997232 | -2.968509 |
| C | -3.664223 | -2.380622 | -0.168894 |
| H | -3.688382 | -1.458741 | 1.781753  |
| H | -3.512892 | -3.027435 | -2.222644 |
| H | -4.213740 | -3.259275 | 0.151738  |
| O | -1.948214 | 1.361634  | -1.743645 |
| S | -2.051132 | 2.703453  | -0.875414 |
| O | -3.418738 | 3.179188  | -0.763884 |
| O | -1.213655 | 2.521239  | 0.321613  |
| C | -1.109073 | 3.845910  | -2.025842 |
| F | -1.659497 | 3.832605  | -3.226593 |
| F | -1.175067 | 5.071538  | -1.501416 |
| F | 0.160775  | 3.455651  | -2.081434 |
| C | 1.166877  | 1.520419  | 2.602209  |
| H | 0.689625  | 0.643510  | 2.156369  |
| C | 0.063809  | 2.295318  | 3.336703  |
| H | -0.457269 | 1.620702  | 4.024943  |
| H | 0.472307  | 3.115343  | 3.938338  |
| H | -0.665444 | 2.706250  | 2.635174  |
| C | 2.225191  | 1.027142  | 3.608014  |
| H | 1.752819  | 0.434285  | 4.400251  |
| H | 2.985896  | 0.403655  | 3.130094  |
| H | 2.730783  | 1.878783  | 4.077851  |
| C | 3.521199  | 1.680441  | -1.953230 |
| H | 2.954453  | 0.756727  | -2.102889 |
| C | 3.367264  | 2.518238  | -3.231812 |
| H | 3.712561  | 1.940327  | -4.091189 |
| H | 2.323751  | 2.786424  | -3.412285 |
| H | 3.969572  | 3.433027  | -3.193198 |
| C | 5.002207  | 1.313693  | -1.737104 |
| H | 5.394961  | 0.793012  | -2.617545 |
| H | 5.604457  | 2.216142  | -1.577918 |
| H | 5.143250  | 0.660361  | -0.870259 |
| C | 0.342401  | -2.253579 | 2.852409  |
| H | 1.037348  | -1.472616 | 2.540980  |
| C | -0.866074 | -1.547503 | 3.487314  |
| H | -1.618193 | -2.266352 | 3.831330  |
| H | -0.547787 | -0.955405 | 4.352802  |
| H | -1.343452 | -0.876294 | 2.768646  |
| C | 1.081773  | -3.126984 | 3.880046  |
| H | 1.962299  | -3.602374 | 3.434124  |

|   |           |           |           |
|---|-----------|-----------|-----------|
| H | 1.415080  | -2.518020 | 4.728072  |
| H | 0.435821  | -3.921590 | 4.269776  |
| C | 0.601976  | -3.215361 | -2.180900 |
| H | 0.619894  | -2.128231 | -2.284391 |
| C | 2.049238  | -3.716339 | -2.353032 |
| H | 2.723007  | -3.285752 | -1.606311 |
| H | 2.096993  | -4.808761 | -2.267707 |
| H | 2.420311  | -3.430006 | -3.342289 |
| C | -0.280392 | -3.762702 | -3.310991 |
| H | -0.227625 | -4.856372 | -3.376723 |
| H | -1.326199 | -3.474982 | -3.176404 |
| H | 0.051882  | -3.353860 | -4.265460 |
| O | 0.621576  | 0.025137  | -2.825380 |
| S | 0.144179  | 0.364034  | -4.231689 |
| O | -1.066230 | -0.375871 | -4.620534 |
| O | 0.214062  | 1.795145  | -4.541887 |
| C | 1.512585  | -0.426854 | -5.219259 |
| F | 2.718425  | -0.074661 | -4.747623 |
| F | 1.422192  | -0.050626 | -6.496354 |
| F | 1.430591  | -1.767492 | -5.161291 |

**<sup>2</sup>TS11b**

|    |           |           |           |
|----|-----------|-----------|-----------|
| Ni | 8.233996  | -3.452376 | -0.712820 |
| C  | 8.524577  | -1.697272 | 0.031733  |
| C  | 8.925607  | 0.504759  | 0.218086  |
| C  | 8.834812  | 0.001451  | 1.474543  |
| N  | 8.595236  | -1.362827 | 1.344760  |
| N  | 8.750871  | -0.557457 | -0.661853 |
| H  | 8.918311  | 0.474332  | 2.436800  |
| H  | 9.114226  | 1.502775  | -0.140741 |
| C  | 8.603248  | -2.341963 | 2.407718  |
| C  | 9.617115  | -3.332153 | 2.373351  |
| C  | 7.621807  | -2.296437 | 3.417096  |
| C  | 9.545434  | -4.359139 | 3.320602  |
| C  | 7.627145  | -3.335948 | 4.358194  |
| C  | 8.551604  | -4.371185 | 4.295310  |
| H  | 10.291513 | -5.144463 | 3.310747  |
| H  | 6.873986  | -3.338672 | 5.136881  |
| H  | 8.514142  | -5.178353 | 5.021283  |
| C  | 9.114130  | -0.489608 | -2.066218 |
| C  | 8.119480  | -0.293185 | -3.035726 |
| C  | 10.480873 | -0.615359 | -2.380164 |
| C  | 8.535321  | -0.229654 | -4.369730 |

|   |           |           |           |                         |           |           |           |
|---|-----------|-----------|-----------|-------------------------|-----------|-----------|-----------|
| C | 10.838669 | -0.545103 | -3.729935 | H                       | 12.725590 | -2.112044 | 1.488041  |
| C | 9.876217  | -0.358683 | -4.715702 | C                       | 6.663220  | -0.107441 | -2.659635 |
| H | 7.794656  | -0.086661 | -5.147990 | C                       | 5.703179  | -0.693871 | -3.704483 |
| H | 11.881416 | -0.648773 | -4.009966 | C                       | 6.374673  | 1.387531  | -2.421828 |
| H | 10.172729 | -0.318271 | -5.759758 | H                       | 6.475498  | -0.619527 | -1.714106 |
| C | 5.263154  | -5.364195 | 1.080433  | H                       | 5.976005  | -1.725991 | -3.952583 |
| C | 4.369372  | -5.510050 | 0.020080  | H                       | 4.684674  | -0.686756 | -3.313172 |
| C | 4.489167  | -4.726251 | -1.132075 | H                       | 5.702049  | -0.114280 | -4.635149 |
| C | 5.510467  | -3.783566 | -1.237877 | H                       | 7.020373  | 1.795958  | -1.636725 |
| C | 6.421586  | -3.725225 | -0.188459 | H                       | 6.544758  | 1.968910  | -3.336406 |
| C | 6.288734  | -4.414659 | 1.012148  | H                       | 5.338916  | 1.523631  | -2.103949 |
| H | 5.150524  | -5.954032 | 1.985062  | C                       | 11.565015 | -0.770156 | -1.323153 |
| H | 3.547384  | -6.214221 | 0.105131  | C                       | 12.345006 | 0.547015  | -1.159119 |
| H | 3.766309  | -4.814884 | -1.937017 | C                       | 12.515617 | -1.939710 | -1.624378 |
| H | 5.599336  | -3.137919 | -2.100411 | H                       | 11.087743 | -0.979627 | -0.363782 |
| H | 6.947159  | -4.252044 | 1.854571  | H                       | 13.097149 | 0.451555  | -0.367519 |
| O | 5.661673  | -1.195235 | 0.176621  | H                       | 12.860920 | 0.813795  | -2.088239 |
| S | 4.286990  | -1.136820 | 0.771934  | H                       | 11.677790 | 1.375719  | -0.898465 |
| O | 3.795041  | -2.436626 | 1.266265  | H                       | 11.967012 | -2.878229 | -1.728180 |
| O | 4.068122  | 0.042957  | 1.626597  | H                       | 13.079498 | -1.774363 | -2.548179 |
| C | 3.182497  | -0.818168 | -0.687868 | H                       | 13.243890 | -2.047319 | -0.812459 |
| F | 3.474032  | 0.354822  | -1.281695 | S                       | 9.404565  | -4.192758 | -2.971394 |
| F | 1.901234  | -0.783851 | -0.307880 | O                       | 8.117276  | -3.411310 | -2.839889 |
| F | 3.312700  | -1.788327 | -1.621459 | O                       | 10.341504 | -3.830562 | -4.019062 |
| O | 9.945258  | -4.297445 | -1.551332 | C                       | 8.825170  | -5.927442 | -3.319926 |
| C | 6.607271  | -1.172784 | 3.554693  | F                       | 8.179648  | -5.960443 | -4.483145 |
| C | 7.134354  | -0.107342 | 4.539341  | F                       | 7.992563  | -6.314421 | -2.340488 |
| C | 5.232539  | -1.661179 | 4.040456  | F                       | 9.869656  | -6.752490 | -3.357073 |
| H | 6.463707  | -0.709383 | 2.575939  |                         |           |           |           |
| H | 8.129840  | 0.268224  | 4.277913  |                         |           |           |           |
| H | 6.444416  | 0.742197  | 4.568677  | <b><sup>2</sup>TS12</b> |           |           |           |
| H | 7.206656  | -0.524588 | 5.550789  | C                       | 0.640306  | 0.496368  | 0.942906  |
| H | 4.856860  | -2.482317 | 3.427261  | C                       | 2.289058  | 1.605607  | -0.161468 |
| H | 5.265147  | -1.974527 | 5.090954  | C                       | 2.699047  | 1.416117  | 1.114805  |
| H | 4.514429  | -0.844094 | 3.948580  | N                       | 1.672112  | 0.753549  | 1.784492  |
| C | 10.849262 | -3.223667 | 1.476709  | N                       | 1.016601  | 1.049823  | -0.252858 |
| C | 11.544094 | -4.561483 | 1.195618  | H                       | 3.606658  | 1.691163  | 1.625571  |
| C | 11.832723 | -2.220548 | 2.112786  | H                       | 2.763165  | 2.084295  | -1.001327 |
| H | 10.560337 | -2.821375 | 0.506073  | C                       | 1.707401  | 0.663801  | 3.237086  |
| H | 10.842266 | -5.308140 | 0.812121  | C                       | 1.197857  | 1.757427  | 3.966481  |
| H | 12.315375 | -4.413522 | 0.434617  | C                       | 2.365131  | -0.416624 | 3.840934  |
| H | 12.033125 | -4.966182 | 2.088722  | C                       | 1.399883  | 1.756202  | 5.347941  |
| H | 11.377408 | -1.231827 | 2.229894  | C                       | 2.550826  | -0.358064 | 5.226294  |
| H | 12.146885 | -2.568352 | 3.103431  | C                       | 2.082679  | 0.716281  | 5.971028  |

|    |           |           |           |   |           |           |           |
|----|-----------|-----------|-----------|---|-----------|-----------|-----------|
| H  | 1.008683  | 2.573768  | 5.943279  | H | 0.153998  | -1.722974 | -4.367702 |
| H  | 3.043955  | -1.182821 | 5.726905  | H | 1.069766  | -2.804648 | -3.320563 |
| H  | 2.226430  | 0.732578  | 7.047462  | C | -0.302097 | 3.630758  | -0.342459 |
| C  | 0.097719  | 1.299323  | -1.345469 | C | -1.521855 | 4.396817  | 0.189578  |
| C  | -0.634963 | 2.509258  | -1.318526 | C | 0.673503  | 4.617064  | -1.016447 |
| C  | -0.026146 | 0.366038  | -2.390709 | H | 0.216038  | 3.199922  | 0.515165  |
| C  | -1.611416 | 2.702555  | -2.300761 | H | -2.256677 | 3.734582  | 0.654755  |
| C  | -1.016478 | 0.613933  | -3.353498 | H | -1.197421 | 5.120003  | 0.945244  |
| C  | -1.819818 | 1.748357  | -3.293474 | H | -2.031754 | 4.952763  | -0.603077 |
| H  | -2.219801 | 3.599682  | -2.290079 | H | 1.574594  | 4.111196  | -1.375096 |
| H  | -1.156962 | -0.094843 | -4.160880 | H | 0.197126  | 5.101466  | -1.876240 |
| H  | -2.600524 | 1.906375  | -4.030930 | H | 0.978486  | 5.394835  | -0.307606 |
| C  | -3.729643 | -3.940949 | 0.412046  | C | 2.858604  | -1.606507 | 3.041523  |
| C  | -3.971734 | -3.849420 | -0.959021 | C | 2.585306  | -2.936755 | 3.759501  |
| C  | -3.446827 | -2.781969 | -1.689436 | C | 4.352092  | -1.467708 | 2.697656  |
| C  | -2.702930 | -1.793279 | -1.041555 | H | 2.311050  | -1.629901 | 2.098269  |
| C  | -2.491156 | -1.892940 | 0.330970  | H | 1.531079  | -3.021118 | 4.032659  |
| C  | -2.988797 | -2.955489 | 1.073335  | H | 2.837755  | -3.762806 | 3.092090  |
| H  | -4.108396 | -4.785599 | 0.980513  | H | 3.189393  | -3.035158 | 4.669344  |
| H  | -4.556746 | -4.615301 | -1.460023 | H | 4.559245  | -0.548709 | 2.136527  |
| H  | -3.606627 | -2.714120 | -2.762356 | H | 4.963683  | -1.449817 | 3.608085  |
| H  | -2.303853 | -0.963775 | -1.615964 | H | 4.669312  | -2.316944 | 2.083595  |
| H  | -2.768623 | -3.054909 | 2.124473  | C | 0.478333  | 2.921879  | 3.301996  |
| C  | -2.057264 | 0.949624  | 1.504146  | C | 1.452727  | 4.072340  | 2.985986  |
| H  | -1.741141 | 0.983440  | 2.541688  | C | -0.713048 | 3.443312  | 4.120916  |
| H  | -1.719003 | 1.735031  | 0.842593  | H | 0.073353  | 2.557178  | 2.355532  |
| C  | -3.201901 | 0.252840  | 1.143159  | H | 2.266354  | 3.750640  | 2.329275  |
| H  | -3.698232 | -0.346530 | 1.897753  | H | 0.926530  | 4.899123  | 2.492873  |
| C  | -3.962230 | 0.668818  | -0.083975 | H | 1.896650  | 4.458954  | 3.910353  |
| H  | -3.248045 | 0.932372  | -0.867870 | H | -1.358825 | 2.622196  | 4.437697  |
| H  | -4.581809 | -0.146112 | -0.459377 | H | -0.381526 | 3.985225  | 5.013767  |
| C  | -4.838736 | 1.920995  | 0.201375  | H | -1.296001 | 4.147407  | 3.515058  |
| H  | -4.354328 | 2.554325  | 0.952150  | S | -1.232442 | -1.080820 | 4.322362  |
| H  | -5.793526 | 1.603246  | 0.639676  | O | -0.294558 | -1.628684 | 5.297358  |
| Ni | -0.944222 | -0.778418 | 0.999361  | O | -1.629484 | 0.335824  | 4.445407  |
| O  | 0.238315  | -2.151842 | 0.198453  | O | -0.922743 | -1.495343 | 2.900564  |
| C  | 0.940936  | -0.797568 | -2.544197 | C | -2.819794 | -1.986999 | 4.659513  |
| C  | 2.225198  | -0.302712 | -3.241299 | F | -3.805898 | -1.536754 | 3.846938  |
| C  | 0.354213  | -1.981193 | -3.321156 | F | -2.683564 | -3.301786 | 4.449752  |
| H  | 1.206801  | -1.155906 | -1.547869 | F | -3.201547 | -1.785927 | 5.921760  |
| H  | 2.714877  | 0.497964  | -2.679078 | C | -5.061711 | 2.739643  | -1.053694 |
| H  | 2.938786  | -1.127881 | -3.338588 | C | -4.905961 | 4.130338  | -1.025515 |
| H  | 2.001253  | 0.077862  | -4.245095 | C | -5.373850 | 2.129476  | -2.276040 |
| H  | -0.568792 | -2.346696 | -2.864868 | C | -5.039509 | 4.893243  | -2.187013 |

|   |           |           |           |
|---|-----------|-----------|-----------|
| H | -4.666625 | 4.619246  | -0.084978 |
| C | -5.508245 | 2.886775  | -3.439599 |
| H | -5.499793 | 1.051447  | -2.324473 |
| C | -5.333908 | 4.272035  | -3.401493 |
| H | -4.909543 | 5.971018  | -2.142322 |
| H | -5.749303 | 2.394135  | -4.377645 |
| H | -5.433341 | 4.861308  | -4.308384 |
| S | 0.664058  | -3.549263 | 0.689207  |
| O | 2.125723  | -3.644713 | 0.745776  |
| O | -0.146756 | -4.066807 | 1.787387  |
| C | 0.238579  | -4.639425 | -0.765409 |
| F | 1.164468  | -4.522948 | -1.728713 |
| F | 0.215375  | -5.910040 | -0.353167 |
| F | -0.957446 | -4.336245 | -1.285797 |

**<sup>2</sup>TS13**

|    |           |           |           |
|----|-----------|-----------|-----------|
| Ni | -1.032247 | -0.481203 | 0.341643  |
| N  | 1.196482  | 1.149172  | 1.525502  |
| N  | -0.448936 | 0.990756  | 2.913355  |
| C  | 3.069056  | 0.475625  | 0.070573  |
| C  | 3.845741  | 0.745493  | -1.061893 |
| C  | 3.539212  | 1.801360  | -1.912512 |
| C  | 2.459207  | 2.632437  | -1.636166 |
| C  | 1.661860  | 2.423616  | -0.507307 |
| C  | 1.966567  | 1.314529  | 0.310924  |
| C  | 1.612395  | 1.743958  | 2.711930  |
| C  | 0.580797  | 1.644648  | 3.580825  |
| C  | -0.075067 | 0.658135  | 1.650270  |
| C  | -1.739546 | 0.860059  | 3.561465  |
| C  | -1.872842 | -0.101289 | 4.570115  |
| C  | -3.051200 | -0.081439 | 5.323883  |
| C  | -4.054813 | 0.838593  | 5.053468  |
| C  | -3.908395 | 1.755423  | 4.014377  |
| C  | -2.742969 | 1.796694  | 3.247004  |
| H  | 4.702540  | 0.116874  | -1.278042 |
| H  | 4.147288  | 1.981867  | -2.793805 |
| H  | 2.238627  | 3.460969  | -2.299137 |
| H  | 2.586561  | 2.192431  | 2.803774  |
| H  | 0.460875  | 1.973140  | 4.599626  |
| H  | -3.190562 | -0.816632 | 6.109751  |
| H  | -4.972198 | 0.826942  | 5.634568  |
| H  | -4.718807 | 2.436891  | 3.785720  |
| C  | -1.734444 | -1.117319 | -1.572866 |

|   |           |           |           |
|---|-----------|-----------|-----------|
| H | -2.739098 | -1.377817 | -1.285733 |
| H | -1.095834 | -1.932882 | -1.891480 |
| C | -2.585070 | 1.223013  | -1.922324 |
| H | -2.198866 | 2.237882  | -2.036573 |
| H | -3.048298 | 1.167452  | -0.938477 |
| C | -0.286098 | 0.445609  | -2.889490 |
| C | -0.362690 | 1.445027  | -3.871013 |
| C | 0.853875  | -0.373495 | -2.848347 |
| C | 0.660729  | 1.603851  | -4.805916 |
| H | -1.232998 | 2.087300  | -3.932108 |
| C | 1.872047  | -0.210107 | -3.780900 |
| H | 0.957216  | -1.120769 | -2.070960 |
| C | 1.778751  | 0.773176  | -4.768432 |
| H | 0.574659  | 2.373802  | -5.567096 |
| H | 2.748617  | -0.848063 | -3.726471 |
| H | 2.574532  | 0.893911  | -5.497878 |
| C | -3.692104 | 0.968303  | -2.970536 |
| H | -4.074798 | -0.048188 | -2.834679 |
| H | -3.289916 | 1.029889  | -3.987905 |
| C | -1.447309 | 0.207786  | -1.969815 |
| H | -0.772195 | 0.701723  | -0.584171 |
| O | -1.180327 | -2.336754 | 1.252531  |
| C | 0.603304  | 3.450261  | -0.125470 |
| C | -0.097882 | 4.091852  | -1.331161 |
| C | 1.240488  | 4.555532  | 0.741663  |
| H | -0.162890 | 2.953297  | 0.473176  |
| H | -0.402789 | 3.344552  | -2.065091 |
| H | -0.987162 | 4.636313  | -0.996285 |
| H | 0.552591  | 4.811761  | -1.840742 |
| H | 1.666906  | 4.155360  | 1.664919  |
| H | 2.040887  | 5.056795  | 0.185401  |
| H | 0.490932  | 5.305217  | 1.015443  |
| C | 3.483018  | -0.626404 | 1.031848  |
| C | 4.583041  | -0.119675 | 1.985861  |
| C | 3.967354  | -1.894103 | 0.311966  |
| H | 2.610659  | -0.896078 | 1.627890  |
| H | 4.256753  | 0.745061  | 2.571712  |
| H | 4.869449  | -0.911092 | 2.687670  |
| H | 5.476791  | 0.176323  | 1.424292  |
| H | 3.229978  | -2.238210 | -0.415824 |
| H | 4.921217  | -1.728229 | -0.201466 |
| H | 4.126243  | -2.693485 | 1.041105  |
| C | -0.808253 | -1.150640 | 4.838514  |
| C | -1.394802 | -2.569089 | 4.746867  |

|   |           |           |           |
|---|-----------|-----------|-----------|
| C | -0.119646 | -0.917936 | 6.194225  |
| H | -0.047088 | -1.068971 | 4.059441  |
| H | -1.898050 | -2.714263 | 3.788943  |
| H | -0.595626 | -3.310469 | 4.848622  |
| H | -2.122643 | -2.750283 | 5.545627  |
| H | 0.349162  | 0.071845  | 6.246948  |
| H | -0.839611 | -0.987932 | 7.017740  |
| H | 0.658563  | -1.671243 | 6.362856  |
| C | -2.567981 | 2.830501  | 2.142756  |
| C | -1.847990 | 4.081611  | 2.679890  |
| C | -3.883028 | 3.225420  | 1.456271  |
| H | -1.940313 | 2.377572  | 1.371262  |
| H | -0.858492 | 3.847196  | 3.084539  |
| H | -1.720151 | 4.821848  | 1.881314  |
| H | -2.438682 | 4.546119  | 3.477944  |
| H | -4.457853 | 2.345185  | 1.165351  |
| H | -4.508845 | 3.846961  | 2.107790  |
| H | -3.666408 | 3.815167  | 0.558239  |
| S | -4.168957 | -0.728025 | 1.472607  |
| O | -3.810622 | -1.508385 | 2.654536  |
| O | -5.321493 | 0.181714  | 1.531078  |
| O | -2.995978 | -0.046494 | 0.777848  |
| C | -4.730175 | -2.011730 | 0.245156  |
| F | -3.799022 | -2.953580 | 0.040893  |
| F | -5.843994 | -2.596051 | 0.683949  |
| F | -4.996651 | -1.434091 | -0.952296 |
| C | -4.798473 | 1.978443  | -2.773223 |
| C | -5.648298 | 1.878086  | -1.661831 |
| C | -4.945054 | 3.066314  | -3.639910 |
| C | -6.620046 | 2.848892  | -1.426173 |
| H | -5.548405 | 1.044914  | -0.973033 |
| C | -5.921217 | 4.037517  | -3.407785 |
| H | -4.291332 | 3.151895  | -4.505602 |
| C | -6.759753 | 3.931990  | -2.297741 |
| H | -7.266406 | 2.756028  | -0.558172 |
| H | -6.025343 | 4.874198  | -4.093444 |
| H | -7.518585 | 4.687397  | -2.113375 |
| S | 0.022992  | -2.958687 | 0.588080  |
| O | -0.206263 | -4.121963 | -0.261722 |
| O | 0.811488  | -1.825075 | -0.009721 |
| C | 1.036809  | -3.581219 | 2.015922  |
| F | 1.388430  | -2.564455 | 2.821123  |
| F | 2.146983  | -4.167792 | 1.559379  |
| F | 0.328343  | -4.464793 | 2.715707  |

**<sup>2</sup>TS14**

|    |           |           |           |
|----|-----------|-----------|-----------|
| Ni | -1.158424 | -0.294231 | 0.770970  |
| N  | 1.235969  | 1.283681  | 1.629487  |
| N  | -0.302742 | 1.065608  | 3.131751  |
| C  | 2.629086  | 0.382754  | -0.189017 |
| C  | 3.131925  | 0.544399  | -1.483788 |
| C  | 2.844716  | 1.685125  | -2.229965 |
| C  | 2.055252  | 2.698251  | -1.695603 |
| C  | 1.520541  | 2.588063  | -0.408031 |
| C  | 1.821584  | 1.416907  | 0.312691  |
| C  | 1.683243  | 1.948351  | 2.766346  |
| C  | 0.713122  | 1.819102  | 3.708894  |
| C  | 0.022554  | 0.724856  | 1.860017  |
| C  | -1.605336 | 0.810439  | 3.704343  |
| C  | -1.722041 | -0.150722 | 4.720329  |
| C  | -2.995228 | -0.358980 | 5.260779  |
| C  | -4.099400 | 0.339553  | 4.784546  |
| C  | -3.955485 | 1.269396  | 3.758129  |
| C  | -2.704037 | 1.534429  | 3.193200  |
| H  | 3.748849  | -0.234408 | -1.916241 |
| H  | 3.240615  | 1.783877  | -3.236601 |
| H  | 1.841220  | 3.582121  | -2.286758 |
| H  | 2.633584  | 2.455013  | 2.784241  |
| H  | 0.643622  | 2.183504  | 4.720095  |
| H  | -3.124429 | -1.094618 | 6.047075  |
| H  | -5.081879 | 0.151578  | 5.207556  |
| H  | -4.827239 | 1.797488  | 3.389662  |
| H  | -0.818126 | 0.799210  | -0.227781 |
| O  | -1.596688 | -2.168983 | 1.991344  |
| C  | 0.705310  | 3.728736  | 0.187195  |
| C  | -0.344634 | 4.296452  | -0.780355 |
| C  | 1.644165  | 4.845383  | 0.682824  |
| H  | 0.165138  | 3.347712  | 1.057757  |
| H  | -0.998921 | 3.511000  | -1.163814 |
| H  | -0.956021 | 5.042743  | -0.259946 |
| H  | 0.122825  | 4.800873  | -1.633284 |
| H  | 2.370878  | 4.471829  | 1.412124  |
| H  | 2.205327  | 5.276716  | -0.153793 |
| H  | 1.067400  | 5.648206  | 1.155891  |
| C  | 2.984740  | -0.824638 | 0.661971  |
| C  | 4.177597  | -0.493023 | 1.580010  |
| C  | 3.272749  | -2.085918 | -0.160131 |



|   |           |           |           |
|---|-----------|-----------|-----------|
| H | 2.126448  | -1.046062 | 1.297339  |
| H | 3.966885  | 0.363033  | 2.229971  |
| H | 4.412535  | -1.351063 | 2.219775  |
| H | 5.068574  | -0.254049 | 0.987616  |
| H | 2.439166  | -2.315501 | -0.828571 |
| H | 4.190416  | -1.987306 | -0.751479 |
| H | 3.407693  | -2.936210 | 0.513181  |
| C | -0.529169 | -0.943405 | 5.227802  |
| C | -0.861446 | -2.433150 | 5.404274  |
| C | 0.003542  | -0.349441 | 6.545064  |
| H | 0.262382  | -0.876762 | 4.476529  |
| H | -1.341900 | -2.832738 | 4.509585  |
| H | 0.056781  | -3.000055 | 5.587574  |
| H | -1.526092 | -2.598575 | 6.259630  |
| H | 0.298875  | 0.699801  | 6.435238  |
| H | -0.763583 | -0.395419 | 7.326638  |
| H | 0.876610  | -0.912499 | 6.893530  |
| C | -2.555022 | 2.611559  | 2.123356  |
| C | -2.218590 | 3.964874  | 2.777640  |
| C | -3.774388 | 2.730266  | 1.198652  |
| H | -1.711311 | 2.348847  | 1.481282  |
| H | -1.299815 | 3.907239  | 3.371338  |
| H | -2.080591 | 4.735256  | 2.010733  |
| H | -3.030667 | 4.283967  | 3.440885  |
| H | -4.069729 | 1.758309  | 0.794045  |
| H | -4.638103 | 3.166051  | 1.713107  |
| H | -3.531229 | 3.382605  | 0.354344  |
| S | -2.720342 | 0.416947  | -1.662826 |
| O | -3.977382 | 1.044128  | -2.047779 |
| O | -1.511405 | 1.321508  | -1.566505 |
| O | -2.789066 | -0.469046 | -0.424850 |
| C | -2.258612 | -0.792217 | -2.998769 |
| F | -3.200252 | -1.727180 | -3.100297 |
| F | -2.145808 | -0.141953 | -4.159416 |
| F | -1.091587 | -1.361480 | -2.694933 |
| S | -0.726599 | -3.019077 | 1.103872  |
| O | -1.297105 | -4.239616 | 0.551432  |
| O | -0.017232 | -2.090536 | 0.143897  |
| C | 0.629712  | -3.601893 | 2.234733  |
| F | 1.204224  | -2.557018 | 2.866570  |
| F | 1.571062  | -4.241993 | 1.535765  |
| F | 0.134175  | -4.431174 | 3.156132  |

**<sup>2</sup>TS15**

|   |           |           |           |
|---|-----------|-----------|-----------|
| C | 0.955210  | 0.496747  | 0.750466  |
| C | 2.591082  | 1.850251  | -0.068545 |
| C | 2.652212  | 1.902252  | 1.283291  |
| N | 1.639988  | 1.078409  | 1.765288  |
| N | 1.544755  | 0.988629  | -0.379155 |
| H | 3.305984  | 2.433635  | 1.954334  |
| H | 3.180084  | 2.330178  | -0.831133 |
| C | 1.420752  | 0.937950  | 3.186846  |
| C | 0.695516  | 1.945464  | 3.841923  |
| C | 2.024228  | -0.140492 | 3.850274  |
| C | 0.640140  | 1.881424  | 5.238042  |
| C | 1.945872  | -0.151059 | 5.244329  |
| C | 1.272642  | 0.854876  | 5.931203  |
| H | 0.082808  | 2.634360  | 5.784809  |
| H | 2.392037  | -0.970455 | 5.797303  |
| H | 1.209371  | 0.817913  | 7.014571  |
| C | 1.113515  | 0.676174  | -1.718496 |
| C | 0.190219  | 1.539684  | -2.340360 |
| C | 1.642311  | -0.467213 | -2.346667 |
| C | -0.264081 | 1.181785  | -3.614433 |
| C | 1.146999  | -0.781681 | -3.617863 |
| C | 0.193612  | 0.022878  | -4.236958 |
| H | -0.984048 | 1.813615  | -4.122971 |
| H | 1.514739  | -1.663821 | -4.129565 |
| H | -0.181479 | -0.244793 | -5.220757 |
| C | -4.631653 | -3.063093 | -1.650496 |
| C | -4.170818 | -2.793448 | -2.940384 |
| C | -3.430590 | -1.632137 | -3.173300 |
| C | -3.159505 | -0.751233 | -2.127781 |
| C | -3.615457 | -1.008413 | -0.826405 |
| C | -4.354823 | -2.177535 | -0.606109 |
| H | -5.207623 | -3.963732 | -1.454618 |
| H | -4.384106 | -3.481023 | -3.754091 |
| H | -3.058122 | -1.412406 | -4.170587 |
| H | -2.574271 | 0.139985  | -2.329782 |
| H | -4.711177 | -2.394905 | 0.396382  |
| C | -1.901811 | 0.412440  | 0.398761  |
| H | -1.756086 | 1.110168  | 1.221389  |
| H | -1.562830 | 0.862995  | -0.535734 |
| C | -3.357185 | -0.036561 | 0.308359  |
| H | -3.614779 | -0.526884 | 1.248624  |
| C | -4.314532 | 1.178142  | 0.162317  |
| H | -4.161103 | 1.660509  | -0.812069 |

|    |           |           |           |                         |           |           |           |
|----|-----------|-----------|-----------|-------------------------|-----------|-----------|-----------|
| H  | -5.344916 | 0.800216  | 0.149872  | H                       | 4.762054  | -1.801405 | 2.504741  |
| C  | -4.179536 | 2.227339  | 1.279734  | C                       | 0.007112  | 3.072739  | 3.083397  |
| H  | -3.187533 | 2.687724  | 1.231555  | C                       | 0.853839  | 4.358582  | 3.110274  |
| H  | -4.238904 | 1.725501  | 2.251480  | C                       | -1.410613 | 3.348154  | 3.610127  |
| Ni | -0.472276 | -0.876871 | 0.735612  | H                       | -0.091978 | 2.759467  | 2.037550  |
| O  | 0.697283  | -2.472224 | 0.299124  | H                       | 1.842865  | 4.206688  | 2.665616  |
| C  | -0.402075 | -3.101335 | 0.077603  | H                       | 0.352321  | 5.160269  | 2.555380  |
| C  | -0.839297 | -3.338138 | -1.356560 | H                       | 0.998745  | 4.700587  | 4.141538  |
| H  | -1.911860 | -3.523523 | -1.427766 | H                       | -1.995268 | 2.427010  | 3.655436  |
| H  | -0.573240 | -2.490951 | -1.989961 | H                       | -1.386019 | 3.792375  | 4.611728  |
| H  | -0.308747 | -4.229482 | -1.720471 | H                       | -1.920683 | 4.061789  | 2.952512  |
| C  | -0.885272 | -4.099667 | 1.106781  | S                       | -1.655881 | -0.970553 | 3.791672  |
| H  | -1.957460 | -4.286510 | 1.019509  | O                       | -1.114049 | -1.045577 | 5.148209  |
| H  | -0.352113 | -5.041590 | 0.916148  | O                       | -2.487518 | 0.190384  | 3.432842  |
| H  | -0.645420 | -3.754462 | 2.110280  | O                       | -0.634982 | -1.342525 | 2.736175  |
| C  | 2.776129  | -1.265529 | -1.717190 | C                       | -2.836234 | -2.406617 | 3.717241  |
| C  | 4.127560  | -0.606064 | -2.061804 | F                       | -3.340716 | -2.563385 | 2.471751  |
| C  | 2.803904  | -2.740620 | -2.134091 | F                       | -2.216332 | -3.547763 | 4.052397  |
| H  | 2.642951  | -1.239901 | -0.633601 | F                       | -3.858301 | -2.210527 | 4.554645  |
| H  | 4.182182  | 0.428162  | -1.711203 | H                       | -1.567737 | -1.890220 | 0.364015  |
| H  | 4.948817  | -1.161797 | -1.595427 | C                       | -5.231784 | 3.302408  | 1.165616  |
| H  | 4.290105  | -0.603587 | -3.146066 | C                       | -5.008503 | 4.441168  | 0.381158  |
| H  | 1.842209  | -3.221619 | -1.953233 | C                       | -6.471772 | 3.166989  | 1.802551  |
| H  | 3.069285  | -2.863043 | -3.190914 | C                       | -5.993819 | 5.417564  | 0.233838  |
| H  | 3.561047  | -3.269209 | -1.545713 | H                       | -4.048331 | 4.561248  | -0.116456 |
| C  | -0.236196 | 2.854921  | -1.697681 | C                       | -7.461242 | 4.139936  | 1.659773  |
| C  | -1.681395 | 3.264153  | -2.017193 | H                       | -6.657096 | 2.290720  | 2.419464  |
| C  | 0.721676  | 3.984795  | -2.127147 | C                       | -7.225725 | 5.269456  | 0.873611  |
| H  | -0.157098 | 2.742140  | -0.611444 | H                       | -5.799141 | 6.295672  | -0.376510 |
| H  | -2.394279 | 2.468821  | -1.789410 | H                       | -8.415032 | 4.018701  | 2.166416  |
| H  | -1.954561 | 4.140020  | -1.419177 | H                       | -7.994181 | 6.029639  | 0.763846  |
| H  | -1.802510 | 3.540939  | -3.070293 |                         |           |           |           |
| H  | 1.758964  | 3.765642  | -1.860626 |                         |           |           |           |
| H  | 0.677622  | 4.131137  | -3.212442 | <b><sup>2</sup>TS1a</b> |           |           |           |
| H  | 0.440033  | 4.926843  | -1.643514 | C                       | -1.806616 | 2.054320  | 2.232773  |
| C  | 2.734675  | -1.248978 | 3.089665  | C                       | -2.848580 | 1.254610  | 1.895128  |
| C  | 2.385511  | -2.640944 | 3.635209  | H                       | -1.730362 | 2.877801  | 2.923532  |
| C  | 4.255373  | -1.012678 | 3.073480  | H                       | -3.874454 | 1.241596  | 2.224409  |
| H  | 2.381201  | -1.230389 | 2.056037  | C                       | -1.057091 | 0.566083  | 0.675229  |
| H  | 1.301392  | -2.764670 | 3.682514  | N                       | -2.377867 | 0.360113  | 0.934206  |
| H  | 2.797804  | -3.410328 | 2.972776  | N                       | -0.726644 | 1.621334  | 1.472213  |
| H  | 2.801335  | -2.806675 | 4.635800  | C                       | 0.551028  | 2.281500  | 1.367406  |
| H  | 4.505943  | -0.049197 | 2.614471  | C                       | 1.545341  | 2.010489  | 2.320921  |
| H  | 4.661358  | -1.014137 | 4.092057  | C                       | 0.750332  | 3.151282  | 0.273374  |

|   |           |           |           |    |           |           |           |
|---|-----------|-----------|-----------|----|-----------|-----------|-----------|
| C | 2.760292  | 2.694439  | 2.190423  | H  | 2.361342  | -0.605868 | 4.450908  |
| C | 1.985863  | 3.798163  | 0.186585  | C  | -0.338573 | 3.393117  | -0.765214 |
| C | 2.976718  | 3.581218  | 1.141999  | H  | -0.901719 | 2.461900  | -0.873516 |
| H | 3.552616  | 2.512807  | 2.907606  | C  | -1.314138 | 4.488642  | -0.294414 |
| H | 2.180007  | 4.474440  | -0.638453 | H  | -1.784505 | 4.228443  | 0.658095  |
| H | 3.929991  | 4.095363  | 1.056840  | H  | -0.787748 | 5.441544  | -0.164679 |
| C | -3.265325 | -0.438970 | 0.121257  | H  | -2.109617 | 4.636968  | -1.034073 |
| C | -4.012565 | 0.236468  | -0.861782 | C  | 0.210829  | 3.735083  | -2.156560 |
| C | -3.369752 | -1.823311 | 0.346447  | H  | 0.668817  | 4.730222  | -2.186427 |
| C | -4.887104 | -0.522583 | -1.647641 | H  | 0.960002  | 3.006640  | -2.481539 |
| C | -4.256737 | -2.533353 | -0.471700 | H  | -0.608008 | 3.732227  | -2.884144 |
| C | -5.005120 | -1.894860 | -1.458180 | Ni | 0.595166  | -0.493745 | 0.065060  |
| H | -5.481073 | -0.030825 | -2.411866 | O  | 0.454329  | -1.720042 | 1.473117  |
| H | -4.364599 | -3.602866 | -0.334847 | C  | 1.379510  | -2.693959 | 1.875109  |
| H | -5.687250 | -2.471286 | -2.077300 | H  | 2.402096  | -2.277922 | 1.894890  |
| C | -2.585582 | -2.506934 | 1.453968  | C  | 1.392514  | -3.904910 | 0.931116  |
| H | -1.568278 | -2.098970 | 1.466177  | H  | 0.400451  | -4.369820 | 0.902045  |
| C | -2.444297 | -4.018990 | 1.247369  | H  | 1.665205  | -3.610965 | -0.085115 |
| H | -3.399661 | -4.548661 | 1.351192  | H  | 2.118660  | -4.657063 | 1.263398  |
| H | -2.027801 | -4.251569 | 0.261278  | C  | 1.023557  | -3.137152 | 3.300346  |
| H | -1.762795 | -4.425636 | 2.000519  | H  | 1.758895  | -3.848004 | 3.697242  |
| C | -3.224447 | -2.223439 | 2.827441  | H  | 0.977366  | -2.271569 | 3.967796  |
| H | -3.266446 | -1.151756 | 3.043395  | H  | 0.037929  | -3.618529 | 3.308373  |
| H | -4.245352 | -2.622742 | 2.879011  | C  | 0.562180  | -1.196106 | -1.804275 |
| H | -2.631042 | -2.696303 | 3.618074  | C  | 0.470384  | -0.018270 | -2.582358 |
| C | -3.947963 | 1.747522  | -1.050743 | C  | -0.386148 | -2.234585 | -1.942892 |
| H | -3.104740 | 2.132523  | -0.474576 | C  | -0.684688 | 0.193110  | -3.333548 |
| C | -3.712792 | 2.161444  | -2.510670 | H  | 1.274608  | 0.706349  | -2.573622 |
| H | -3.633863 | 3.252602  | -2.580634 | C  | -1.526443 | -1.987855 | -2.691504 |
| H | -2.789556 | 1.722732  | -2.892921 | H  | -0.249292 | -3.160629 | -1.398484 |
| H | -4.536013 | 1.849940  | -3.163155 | C  | -1.689039 | -0.776541 | -3.383832 |
| C | -5.223956 | 2.411039  | -0.500378 | H  | -0.781914 | 1.114536  | -3.901488 |
| H | -6.107386 | 2.082206  | -1.059511 | H  | -2.308773 | -2.738780 | -2.730249 |
| H | -5.386119 | 2.158680  | 0.552649  | H  | -2.585064 | -0.606806 | -3.970885 |
| H | -5.155913 | 3.501911  | -0.583370 | O  | 2.178187  | -1.865873 | -1.910379 |
| C | 1.326494  | 1.008174  | 3.443793  | S  | 3.277547  | -1.302190 | -0.975813 |
| H | 0.564220  | 0.296748  | 3.111714  | O  | 2.687451  | -0.277367 | -0.066153 |
| C | 0.826904  | 1.712534  | 4.718376  | O  | 4.148710  | -2.323491 | -0.416857 |
| H | 1.566148  | 2.438903  | 5.077220  | C  | 4.331863  | -0.294886 | -2.135236 |
| H | -0.112362 | 2.248603  | 4.546402  | F  | 3.613239  | 0.704357  | -2.663700 |
| H | 0.655011  | 0.980408  | 5.515558  | F  | 5.350827  | 0.220703  | -1.448363 |
| C | 2.592607  | 0.190190  | 3.737014  | F  | 4.794346  | -1.067701 | -3.114979 |
| H | 2.976502  | -0.271323 | 2.823557  |    |           |           |           |
| H | 3.386128  | 0.803198  | 4.180058  |    |           |           |           |

**<sup>2</sup>TS1c**

|    |           |           |           |
|----|-----------|-----------|-----------|
| Ni | 0.628533  | 0.110167  | 1.190795  |
| C  | 0.719564  | 0.689577  | -0.678245 |
| C  | 1.333653  | 0.769124  | -2.860011 |
| C  | 0.556350  | 1.852611  | -2.622455 |
| N  | 0.184192  | 1.790226  | -1.282467 |
| N  | 1.433287  | 0.073935  | -1.658680 |
| H  | 0.239032  | 2.653904  | -3.265877 |
| H  | 1.834673  | 0.427461  | -3.750909 |
| C  | -0.522850 | 2.829533  | -0.574873 |
| C  | 0.158728  | 3.520155  | 0.450761  |
| C  | -1.861398 | 3.118281  | -0.917902 |
| C  | -0.559476 | 4.477209  | 1.176591  |
| C  | -2.522097 | 4.095309  | -0.163637 |
| C  | -1.888694 | 4.757546  | 0.882849  |
| H  | -0.061501 | 5.017057  | 1.975355  |
| H  | -3.555390 | 4.327100  | -0.394505 |
| H  | -2.428968 | 5.501473  | 1.461361  |
| C  | 2.423086  | -0.968394 | -1.484736 |
| C  | 2.057085  | -2.315755 | -1.608871 |
| C  | 3.754192  | -0.559186 | -1.275545 |
| C  | 3.086431  | -3.266237 | -1.591504 |
| C  | 4.741206  | -1.548071 | -1.249564 |
| C  | 4.414976  | -2.889782 | -1.428035 |
| H  | 2.834511  | -4.316768 | -1.696097 |
| H  | 5.775270  | -1.263126 | -1.082718 |
| H  | 5.196170  | -3.644571 | -1.416128 |
| C  | -2.355300 | 0.983763  | 3.203021  |
| C  | -2.378173 | -0.053842 | 4.135682  |
| C  | -1.883086 | -1.320172 | 3.790621  |
| C  | -1.338372 | -1.548810 | 2.531055  |
| C  | -1.229379 | -0.463444 | 1.651565  |
| C  | -1.828660 | 0.776000  | 1.923953  |
| H  | -2.779674 | 1.953892  | 3.445379  |
| H  | -2.813032 | 0.107330  | 5.117249  |
| H  | -1.931307 | -2.137591 | 4.504843  |
| H  | -0.968542 | -2.525520 | 2.244193  |
| H  | -1.880745 | 1.550953  | 1.171233  |
| O  | -1.608699 | -1.052814 | -0.166789 |
| S  | -3.073452 | -1.129579 | -0.637127 |
| O  | -4.008989 | -0.464659 | 0.273421  |
| O  | -3.156243 | -0.874145 | -2.079063 |
| C  | -3.476502 | -2.939015 | -0.462601 |
| F  | -2.858356 | -3.656980 | -1.414436 |

|   |           |           |           |
|---|-----------|-----------|-----------|
| F | -4.793416 | -3.117949 | -0.585397 |
| F | -3.086752 | -3.400197 | 0.735733  |
| C | -2.593078 | 2.448250  | -2.072460 |
| C | -2.527187 | 3.336013  | -3.333068 |
| C | -4.067336 | 2.147526  | -1.753174 |
| H | -2.107964 | 1.491875  | -2.286798 |
| H | -1.504535 | 3.599789  | -3.621273 |
| H | -2.997634 | 2.823399  | -4.179037 |
| H | -3.065634 | 4.275816  | -3.163201 |
| H | -4.180346 | 1.625173  | -0.802053 |
| H | -4.667220 | 3.065134  | -1.728605 |
| H | -4.478045 | 1.498650  | -2.530976 |
| C | 1.640436  | 3.340644  | 0.758368  |
| C | 1.903578  | 3.053940  | 2.245662  |
| C | 2.433121  | 4.570150  | 0.279329  |
| H | 2.015112  | 2.484593  | 0.198287  |
| H | 1.353531  | 2.171642  | 2.592269  |
| H | 2.968329  | 2.861100  | 2.407964  |
| H | 1.613296  | 3.898693  | 2.879782  |
| H | 2.278624  | 4.745337  | -0.790965 |
| H | 2.126285  | 5.475158  | 0.815843  |
| H | 3.505242  | 4.421160  | 0.451656  |
| C | 0.612533  | -2.770041 | -1.683918 |
| C | 0.300438  | -3.636435 | -0.450036 |
| C | 0.295952  | -3.510569 | -2.992130 |
| H | -0.034017 | -1.893507 | -1.632851 |
| H | 0.516231  | -3.081345 | 0.467462  |
| H | -0.750250 | -3.926373 | -0.439765 |
| H | 0.906779  | -4.549645 | -0.440467 |
| H | 0.516403  | -2.884308 | -3.864021 |
| H | 0.876979  | -4.435876 | -3.086659 |
| H | -0.766668 | -3.770739 | -3.020963 |
| C | 4.134692  | 0.890862  | -1.021480 |
| C | 5.202325  | 1.396575  | -2.003996 |
| C | 4.579807  | 1.064748  | 0.442508  |
| H | 3.248648  | 1.512058  | -1.171911 |
| H | 5.415470  | 2.455504  | -1.818709 |
| H | 6.143147  | 0.845555  | -1.897301 |
| H | 4.867884  | 1.291373  | -3.042094 |
| H | 3.821833  | 0.680135  | 1.131939  |
| H | 5.510824  | 0.517747  | 0.632115  |
| H | 4.763682  | 2.123526  | 0.661679  |
| O | 1.925973  | -0.677428 | 2.140736  |
| C | 2.103297  | -1.911338 | 2.781849  |

|   |          |           |          |
|---|----------|-----------|----------|
| H | 1.244154 | -2.569962 | 2.560598 |
| C | 2.138937 | -1.690448 | 4.296276 |
| H | 1.207859 | -1.217383 | 4.625976 |
| H | 2.262406 | -2.638470 | 4.834373 |
| H | 2.973334 | -1.029154 | 4.558240 |
| C | 3.369793 | -2.590590 | 2.258296 |
| H | 4.245896 | -1.967482 | 2.473648 |
| H | 3.516718 | -3.572005 | 2.726280 |
| H | 3.305934 | -2.724925 | 1.175552 |

**<sup>2</sup>TS1b**

|    |           |           |           |
|----|-----------|-----------|-----------|
| C  | -1.906235 | 3.106729  | -0.486834 |
| C  | -2.911793 | 2.213680  | -0.309369 |
| H  | -1.917258 | 4.163088  | -0.697521 |
| H  | -3.983465 | 2.324243  | -0.339876 |
| C  | -0.954831 | 1.077717  | -0.092708 |
| N  | -2.311338 | 0.977610  | -0.077747 |
| N  | -0.720968 | 2.393444  | -0.353392 |
| C  | 0.599032  | 2.904529  | -0.626928 |
| C  | 1.311966  | 3.539231  | 0.403211  |
| C  | 1.117957  | 2.709190  | -1.923158 |
| C  | 2.588460  | 4.020715  | 0.089050  |
| C  | 2.400296  | 3.203338  | -2.178338 |
| C  | 3.125234  | 3.856416  | -1.184249 |
| H  | 3.175585  | 4.513790  | 0.855480  |
| H  | 2.841729  | 3.066138  | -3.158946 |
| H  | 4.122640  | 4.228250  | -1.401311 |
| C  | -3.047679 | -0.261298 | -0.088806 |
| C  | -3.506062 | -0.721093 | -1.335764 |
| C  | -3.301275 | -0.933249 | 1.120501  |
| C  | -4.272690 | -1.891679 | -1.352397 |
| C  | -4.064881 | -2.103006 | 1.043836  |
| C  | -4.552598 | -2.573149 | -0.173729 |
| H  | -4.646587 | -2.271494 | -2.298731 |
| H  | -4.280607 | -2.656554 | 1.950017  |
| H  | -5.147343 | -3.482182 | -0.201426 |
| Ni | 0.475487  | -0.078072 | 0.600242  |
| O  | 0.359224  | 0.487906  | 2.389193  |
| C  | 0.785445  | -0.177761 | 3.538327  |
| C  | 2.308072  | -0.372322 | 3.591406  |
| H  | 2.659496  | -0.944134 | 2.728595  |
| H  | 2.810912  | 0.601638  | 3.573137  |
| H  | 2.612980  | -0.899216 | 4.505377  |

|   |           |           |           |
|---|-----------|-----------|-----------|
| C | 0.454521  | -2.104538 | 0.248845  |
| C | -0.028183 | -2.345175 | -1.045985 |
| C | 0.119663  | -2.923121 | 1.335948  |
| C | -1.020629 | -3.312320 | -1.193062 |
| H | 0.329519  | -1.766739 | -1.887541 |
| C | -0.866704 | -3.884948 | 1.150405  |
| H | 0.592403  | -2.765552 | 2.297805  |
| C | -1.448060 | -4.079595 | -0.107492 |
| H | -1.458911 | -3.466973 | -2.173986 |
| H | -1.176256 | -4.493960 | 1.995223  |
| H | -2.216414 | -4.832988 | -0.243125 |
| O | 1.984762  | -1.500100 | 0.463645  |
| S | 3.124765  | -1.345303 | -0.655251 |
| O | 2.551990  | -1.015558 | -1.956992 |
| O | 4.212126  | -0.569386 | -0.084996 |
| C | 3.687247  | -3.122013 | -0.739917 |
| F | 2.686481  | -3.893759 | -1.163313 |
| F | 4.705618  | -3.200818 | -1.596431 |
| F | 4.080800  | -3.522642 | 0.466321  |
| C | 0.308352  | 2.014756  | -3.012183 |
| H | -0.331931 | 1.273697  | -2.523723 |
| C | 1.171742  | 1.253932  | -4.027590 |
| H | 0.523612  | 0.667034  | -4.688515 |
| H | 1.747589  | 1.935851  | -4.664046 |
| H | 1.864442  | 0.571842  | -3.529850 |
| C | -0.606591 | 3.019466  | -3.738948 |
| H | -1.212588 | 2.505862  | -4.495038 |
| H | -1.287635 | 3.525149  | -3.048539 |
| H | -0.007571 | 3.784815  | -4.246248 |
| C | 0.718728  | 3.706515  | 1.794092  |
| H | 0.032791  | 2.871957  | 1.964336  |
| C | 1.777607  | 3.621896  | 2.899820  |
| H | 1.284512  | 3.622693  | 3.877146  |
| H | 2.352104  | 2.696830  | 2.812159  |
| H | 2.468173  | 4.473555  | 2.881925  |
| C | -0.058446 | 5.032330  | 1.897797  |
| H | -0.498419 | 5.138190  | 2.896127  |
| H | 0.606571  | 5.887693  | 1.726915  |
| H | -0.870994 | 5.090104  | 1.166621  |
| C | -3.211489 | 0.010858  | -2.639533 |
| H | -2.587412 | 0.878893  | -2.418132 |
| C | -2.418713 | -0.863050 | -3.624526 |
| H | -2.974620 | -1.765141 | -3.904228 |
| H | -2.207531 | -0.302063 | -4.542284 |

|                         |           |           |           |    |           |           |           |
|-------------------------|-----------|-----------|-----------|----|-----------|-----------|-----------|
| H                       | -1.465543 | -1.172562 | -3.188382 | C  | -1.438226 | 2.107722  | -3.424267 |
| C                       | -4.505987 | 0.537190  | -3.282604 | H  | -1.770003 | 3.955004  | -2.387832 |
| H                       | -5.051217 | 1.192895  | -2.594834 | H  | -0.869295 | 0.237300  | -4.294586 |
| H                       | -4.278104 | 1.107536  | -4.190345 | H  | -2.143065 | 2.344102  | -4.216024 |
| H                       | -5.176328 | -0.284079 | -3.560175 | C  | -4.003582 | -3.512975 | 0.016693  |
| C                       | -2.802212 | -0.385361 | 2.449559  | C  | -3.961129 | -3.482098 | -1.378845 |
| H                       | -1.789772 | 0.009197  | 2.305339  | C  | -3.224310 | -2.487330 | -2.027278 |
| C                       | -3.694146 | 0.778352  | 2.924612  | C  | -2.537613 | -1.531165 | -1.280572 |
| H                       | -3.715147 | 1.597399  | 2.199562  | C  | -2.569958 | -1.569463 | 0.117212  |
| H                       | -4.725083 | 0.440838  | 3.089452  | C  | -3.316971 | -2.553932 | 0.765927  |
| H                       | -3.311102 | 1.181445  | 3.868979  | H  | -4.573892 | -4.283226 | 0.528767  |
| C                       | -2.709738 | -1.455604 | 3.544323  | H  | -4.503147 | -4.224570 | -1.957611 |
| H                       | -3.697751 | -1.814164 | 3.859575  | H  | -3.184624 | -2.453410 | -3.112961 |
| H                       | -2.120298 | -2.313923 | 3.209247  | H  | -1.987012 | -0.750831 | -1.793919 |
| H                       | -2.219064 | -1.033607 | 4.426124  | H  | -3.358912 | -2.581752 | 1.846884  |
| C                       | 0.296294  | 0.595102  | 4.771925  | C  | -1.957255 | 1.071314  | 1.334712  |
| H                       | 0.517696  | 0.055078  | 5.701291  | H  | -1.732609 | 1.173008  | 2.390900  |
| H                       | 0.782029  | 1.575866  | 4.818364  | H  | -1.611614 | 1.857963  | 0.678467  |
| H                       | -0.784769 | 0.758574  | 4.710344  | C  | -3.098852 | 0.352770  | 0.926909  |
| H                       | 0.320258  | -1.185215 | 3.589654  | H  | -3.653994 | -0.149976 | 1.710616  |
| <b><sup>2</sup>TS2a</b> |           |           |           | C  | -3.885115 | 0.862516  | -0.258203 |
| C                       | 0.701941  | 0.542910  | 0.922395  | H  | -3.195584 | 1.167122  | -1.051759 |
| C                       | 2.421321  | 1.649256  | -0.076489 | H  | -4.534530 | 0.086322  | -0.668459 |
| C                       | 2.785815  | 1.387934  | 1.198554  | C  | -4.746264 | 2.087038  | 0.139454  |
| N                       | 1.718877  | 0.721832  | 1.800691  | H  | -4.122779 | 2.825209  | 0.654984  |
| N                       | 1.136164  | 1.134133  | -0.234079 | H  | -5.519428 | 1.771777  | 0.851054  |
| H                       | 3.684117  | 1.610882  | 1.749113  | Ni | -0.910174 | -0.657319 | 0.930061  |
| H                       | 2.933006  | 2.153597  | -0.878205 | O  | 0.266818  | -1.964879 | 0.315060  |
| C                       | 1.721409  | 0.511062  | 3.235272  | C  | 0.343180  | -3.372119 | 0.450244  |
| C                       | 1.293764  | 1.579797  | 4.046222  | C  | -0.292980 | -3.937978 | 1.723282  |
| C                       | 2.263904  | -0.677079 | 3.749300  | H  | 0.002499  | -4.988252 | 1.840890  |
| C                       | 1.459972  | 1.440470  | 5.426530  | H  | 0.017786  | -3.381781 | 2.604859  |
| C                       | 2.415068  | -0.756850 | 5.136703  | H  | -1.382153 | -3.894482 | 1.672567  |
| C                       | 2.026827  | 0.290743  | 5.964725  | C  | -0.193086 | -4.105882 | -0.783353 |
| H                       | 1.126667  | 2.234016  | 6.085946  | H  | 0.024565  | -5.179077 | -0.707205 |
| H                       | 2.813672  | -1.662479 | 5.577592  | H  | -1.274272 | -3.984184 | -0.875329 |
| H                       | 2.140338  | 0.197537  | 7.040809  | H  | 0.275342  | -3.728479 | -1.695349 |
| C                       | 0.293738  | 1.461500  | -1.363049 | C  | 1.007264  | -0.708908 | -2.522570 |
| C                       | -0.355357 | 2.716116  | -1.340776 | C  | 2.461304  | -0.368643 | -2.909245 |
| C                       | 0.169797  | 0.560937  | -2.438998 | C  | 0.456372  | -1.736957 | -3.518726 |
| C                       | -1.235758 | 3.011798  | -2.386205 | H  | 1.003702  | -1.174555 | -1.530004 |
| C                       | -0.724556 | 0.913027  | -3.460492 | H  | 2.947341  | 0.272462  | -2.170736 |
|                         |           |           |           | H  | 3.050725  | -1.289317 | -2.983073 |
|                         |           |           |           | H  | 2.499147  | 0.137676  | -3.881723 |

|   |           |           |           |
|---|-----------|-----------|-----------|
| H | -0.575193 | -2.017918 | -3.289991 |
| H | 0.501722  | -1.373622 | -4.552747 |
| H | 1.063633  | -2.645845 | -3.471809 |
| C | -0.051118 | 3.767816  | -0.279523 |
| C | -1.279312 | 4.554849  | 0.203086  |
| C | 1.012096  | 4.749983  | -0.810977 |
| H | 0.374413  | 3.264922  | 0.590846  |
| H | -2.078767 | 3.897862  | 0.555324  |
| H | -0.992579 | 5.207171  | 1.034850  |
| H | -1.688265 | 5.195244  | -0.586172 |
| H | 1.921614  | 4.230913  | -1.125866 |
| H | 0.626595  | 5.303081  | -1.675075 |
| H | 1.284773  | 5.472851  | -0.033975 |
| C | 2.659802  | -1.830947 | 2.839633  |
| C | 2.558579  | -3.189702 | 3.549264  |
| C | 4.081232  | -1.649509 | 2.272866  |
| H | 1.958717  | -1.835660 | 1.998820  |
| H | 1.611966  | -3.289331 | 4.086421  |
| H | 2.626503  | -3.996920 | 2.812766  |
| H | 3.376712  | -3.331101 | 4.266236  |
| H | 4.169661  | -0.749870 | 1.657279  |
| H | 4.816491  | -1.582200 | 3.084109  |
| H | 4.347258  | -2.507529 | 1.644441  |
| C | 0.694653  | 2.853968  | 3.464505  |
| C | 1.772556  | 3.932687  | 3.243803  |
| C | -0.451799 | 3.427584  | 4.311835  |
| H | 0.269820  | 2.598347  | 2.489895  |
| H | 2.565813  | 3.593517  | 2.572195  |
| H | 1.325962  | 4.835504  | 2.808800  |
| H | 2.232714  | 4.211144  | 4.198894  |
| H | -1.182888 | 2.655259  | 4.554287  |
| H | -0.081422 | 3.862848  | 5.247183  |
| H | -0.948510 | 4.232822  | 3.757070  |
| S | -1.489481 | -0.958875 | 4.269851  |
| O | -0.601932 | -1.664331 | 5.195310  |
| O | -1.695508 | 0.488735  | 4.457715  |
| O | -1.295256 | -1.357629 | 2.831216  |
| C | -3.169116 | -1.683257 | 4.594325  |
| F | -4.102246 | -1.079307 | 3.822503  |
| F | -3.189791 | -2.993964 | 4.304084  |
| F | -3.517838 | -1.519355 | 5.872137  |
| H | 1.425433  | -3.592793 | 0.510520  |
| C | -5.368379 | 2.707167  | -1.089143 |
| C | -4.804851 | 3.847280  | -1.674401 |

|   |           |          |           |
|---|-----------|----------|-----------|
| C | -6.475600 | 2.114771 | -1.709158 |
| C | -5.328727 | 4.381574 | -2.852195 |
| H | -3.952355 | 4.321493 | -1.196248 |
| C | -7.003126 | 2.644738 | -2.886518 |
| H | -6.927048 | 1.231055 | -1.264021 |
| C | -6.429088 | 3.779260 | -3.464001 |
| H | -4.881884 | 5.271243 | -3.288142 |
| H | -7.864677 | 2.173912 | -3.351858 |
| H | -6.840651 | 4.193782 | -4.379844 |

**<sup>2</sup>TS2b**

|   |           |           |           |
|---|-----------|-----------|-----------|
| C | 0.707170  | 0.452770  | 0.857731  |
| C | 2.348240  | 1.695010  | -0.117846 |
| C | 2.760007  | 1.378157  | 1.129158  |
| N | 1.742817  | 0.624735  | 1.714599  |
| N | 1.084128  | 1.129736  | -0.271900 |
| H | 3.660012  | 1.613397  | 1.671809  |
| H | 2.812887  | 2.265569  | -0.903734 |
| C | 1.822983  | 0.316255  | 3.127101  |
| C | 1.341892  | 1.282335  | 4.029958  |
| C | 2.517385  | -0.835113 | 3.526211  |
| C | 1.622659  | 1.084718  | 5.384623  |
| C | 2.790988  | -0.969612 | 4.890170  |
| C | 2.358962  | -0.017163 | 5.806923  |
| H | 1.259471  | 1.800104  | 6.114486  |
| H | 3.321304  | -1.846645 | 5.243193  |
| H | 2.571608  | -0.150516 | 6.863725  |
| C | 0.228187  | 1.463896  | -1.387227 |
| C | -0.476314 | 2.686281  | -1.319358 |
| C | 0.172077  | 0.613970  | -2.509163 |
| C | -1.324230 | 3.007260  | -2.384482 |
| C | -0.688687 | 0.991540  | -3.549215 |
| C | -1.439658 | 2.161512  | -3.483269 |
| H | -1.889001 | 3.933080  | -2.357076 |
| H | -0.773638 | 0.358142  | -4.423781 |
| H | -2.104495 | 2.423878  | -4.301451 |
| C | -3.877117 | -3.648961 | -0.281016 |
| C | -3.899392 | -3.467845 | -1.665597 |
| C | -3.258161 | -2.362434 | -2.231506 |
| C | -2.599997 | -1.445621 | -1.412003 |
| C | -2.558740 | -1.640930 | -0.026376 |
| C | -3.215369 | -2.733422 | 0.541061  |
| H | -4.373644 | -4.506208 | 0.165352  |

|    |           |           |           |   |           |           |           |
|----|-----------|-----------|-----------|---|-----------|-----------|-----------|
| H  | -4.420619 | -4.179287 | -2.299760 | H | 0.379171  | 5.335940  | -1.457278 |
| H  | -3.278050 | -2.207179 | -3.307110 | H | 0.942065  | 5.448631  | 0.223286  |
| H  | -2.121256 | -0.578409 | -1.857393 | C | 2.933361  | -1.899928 | 2.521372  |
| H  | -3.210517 | -2.872926 | 1.613880  | C | 2.905521  | -3.308494 | 3.135634  |
| C  | -1.970175 | 0.908689  | 1.332435  | C | 4.326707  | -1.618566 | 1.927661  |
| H  | -1.794126 | 0.966111  | 2.401122  | H | 2.203634  | -1.877995 | 1.704901  |
| H  | -1.568789 | 1.706342  | 0.728687  | H | 1.981489  | -3.478954 | 3.693617  |
| C  | -3.130029 | 0.258769  | 0.867043  | H | 2.975992  | -4.060107 | 2.342378  |
| H  | -3.476149 | 0.555803  | -0.118052 | H | 3.750970  | -3.469217 | 3.815630  |
| C  | -4.186309 | -0.211083 | 1.830746  | H | 4.357911  | -0.673153 | 1.378217  |
| H  | -4.955182 | -0.784758 | 1.306254  | H | 5.084406  | -1.577749 | 2.719767  |
| H  | -3.739140 | -0.858964 | 2.578136  | H | 4.607972  | -2.416661 | 1.230622  |
| C  | -4.835077 | 0.984990  | 2.571840  | C | 0.584857  | 2.520209  | 3.566259  |
| H  | -5.307971 | 1.663936  | 1.850860  | C | 1.531629  | 3.723593  | 3.397827  |
| H  | -4.046739 | 1.544467  | 3.085488  | C | -0.587762 | 2.886328  | 4.489535  |
| Ni | -0.892830 | -0.780744 | 0.835901  | H | 0.157916  | 2.296222  | 2.584987  |
| O  | 0.306278  | -2.028753 | 0.144402  | H | 2.331142  | 3.517239  | 2.680002  |
| C  | 0.411641  | -3.437880 | 0.200383  | H | 0.976299  | 4.600507  | 3.042477  |
| C  | -0.120375 | -4.071580 | 1.489689  | H | 1.995098  | 3.983065  | 4.356613  |
| H  | 0.195996  | -5.121266 | 1.537290  | H | -1.224956 | 2.019954  | 4.680853  |
| H  | 0.254279  | -3.550250 | 2.368869  | H | -0.235394 | 3.275658  | 5.451608  |
| H  | -1.210420 | -4.042153 | 1.526952  | H | -1.189220 | 3.676143  | 4.023226  |
| C  | -0.198918 | -4.120664 | -1.028030 | S | -1.367954 | -1.363073 | 4.170993  |
| H  | 0.011077  | -5.197870 | -1.005167 | O | -0.150237 | -1.703931 | 4.906579  |
| H  | -1.281560 | -3.986170 | -1.056713 | O | -2.043006 | -0.088747 | 4.500061  |
| H  | 0.222887  | -3.712407 | -1.948816 | O | -1.301491 | -1.621598 | 2.690551  |
| C  | 1.044146  | -0.629187 | -2.620858 | C | -2.568370 | -2.687868 | 4.690531  |
| C  | 2.487860  | -0.243358 | -3.002023 | F | -3.710429 | -2.637763 | 3.972936  |
| C  | 0.511161  | -1.649277 | -3.634814 | F | -2.025377 | -3.897277 | 4.514114  |
| H  | 1.053389  | -1.117279 | -1.639657 | F | -2.885593 | -2.532718 | 5.980874  |
| H  | 2.957154  | 0.396561  | -2.251185 | H | 1.498785  | -3.640902 | 0.174415  |
| H  | 3.101546  | -1.146393 | -3.094490 | C | -5.851735 | 0.489179  | 3.573550  |
| H  | 2.511181  | 0.283005  | -3.964282 | C | -7.218373 | 0.484476  | 3.275543  |
| H  | -0.518657 | -1.942635 | -3.411989 | C | -5.424457 | -0.032186 | 4.803187  |
| H  | 0.555767  | -1.271357 | -4.663635 | C | -8.145604 | -0.027049 | 4.185413  |
| H  | 1.129576  | -2.551132 | -3.598900 | H | -7.559003 | 0.886283  | 2.323496  |
| C  | -0.271688 | 3.685817  | -0.185278 | C | -6.348702 | -0.546557 | 5.710942  |
| C  | -1.566646 | 4.370937  | 0.283021  | H | -4.364448 | -0.036528 | 5.039193  |
| C  | 0.754232  | 4.757110  | -0.605617 | C | -7.712106 | -0.545679 | 5.406045  |
| H  | 0.147417  | 3.153221  | 0.671809  | H | -9.204449 | -0.019539 | 3.940507  |
| H  | -2.352811 | 3.650949  | 0.527426  | H | -6.001475 | -0.950250 | 6.658193  |
| H  | -1.362416 | 4.963960  | 1.180981  | H | -8.431391 | -0.945833 | 6.115409  |
| H  | -1.959848 | 5.055434  | -0.476397 |   |           |           |           |
| H  | 1.709153  | 4.311748  | -0.897602 |   |           |           |           |



**<sup>2</sup>TS2c**

|   |           |           |           |    |           |           |           |
|---|-----------|-----------|-----------|----|-----------|-----------|-----------|
| C | 0.778365  | 0.318039  | 0.950514  | H  | -0.737937 | 2.019121  | 2.374555  |
| C | 2.149997  | 1.915969  | 0.065388  | C  | -2.765728 | 2.420290  | 2.995983  |
| C | 2.651337  | 1.569946  | 1.269782  | H  | -2.889699 | 3.228891  | 2.268210  |
| N | 1.812713  | 0.590078  | 1.796951  | H  | -2.408563 | 2.879168  | 3.925769  |
| N | 1.006669  | 1.143996  | -0.121308 | Ni | -0.780496 | -1.028280 | 0.972799  |
| H | 3.526608  | 1.899226  | 1.802939  | O  | 0.373064  | -2.312664 | 0.281449  |
| H | 2.495782  | 2.607386  | -0.683592 | C  | 0.490029  | -3.717201 | 0.416565  |
| C | 2.145870  | -0.011731 | 3.076421  | C  | 0.137146  | -4.226967 | 1.814843  |
| C | 1.921524  | 0.743774  | 4.241860  | H  | 0.438731  | -5.277482 | 1.915173  |
| C | 2.835633  | -1.243189 | 3.087275  | H  | 0.634331  | -3.644406 | 2.590868  |
| C | 2.322652  | 0.188068  | 5.461655  | H  | -0.936697 | -4.165340 | 1.995933  |
| C | 3.222646  | -1.739487 | 4.334408  | C  | -0.252833 | -4.517944 | -0.659825 |
| C | 2.955350  | -1.044837 | 5.509624  | H  | 0.064066  | -5.568085 | -0.613123 |
| H | 2.135891  | 0.735046  | 6.379483  | H  | -1.332891 | -4.488573 | -0.519518 |
| H | 3.730001  | -2.693929 | 4.392723  | H  | -0.022582 | -4.140240 | -1.658233 |
| H | 3.247878  | -1.468540 | 6.465741  | C  | 1.513975  | -0.857658 | -2.173767 |
| C | 0.241501  | 1.211536  | -1.344679 | C  | 2.912959  | -0.292596 | -2.489478 |
| C | -0.625454 | 2.306330  | -1.543246 | C  | 1.243823  | -2.088992 | -3.045857 |
| C | 0.453303  | 0.223272  | -2.328813 | H  | 1.490868  | -1.207256 | -1.139119 |
| C | -1.355931 | 2.348299  | -2.736281 | H  | 3.187373  | 0.529232  | -1.823124 |
| C | -0.309847 | 0.314489  | -3.500060 | H  | 3.666787  | -1.078931 | -2.370714 |
| C | -1.213463 | 1.354093  | -3.698250 | H  | 2.962662  | 0.073250  | -3.522494 |
| H | -2.039626 | 3.171108  | -2.914519 | H  | 0.220968  | -2.450785 | -2.913957 |
| H | -0.187288 | -0.435989 | -4.271640 | H  | 1.410907  | -1.887900 | -4.111421 |
| H | -1.794479 | 1.399674  | -4.615050 | H  | 1.923400  | -2.895728 | -2.754360 |
| C | -3.818430 | -4.002769 | 0.176600  | C  | -0.736579 | 3.460050  | -0.552720 |
| C | -3.874395 | -3.913907 | -1.215386 | C  | -2.176690 | 3.971554  | -0.375518 |
| C | -3.194092 | -2.884520 | -1.874647 | C  | 0.165067  | 4.630797  | -0.993188 |
| C | -2.469347 | -1.946050 | -1.142355 | H  | -0.380504 | 3.111628  | 0.421437  |
| C | -2.397028 | -2.056236 | 0.252150  | H  | -2.877261 | 3.162687  | -0.150229 |
| C | -3.083867 | -3.070934 | 0.916182  | H  | -2.214264 | 4.693380  | 0.446988  |
| H | -4.344299 | -4.800172 | 0.694663  | H  | -2.534036 | 4.486391  | -1.273743 |
| H | -4.448471 | -4.638927 | -1.785171 | H  | 1.213113  | 4.332305  | -1.080568 |
| H | -3.233169 | -2.808467 | -2.958199 | H  | -0.154623 | 5.013182  | -1.969118 |
| H | -1.958187 | -1.137843 | -1.659670 | H  | 0.106034  | 5.451268  | -0.269232 |
| H | -3.049351 | -3.134610 | 1.995892  | C  | 3.208786  | -1.981255 | 1.805730  |
| C | -3.029076 | -0.221658 | 1.170512  | C  | 3.582900  | -3.451599 | 2.044730  |
| H | -3.716534 | -0.203061 | 0.337047  | C  | 4.386016  | -1.296168 | 1.080595  |
| H | -3.394628 | -0.675042 | 2.082199  | H  | 2.334282  | -1.961328 | 1.147792  |
| C | -2.010081 | 0.737120  | 1.241391  | H  | 2.813724  | -3.984571 | 2.608213  |
| H | -1.845344 | 1.293197  | 0.325604  | H  | 3.710262  | -3.956484 | 1.081723  |
| C | -1.654027 | 1.444665  | 2.522238  | H  | 4.533019  | -3.543504 | 2.585333  |
| H | -1.462008 | 0.726392  | 3.316270  | H  | 4.155659  | -0.275425 | 0.769266  |
|   |           |           |           | H  | 5.271610  | -1.264214 | 1.727273  |

|                         |           |           |          |    |           |           |           |
|-------------------------|-----------|-----------|----------|----|-----------|-----------|-----------|
| H                       | 4.647424  | -1.862532 | 0.178831 | C  | 0.349068  | 0.652234  | 6.191253  |
| C                       | 1.377494  | 2.165657  | 4.226275 | C  | 1.675393  | -1.348361 | 5.971230  |
| C                       | 2.521134  | 3.174315  | 4.453074 | C  | 0.982417  | -0.443188 | 6.766587  |
| C                       | 0.264429  | 2.395079  | 5.261881 | H  | -0.214736 | 1.336186  | 6.815984  |
| H                       | 0.961134  | 2.364263  | 3.236200 | H  | 2.123435  | -2.223869 | 6.427005  |
| H                       | 3.312407  | 3.077357  | 3.702212 | H  | 0.909716  | -0.609171 | 7.837446  |
| H                       | 2.139431  | 4.201461  | 4.413634 | C  | 0.837543  | 1.630173  | -0.578681 |
| H                       | 2.979811  | 3.020902  | 5.436174 | C  | 0.421761  | 2.980418  | -0.509669 |
| H                       | -0.494775 | 1.613834  | 5.210941 | C  | 0.808257  | 0.895175  | -1.782650 |
| H                       | 0.667494  | 2.397577  | 6.280884 | C  | -0.160056 | 3.543016  | -1.650269 |
| H                       | -0.201936 | 3.373635  | 5.096367 | C  | 0.192580  | 1.505360  | -2.885236 |
| S                       | -0.948074 | -1.757769 | 4.407292 | C  | -0.307421 | 2.802134  | -2.816856 |
| O                       | 0.252986  | -2.528071 | 4.734545 | H  | -0.501536 | 4.572098  | -1.622045 |
| O                       | -1.207177 | -0.532061 | 5.188032 | H  | 0.123502  | 0.964482  | -3.820535 |
| O                       | -1.217871 | -1.589547 | 2.938323 | H  | -0.779997 | 3.246984  | -3.688146 |
| C                       | -2.365440 | -2.872620 | 4.852588 | C  | -2.928969 | -4.259003 | -0.856514 |
| F                       | -3.536306 | -2.325019 | 4.466341 | C  | -2.762596 | -3.844645 | -2.179312 |
| F                       | -2.249856 | -4.061109 | 4.237383 | C  | -2.230124 | -2.581055 | -2.447670 |
| F                       | -2.408938 | -3.076123 | 6.172115 | C  | -1.856039 | -1.742436 | -1.396637 |
| H                       | 1.563660  | -3.918275 | 0.259873 | C  | -1.988972 | -2.180833 | -0.074904 |
| C                       | -4.090521 | 1.737559  | 3.226831 | C  | -2.556138 | -3.423501 | 0.199582  |
| C                       | -5.176815 | 1.975400  | 2.376640 | H  | -3.352484 | -5.235846 | -0.639502 |
| C                       | -4.232542 | 0.792891  | 4.253948 | H  | -3.059783 | -4.495361 | -2.996510 |
| C                       | -6.381829 | 1.288992  | 2.542760 | H  | -2.113125 | -2.243852 | -3.474031 |
| H                       | -5.075863 | 2.704756  | 1.575597 | H  | -1.458126 | -0.754139 | -1.613300 |
| C                       | -5.433447 | 0.105070  | 4.420013 | H  | -2.703467 | -3.744100 | 1.221929  |
| H                       | -3.386545 | 0.566881  | 4.896649 | C  | -3.087485 | -0.699140 | 1.070505  |
| C                       | -6.512008 | 0.349670  | 3.565567 | H  | -3.667827 | -0.609258 | 0.160535  |
| H                       | -7.214413 | 1.486779  | 1.872874 | H  | -3.446545 | -1.417514 | 1.791593  |
| H                       | -5.519559 | -0.636156 | 5.208581 | C  | -2.322540 | 0.385404  | 1.491787  |
| H                       | -7.445476 | -0.190713 | 3.695663 | H  | -2.122587 | 0.466097  | 2.553523  |
|                         |           |           |          | C  | -2.280629 | 1.633911  | 0.655697  |
|                         |           |           |          | H  | -1.509586 | 2.296858  | 1.040207  |
|                         |           |           |          | H  | -2.010851 | 1.398247  | -0.379863 |
|                         |           |           |          | C  | -3.641351 | 2.380105  | 0.631071  |
|                         |           |           |          | H  | -4.397849 | 1.707915  | 0.206438  |
|                         |           |           |          | H  | -3.544757 | 3.220503  | -0.066508 |
|                         |           |           |          | Ni | -0.771792 | -1.106492 | 1.142621  |
|                         |           |           |          | O  | 0.736520  | -2.093340 | 0.656320  |
|                         |           |           |          | C  | 1.075881  | -3.465276 | 0.576751  |
|                         |           |           |          | C  | 0.288198  | -4.405925 | 1.497068  |
|                         |           |           |          | H  | 0.858294  | -5.330935 | 1.646523  |
|                         |           |           |          | H  | 0.101882  | -3.943677 | 2.463972  |
|                         |           |           |          | H  | -0.672885 | -4.677513 | 1.059190  |
| <b><sup>2</sup>TS2d</b> |           |           |          |    |           |           |           |
| C                       | 0.657968  | 0.321799  | 1.575195 |    |           |           |           |
| C                       | 2.596742  | 1.440921  | 1.142359 |    |           |           |           |
| C                       | 2.653810  | 1.007272  | 2.419209 |    |           |           |           |
| N                       | 1.461975  | 0.333377  | 2.672453 |    |           |           |           |
| N                       | 1.362766  | 1.039231  | 0.635949 |    |           |           |           |
| H                       | 3.401239  | 1.124431  | 3.185289 |    |           |           |           |
| H                       | 3.291945  | 2.008847  | 0.548993 |    |           |           |           |
| C                       | 1.160062  | -0.031489 | 4.043185 |    |           |           |           |
| C                       | 0.434284  | 0.892724  | 4.816475 |    |           |           |           |
| C                       | 1.763830  | -1.175756 | 4.587388 |    |           |           |           |

|   |           |           |           |                        |           |           |           |
|---|-----------|-----------|-----------|------------------------|-----------|-----------|-----------|
| C | 1.042158  | -3.973440 | -0.869064 | O                      | -1.154466 | -2.048965 | 2.963911  |
| H | 1.353142  | -5.025034 | -0.911697 | H                      | 2.128727  | -3.509516 | 0.910394  |
| H | 0.034584  | -3.895414 | -1.286490 | C                      | -4.105540 | 2.891942  | 1.976945  |
| H | 1.723707  | -3.395018 | -1.498965 | C                      | -4.622190 | 2.022838  | 2.948574  |
| C | 1.498251  | -0.455714 | -1.928101 | C                      | -4.022097 | 4.256119  | 2.284309  |
| C | 3.029835  | -0.289963 | -1.838014 | C                      | -5.026035 | 2.501219  | 4.193883  |
| C | 1.160877  | -1.173902 | -3.240662 | H                      | -4.698147 | 0.960522  | 2.741890  |
| H | 1.192586  | -1.093133 | -1.091715 | C                      | -4.429434 | 4.740670  | 3.528751  |
| H | 3.346108  | 0.089586  | -0.864764 | H                      | -3.645297 | 4.948273  | 1.535248  |
| H | 3.513437  | -1.262727 | -1.981032 | C                      | -4.930528 | 3.862225  | 4.489631  |
| H | 3.398604  | 0.390793  | -2.615404 | H                      | -5.407220 | 1.805057  | 4.934978  |
| H | 0.085529  | -1.313213 | -3.376035 | H                      | -4.357554 | 5.803365  | 3.743882  |
| H | 1.552783  | -0.634394 | -4.111725 | H                      | -5.244788 | 4.234242  | 5.460550  |
| H | 1.618178  | -2.166676 | -3.240859 | C                      | -3.167446 | -3.310476 | 4.069246  |
| C | 0.668973  | 3.865517  | 0.710212  | S                      | -1.918124 | -1.942728 | 4.261114  |
| C | -0.491935 | 4.807552  | 1.067176  | O                      | -2.737143 | -0.719535 | 4.362918  |
| C | 1.939042  | 4.711676  | 0.480550  | O                      | -1.143520 | -2.366103 | 5.426905  |
| H | 0.844070  | 3.225451  | 1.576952  | F                      | -4.093959 | -3.004415 | 3.129511  |
| H | -1.414649 | 4.269934  | 1.288365  | F                      | -3.807328 | -3.523165 | 5.220334  |
| H | -0.227695 | 5.385291  | 1.959061  | F                      | -2.567597 | -4.448969 | 3.687684  |
| H | -0.697814 | 5.526490  | 0.266864  |                        |           |           |           |
| H | 2.804874  | 4.097332  | 0.220080  |                        |           |           |           |
| H | 1.780760  | 5.421194  | -0.339690 | <b><sup>2</sup>TS3</b> |           |           |           |
| H | 2.183927  | 5.282322  | 1.383319  | C                      | 0.955210  | 0.496747  | 0.750466  |
| C | 2.459839  | -2.207463 | 3.713643  | C                      | 2.591082  | 1.850251  | -0.068545 |
| C | 2.199170  | -3.636564 | 4.217937  | C                      | 2.652212  | 1.902252  | 1.283291  |
| C | 3.977260  | -1.962320 | 3.617911  | N                      | 1.639988  | 1.078409  | 1.765288  |
| H | 2.032169  | -2.119421 | 2.710832  | N                      | 1.544755  | 0.988629  | -0.379155 |
| H | 1.139453  | -3.791483 | 4.433979  | H                      | 3.305984  | 2.433635  | 1.954334  |
| H | 2.514303  | -4.361732 | 3.460821  | H                      | 3.180084  | 2.330178  | -0.831133 |
| H | 2.768088  | -3.850062 | 5.130821  | C                      | 1.420752  | 0.937950  | 3.186846  |
| H | 4.212977  | -1.002109 | 3.150220  | C                      | 0.695516  | 1.945464  | 3.841923  |
| H | 4.436846  | -1.978003 | 4.613756  | C                      | 2.024228  | -0.140492 | 3.850274  |
| H | 4.448828  | -2.747846 | 3.015621  | C                      | 0.640140  | 1.881424  | 5.238042  |
| C | -0.179583 | 2.153231  | 4.224777  | C                      | 1.945872  | -0.151059 | 5.244329  |
| C | 0.780768  | 3.346091  | 4.393623  | C                      | 1.272642  | 0.854876  | 5.931203  |
| C | -1.557569 | 2.479993  | 4.816059  | H                      | 0.082808  | 2.634360  | 5.784809  |
| H | -0.323120 | 1.988908  | 3.152507  | H                      | 2.392037  | -0.970455 | 5.797303  |
| H | 1.742620  | 3.167572  | 3.901232  | H                      | 1.209371  | 0.817913  | 7.014571  |
| H | 0.341860  | 4.256483  | 3.969420  | C                      | 1.113515  | 0.676174  | -1.718496 |
| H | 0.975693  | 3.528954  | 5.456613  | C                      | 0.190219  | 1.539684  | -2.340360 |
| H | -2.210384 | 1.605138  | 4.798187  | C                      | 1.642311  | -0.467213 | -2.346667 |
| H | -1.478253 | 2.826937  | 5.852931  | C                      | -0.264081 | 1.181785  | -3.614433 |
| H | -2.031061 | 3.281101  | 4.240992  | C                      | 1.146999  | -0.781681 | -3.617863 |

|    |           |           |           |   |           |           |           |
|----|-----------|-----------|-----------|---|-----------|-----------|-----------|
| C  | 0.193612  | 0.022878  | -4.236958 | H | 1.842209  | -3.221619 | -1.953233 |
| H  | -0.984048 | 1.813615  | -4.122971 | H | 3.069285  | -2.863043 | -3.190914 |
| H  | 1.514739  | -1.663821 | -4.129565 | H | 3.561047  | -3.269209 | -1.545713 |
| H  | -0.181479 | -0.244793 | -5.220757 | C | -0.236196 | 2.854921  | -1.697681 |
| C  | -4.631653 | -3.063093 | -1.650496 | C | -1.681395 | 3.264153  | -2.017193 |
| C  | -4.170818 | -2.793448 | -2.940384 | C | 0.721676  | 3.984795  | -2.127147 |
| C  | -3.430590 | -1.632137 | -3.173300 | H | -0.157098 | 2.742140  | -0.611444 |
| C  | -3.159505 | -0.751233 | -2.127781 | H | -2.394279 | 2.468821  | -1.789410 |
| C  | -3.615457 | -1.008413 | -0.826405 | H | -1.954561 | 4.140020  | -1.419177 |
| C  | -4.354823 | -2.177535 | -0.606109 | H | -1.802510 | 3.540939  | -3.070293 |
| H  | -5.207623 | -3.963732 | -1.454618 | H | 1.758964  | 3.765642  | -1.860626 |
| H  | -4.384106 | -3.481023 | -3.754091 | H | 0.677622  | 4.131137  | -3.212442 |
| H  | -3.058122 | -1.412406 | -4.170587 | H | 0.440033  | 4.926843  | -1.643514 |
| H  | -2.574271 | 0.139985  | -2.329782 | C | 2.734675  | -1.248978 | 3.089665  |
| H  | -4.711177 | -2.394905 | 0.396382  | C | 2.385511  | -2.640944 | 3.635209  |
| C  | -1.901811 | 0.412440  | 0.398761  | C | 4.255373  | -1.012678 | 3.073480  |
| H  | -1.756086 | 1.110168  | 1.221389  | H | 2.381201  | -1.230389 | 2.056037  |
| H  | -1.562830 | 0.862995  | -0.535734 | H | 1.301392  | -2.764670 | 3.682514  |
| C  | -3.357185 | -0.036561 | 0.308359  | H | 2.797804  | -3.410328 | 2.972776  |
| H  | -3.614779 | -0.526884 | 1.248624  | H | 2.801335  | -2.806675 | 4.635800  |
| C  | -4.314532 | 1.178142  | 0.162317  | H | 4.505943  | -0.049197 | 2.614471  |
| H  | -4.161103 | 1.660509  | -0.812069 | H | 4.661358  | -1.014137 | 4.092057  |
| H  | -5.344916 | 0.800216  | 0.149872  | H | 4.762054  | -1.801405 | 2.504741  |
| C  | -4.179536 | 2.227339  | 1.279734  | C | 0.007112  | 3.072739  | 3.083397  |
| H  | -3.187533 | 2.687724  | 1.231555  | C | 0.853839  | 4.358582  | 3.110274  |
| H  | -4.238904 | 1.725501  | 2.251480  | C | -1.410613 | 3.348154  | 3.610127  |
| Ni | -0.472276 | -0.876871 | 0.735612  | H | -0.091978 | 2.759467  | 2.037550  |
| O  | 0.697283  | -2.472224 | 0.299124  | H | 1.842865  | 4.206688  | 2.665616  |
| C  | -0.402075 | -3.101335 | 0.077603  | H | 0.352321  | 5.160269  | 2.555380  |
| C  | -0.839297 | -3.338138 | -1.356560 | H | 0.998745  | 4.700587  | 4.141538  |
| H  | -1.911860 | -3.523523 | -1.427766 | H | -1.995268 | 2.427010  | 3.655436  |
| H  | -0.573240 | -2.490951 | -1.989961 | H | -1.386019 | 3.792375  | 4.611728  |
| H  | -0.308747 | -4.229482 | -1.720471 | H | -1.920683 | 4.061789  | 2.952512  |
| C  | -0.885272 | -4.099667 | 1.106781  | S | -1.655881 | -0.970553 | 3.791672  |
| H  | -1.957460 | -4.286510 | 1.019509  | O | -1.114049 | -1.045577 | 5.148209  |
| H  | -0.352113 | -5.041590 | 0.916148  | O | -2.487518 | 0.190384  | 3.432842  |
| H  | -0.645420 | -3.754462 | 2.110280  | O | -0.634982 | -1.342525 | 2.736175  |
| C  | 2.776129  | -1.265529 | -1.717190 | C | -2.836234 | -2.406617 | 3.717241  |
| C  | 4.127560  | -0.606064 | -2.061804 | F | -3.340716 | -2.563385 | 2.471751  |
| C  | 2.803904  | -2.740620 | -2.134091 | F | -2.216332 | -3.547763 | 4.052397  |
| H  | 2.642951  | -1.239901 | -0.633601 | F | -3.858301 | -2.210527 | 4.554645  |
| H  | 4.182182  | 0.428162  | -1.711203 | H | -1.567737 | -1.890220 | 0.364015  |
| H  | 4.948817  | -1.161797 | -1.595427 | C | -5.231784 | 3.302408  | 1.165616  |
| H  | 4.290105  | -0.603587 | -3.146066 | C | -5.008503 | 4.441168  | 0.381158  |

|   |           |          |           |   |            |           |          |
|---|-----------|----------|-----------|---|------------|-----------|----------|
| C | -6.471772 | 3.166989 | 1.802551  | H | -8.121712  | -0.552300 | 1.654567 |
| C | -5.993819 | 5.417564 | 0.233838  | C | -10.557809 | -2.018825 | 3.520420 |
| H | -4.048331 | 4.561248 | -0.116456 | H | -11.950925 | -3.485491 | 2.775438 |
| C | -7.461242 | 4.139936 | 1.659773  | H | -9.027256  | -0.562492 | 3.957561 |
| H | -6.657096 | 2.290720 | 2.419464  | H | -10.963509 | -2.021107 | 4.528465 |
| C | -7.225725 | 5.269456 | 0.873611  | C | -3.692533  | -7.227254 | 1.939261 |
| H | -5.799141 | 6.295672 | -0.376510 | H | -4.698790  | -7.634899 | 1.810145 |
| H | -8.415032 | 4.018701 | 2.166416  | C | -3.784671  | -6.144562 | 3.030064 |
| H | -7.994181 | 6.029639 | 0.763846  | H | -4.203688  | -6.568886 | 3.951422 |

**<sup>2</sup>TS4**

|    |            |           |           |   |            |           |           |
|----|------------|-----------|-----------|---|------------|-----------|-----------|
| C  | -5.824263  | -8.198855 | -0.362877 | H | -3.170422  | -8.850760 | 3.286180  |
| C  | -7.131799  | -8.310495 | -0.025126 | H | -2.738886  | -9.167652 | 1.592819  |
| H  | -5.089198  | -8.935976 | -0.643225 | H | -1.764221  | -8.057926 | 2.569193  |
| H  | -7.786163  | -9.163868 | 0.044822  | C | -4.840975  | -5.388692 | -2.678196 |
| C  | -6.574124  | -6.098301 | 0.113364  | H | -5.775642  | -5.133836 | -2.167400 |
| N  | -7.571880  | -7.019258 | 0.253934  | C | -4.473498  | -4.189235 | -3.559720 |
| N  | -5.502598  | -6.847490 | -0.269307 | H | -5.299045  | -3.965273 | -4.241521 |
| C  | -4.154232  | -6.363168 | -0.425054 | H | -4.276126  | -3.298609 | -2.955653 |
| C  | -3.804940  | -5.676470 | -1.599033 | H | -3.591641  | -4.389813 | -4.179219 |
| C  | -3.254288  | -6.603269 | 0.622071  | C | -5.108184  | -6.632017 | -3.547281 |
| C  | -2.476003  | -5.263937 | -1.723638 | H | -5.895974  | -6.421679 | -4.280317 |
| C  | -1.935165  | -6.170082 | 0.449339  | H | -4.202282  | -6.925013 | -4.091489 |
| C  | -1.547822  | -5.513926 | -0.713559 | H | -5.432081  | -7.485732 | -2.944467 |
| H  | -2.160079  | -4.728756 | -2.611630 | C | -7.986640  | -6.247566 | 3.051009  |
| H  | -1.212650  | -6.329084 | 1.243739  | H | -7.045860  | -6.487296 | 2.550411  |
| H  | -0.520613  | -5.179774 | -0.831006 | C | -7.871100  | -4.801382 | 3.563652  |
| C  | -8.905090  | -6.714680 | 0.692673  | H | -8.776101  | -4.487941 | 4.094845  |
| C  | -9.117501  | -6.376686 | 2.041467  | H | -7.018709  | -4.711329 | 4.246030  |
| C  | -9.950025  | -6.800133 | -0.244662 | H | -7.716129  | -4.097628 | 2.738761  |
| C  | -10.438015 | -6.153416 | 2.445963  | C | -8.154517  | -7.242832 | 4.211279  |
| C  | -11.252332 | -6.573083 | 0.213601  | H | -8.214320  | -8.273821 | 3.844804  |
| C  | -11.495980 | -6.262592 | 1.548749  | H | -7.300757  | -7.170881 | 4.894524  |
| H  | -10.635360 | -5.884152 | 3.478290  | H | -9.062698  | -7.038569 | 4.789915  |
| H  | -12.081448 | -6.639941 | -0.484124 | C | -9.700563  | -7.135377 | -1.707528 |
| H  | -12.513926 | -6.090665 | 1.887770  | H | -8.620223  | -7.132560 | -1.878568 |
| Ni | -6.652101  | -4.110098 | 0.414841  | C | -10.225364 | -8.542112 | -2.045847 |
| C  | -9.517434  | -2.005452 | 0.902268  | H | -9.768028  | -9.307605 | -1.409128 |
| C  | -10.592028 | -2.836499 | 1.241854  | H | -11.310962 | -8.599620 | -1.904926 |
| C  | -8.965793  | -1.192205 | 1.900158  | H | -10.006797 | -8.791683 | -3.090296 |
| C  | -11.113021 | -2.837219 | 2.535762  | C | -10.305095 | -6.083565 | -2.647990 |
| H  | -11.018692 | -3.501437 | 0.496874  | H | -11.396936 | -6.039074 | -2.562662 |
| C  | -9.474576  | -1.199307 | 3.199200  | H | -9.907444  | -5.087342 | -2.439504 |

|                         |            |           |           |    |            |           |           |
|-------------------------|------------|-----------|-----------|----|------------|-----------|-----------|
| H                       | -10.063447 | -6.321348 | -3.687447 | N  | -5.290324  | -7.088964 | 0.589247  |
| C                       | -10.447658 | -4.099807 | -5.489275 | C  | -3.952736  | -6.547412 | 0.641597  |
| C                       | -10.504177 | -3.071496 | -4.549986 | C  | -3.281743  | -6.256096 | -0.554199 |
| C                       | -9.337560  | -2.564257 | -3.959751 | C  | -3.335343  | -6.478395 | 1.902468  |
| C                       | -8.110562  | -3.121709 | -4.337074 | C  | -1.953770  | -5.828372 | -0.459175 |
| C                       | -8.047598  | -4.158234 | -5.270555 | C  | -2.013709  | -6.021689 | 1.945549  |
| C                       | -9.216067  | -4.649192 | -5.853339 | C  | -1.329540  | -5.697127 | 0.777582  |
| H                       | -11.364228 | -4.471252 | -5.939648 | H  | -1.406232  | -5.591281 | -1.366058 |
| H                       | -11.466246 | -2.644302 | -4.275953 | H  | -1.512632  | -5.932353 | 2.904064  |
| H                       | -7.194113  | -2.729884 | -3.904150 | H  | -0.301923  | -5.348750 | 0.831375  |
| H                       | -7.083680  | -4.571735 | -5.553920 | C  | -8.813806  | -7.259899 | 1.001251  |
| H                       | -9.168150  | -5.448378 | -6.587713 | C  | -9.271989  | -6.827015 | 2.265882  |
| C                       | -9.424385  | -1.420850 | -2.972646 | C  | -9.689910  | -7.572628 | -0.058416 |
| H                       | -8.432649  | -0.968334 | -2.849431 | C  | -10.651525 | -6.636311 | 2.408843  |
| H                       | -10.058373 | -0.643118 | -3.416182 | C  | -11.058684 | -7.357556 | 0.143913  |
| C                       | -9.998881  | -1.776281 | -1.575573 | C  | -11.534002 | -6.880269 | 1.359512  |
| H                       | -10.656030 | -2.650841 | -1.658709 | H  | -11.043878 | -6.288511 | 3.355874  |
| H                       | -10.630846 | -0.947412 | -1.235107 | H  | -11.757212 | -7.576486 | -0.656752 |
| C                       | -8.922139  | -2.016753 | -0.494149 | H  | -12.598525 | -6.713298 | 1.497892  |
| H                       | -8.226451  | -1.168178 | -0.554905 | Ni | -6.993394  | -4.424458 | 0.502500  |
| C                       | -8.115971  | -3.312818 | -0.712149 | C  | -8.467110  | -3.051486 | 0.254457  |
| H                       | -8.798237  | -4.168613 | -0.634606 | C  | -9.703483  | -3.578387 | 0.655531  |
| H                       | -7.649088  | -3.330433 | -1.700230 | C  | -8.296883  | -1.665416 | 0.202818  |
| O                       | -4.904250  | -3.804287 | 0.927278  | C  | -10.742873 | -2.731977 | 1.035395  |
| H                       | -7.079378  | -2.726972 | 0.458984  | H  | -9.862623  | -4.651642 | 0.664550  |
| C                       | -4.338639  | -2.532712 | 1.090658  | C  | -9.341969  | -0.815331 | 0.576148  |
| H                       | -5.008833  | -1.872378 | 1.673997  | H  | -7.353557  | -1.250049 | -0.136282 |
| C                       | -4.104371  | -1.872894 | -0.275600 | C  | -10.564653 | -1.345169 | 0.993580  |
| H                       | -3.681733  | -0.864198 | -0.176574 | H  | -11.690520 | -3.155055 | 1.359008  |
| H                       | -3.413283  | -2.487111 | -0.864905 | H  | -9.200076  | 0.261756  | 0.535956  |
| H                       | -5.051117  | -1.800358 | -0.824611 | H  | -11.377203 | -0.682028 | 1.277102  |
| C                       | -3.019992  | -2.662992 | 1.861915  | C  | -4.047719  | -6.899073 | 3.179968  |
| H                       | -2.337366  | -3.324781 | 1.316710  | H  | -4.949251  | -7.450533 | 2.901353  |
| H                       | -2.534841  | -1.687699 | 1.997384  | C  | -4.504585  | -5.672041 | 3.979481  |
| H                       | -3.199156  | -3.100264 | 2.849692  | H  | -5.014085  | -5.986051 | 4.899715  |
|                         |            |           |           | H  | -3.649075  | -5.047486 | 4.263952  |
|                         |            |           |           | H  | -5.197154  | -5.067002 | 3.389145  |
|                         |            |           |           | C  | -3.190625  | -7.850319 | 4.030314  |
|                         |            |           |           | H  | -3.775120  | -8.215526 | 4.882401  |
|                         |            |           |           | H  | -2.852612  | -8.716365 | 3.449569  |
|                         |            |           |           | H  | -2.303426  | -7.349528 | 4.433321  |
|                         |            |           |           | C  | -3.921294  | -6.463136 | -1.915773 |
|                         |            |           |           | H  | -4.976278  | -6.701502 | -1.754913 |
|                         |            |           |           | C  | -3.857866  | -5.193159 | -2.778012 |
| <b><sup>2</sup>TS5a</b> |            |           |           |    |            |           |           |
| C                       | -5.470712  | -8.470832 | 0.585270  |    |            |           |           |
| C                       | -6.796629  | -8.690820 | 0.724533  |    |            |           |           |
| H                       | -4.632716  | -9.144378 | 0.510216  |    |            |           |           |
| H                       | -7.367266  | -9.600758 | 0.799333  |    |            |           |           |
| C                       | -6.473399  | -6.425220 | 0.719397  |    |            |           |           |
| N                       | -7.396659  | -7.436351 | 0.804549  |    |            |           |           |

|   |            |            |           |
|---|------------|------------|-----------|
| H | -4.392629  | -5.350891  | -3.722957 |
| H | -4.314664  | -4.360359  | -2.235539 |
| H | -2.822676  | -4.930494  | -3.026070 |
| C | -3.286720  | -7.670142  | -2.629820 |
| H | -3.774167  | -7.843892  | -3.596355 |
| H | -2.219943  | -7.501228  | -2.816133 |
| H | -3.379541  | -8.583604  | -2.030573 |
| C | -8.323170  | -6.606556  | 3.440043  |
| H | -7.519753  | -5.947099  | 3.096274  |
| C | -8.986613  | -5.894158  | 4.623538  |
| H | -9.733693  | -6.528444  | 5.117798  |
| H | -8.221838  | -5.646088  | 5.366397  |
| H | -9.464317  | -4.961208  | 4.318035  |
| C | -7.723749  | -7.937301  | 3.938011  |
| H | -7.156658  | -8.464115  | 3.168209  |
| H | -7.042682  | -7.743169  | 4.774201  |
| H | -8.514819  | -8.607983  | 4.296279  |
| C | -9.223970  | -8.220609  | -1.357910 |
| H | -8.142155  | -8.082341  | -1.446962 |
| C | -9.501502  | -9.737076  | -1.317526 |
| H | -9.036668  | -10.217350 | -0.451281 |
| H | -10.579082 | -9.926922  | -1.257937 |
| H | -9.119369  | -10.221916 | -2.223023 |
| C | -9.878737  | -7.616513  | -2.611345 |
| H | -10.949968 | -7.839405  | -2.656654 |
| H | -9.765273  | -6.531742  | -2.648601 |
| H | -9.418682  | -8.039459  | -3.511445 |
| C | -12.623217 | -2.446158  | -5.071903 |
| C | -11.334006 | -2.523070  | -4.547052 |
| C | -10.667608 | -3.752308  | -4.455393 |
| C | -11.324889 | -4.903322  | -4.905034 |
| C | -12.615472 | -4.831503  | -5.432020 |
| C | -13.269588 | -3.602111  | -5.515719 |
| H | -13.122779 | -1.483499  | -5.138061 |
| H | -10.834919 | -1.619357  | -4.204717 |
| H | -10.817319 | -5.862911  | -4.847673 |
| H | -13.107570 | -5.735754  | -5.780086 |
| H | -14.273408 | -3.543210  | -5.926809 |
| C | -9.292466  | -3.835068  | -3.836059 |
| H | -8.819044  | -4.788267  | -4.096788 |
| H | -8.646137  | -3.042357  | -4.234342 |
| C | -9.362729  | -3.697538  | -2.294562 |
| H | -10.024986 | -4.470189  | -1.892407 |
| H | -9.805896  | -2.731117  | -2.040103 |

|   |           |           |           |
|---|-----------|-----------|-----------|
| C | -7.980788 | -3.827116 | -1.704244 |
| H | -7.284726 | -3.016541 | -1.894854 |
| C | -7.387324 | -5.074639 | -1.482195 |
| H | -8.012213 | -5.957173 | -1.510107 |
| H | -6.338168 | -5.194576 | -1.701824 |
| O | -5.447161 | -3.599382 | -0.390879 |
| O | -6.850143 | -4.019190 | 2.333331  |
| C | -6.906319 | -2.732084 | 2.902611  |
| H | -6.924701 | -1.966366 | 2.116112  |
| C | -5.664360 | -2.457774 | 3.762093  |
| H | -5.633120 | -3.133256 | 4.624628  |
| H | -4.749565 | -2.597343 | 3.182428  |
| H | -5.683105 | -1.427326 | 4.139999  |
| C | -8.174946 | -2.536451 | 3.742047  |
| H | -8.255457 | -1.497061 | 4.085459  |
| H | -9.065835 | -2.774961 | 3.158351  |
| H | -8.149960 | -3.182960 | 4.625908  |
| C | -4.802181 | -2.463426 | 0.096036  |
| H | -5.423013 | -1.946037 | 0.846683  |
| C | -4.569119 | -1.468214 | -1.054434 |
| H | -4.071443 | -0.552195 | -0.709463 |
| H | -3.942113 | -1.929466 | -1.827486 |
| H | -5.520914 | -1.187213 | -1.522552 |
| C | -3.473174 | -2.820410 | 0.773193  |
| H | -2.773556 | -3.233709 | 0.039680  |
| H | -3.005219 | -1.944836 | 1.243768  |
| H | -3.641397 | -3.583138 | 1.536992  |

### <sup>2</sup>TS5b

SCF Energy:

Free Energy:

|   |           |           |           |
|---|-----------|-----------|-----------|
| C | -5.465755 | -8.467238 | 0.571385  |
| C | -6.781194 | -8.694590 | 0.782216  |
| H | -4.626677 | -9.135504 | 0.466806  |
| H | -7.341196 | -9.607085 | 0.900391  |
| C | -6.477888 | -6.426951 | 0.716038  |
| N | -7.386375 | -7.443459 | 0.873251  |
| N | -5.296717 | -7.083381 | 0.540058  |
| C | -3.961376 | -6.532239 | 0.537830  |
| C | -3.325214 | -6.267100 | -0.682655 |
| C | -3.309675 | -6.424045 | 1.779636  |
| C | -1.995955 | -5.832969 | -0.635635 |
| C | -1.987729 | -5.968123 | 1.773493  |

|    |            |           |           |   |            |            |           |
|----|------------|-----------|-----------|---|------------|------------|-----------|
| C  | -1.336262  | -5.673797 | 0.578803  | H | -3.392456  | -8.585983  | -2.183289 |
| H  | -1.476374  | -5.614544 | -1.563416 | C | -8.160614  | -6.598020  | 3.549909  |
| H  | -1.460704  | -5.851238 | 2.714743  | H | -7.384649  | -5.936729  | 3.152903  |
| H  | -0.307707  | -5.324428 | 0.595087  | C | -8.752808  | -5.889526  | 4.772699  |
| C  | -8.791463  | -7.271224 | 1.150254  | H | -9.454184  | -6.533648  | 5.318630  |
| C  | -9.175944  | -6.821420 | 2.434026  | H | -7.943520  | -5.625383  | 5.461283  |
| C  | -9.728385  | -7.610427 | 0.153701  | H | -9.266545  | -4.967537  | 4.497311  |
| C  | -10.544174 | -6.630833 | 2.655873  | C | -7.533349  | -7.927955  | 4.015415  |
| C  | -11.084671 | -7.405217 | 0.437637  | H | -7.010807  | -8.458385  | 3.217566  |
| C  | -11.488142 | -6.903325 | 1.668617  | H | -6.806648  | -7.732550  | 4.812050  |
| H  | -10.880233 | -6.268819 | 3.619067  | H | -8.303509  | -8.596596  | 4.420023  |
| H  | -11.828980 | -7.650598 | -0.312804 | C | -9.344122  | -8.271914  | -1.164871 |
| H  | -12.543474 | -6.741760 | 1.869889  | H | -8.263469  | -8.174354  | -1.303448 |
| Ni | -7.088328  | -4.467158 | 0.401527  | C | -9.665458  | -9.778633  | -1.111343 |
| C  | -8.640422  | -3.161685 | 0.056596  | H | -9.164867  | -10.271386 | -0.271579 |
| C  | -9.895860  | -3.650727 | 0.451566  | H | -10.742647 | -9.939898  | -0.991728 |
| C  | -8.422522  | -1.782829 | 0.033549  | H | -9.347628  | -10.272540 | -2.036555 |
| C  | -10.906931 | -2.773801 | 0.839378  | C | -10.032508 | -7.633659  | -2.383484 |
| H  | -10.088561 | -4.719985 | 0.450436  | H | -11.113191 | -7.810523  | -2.373693 |
| C  | -9.434318  | -0.901384 | 0.428037  | H | -9.869886  | -6.553323  | -2.423261 |
| H  | -7.464905  | -1.397151 | -0.298306 | H | -9.637640  | -8.071291  | -3.306870 |
| C  | -10.677593 | -1.393470 | 0.826994  | C | -8.247132  | -4.136305  | -1.842243 |
| H  | -11.871232 | -3.166919 | 1.151304  | C | -7.449575  | -5.243145  | -1.505461 |
| H  | -9.250120  | 0.170052  | 0.415463  | H | -7.940154  | -6.195743  | -1.379645 |
| H  | -11.465928 | -0.706916 | 1.122624  | H | -6.427966  | -5.263131  | -1.854264 |
| C  | -3.995106  | -6.787520 | 3.089114  | O | -5.626731  | -3.520719  | -0.514996 |
| H  | -4.881568  | -7.382281 | 2.854843  | O | -6.987276  | -3.999349  | 2.225813  |
| C  | -4.480338  | -5.526609 | 3.818696  | C | -7.109390  | -2.707950  | 2.767630  |
| H  | -4.967683  | -5.799744 | 4.763428  | H | -7.101889  | -1.956503  | 1.966744  |
| H  | -3.639975  | -4.862074 | 4.052817  | C | -5.924801  | -2.390796  | 3.691139  |
| H  | -5.200550  | -4.974348 | 3.209462  | H | -5.901683  | -3.089651  | 4.535589  |
| C  | -3.104476  | -7.657129 | 3.990318  | H | -4.975987  | -2.465889  | 3.156466  |
| H  | -3.676234  | -7.992852 | 4.862850  | H | -6.016486  | -1.374057  | 4.094893  |
| H  | -2.736206  | -8.542733 | 3.459881  | C | -8.425762  | -2.522916  | 3.535849  |
| H  | -2.236208  | -7.103076 | 4.363708  | H | -8.590936  | -1.463988  | 3.772062  |
| C  | -4.004305  | -6.488216 | -2.022278 | H | -9.270947  | -2.878881  | 2.945190  |
| H  | -5.043536  | -6.765624 | -1.826532 | H | -8.398801  | -3.075512  | 4.481021  |
| C  | -4.012566  | -5.204038 | -2.867483 | C | -4.925647  | -2.454258  | 0.053547  |
| H  | -4.577477  | -5.364201 | -3.794475 | H | -5.561919  | -1.892873  | 0.759410  |
| H  | -4.470655  | -4.388629 | -2.298994 | C | -4.507715  | -1.466971  | -1.050353 |
| H  | -2.995102  | -4.908617 | -3.149715 | H | -3.931979  | -0.627844  | -0.638493 |
| C  | -3.355150  | -7.663372 | -2.774521 | H | -3.884266  | -1.978331  | -1.794018 |
| H  | -3.874025  | -7.843533 | -3.723273 | H | -5.378862  | -1.055347  | -1.573339 |
| H  | -2.303284  | -7.455422 | -3.001317 | C | -3.694574  | -2.933221  | 0.829165  |



|   |           |           |           |   |           |           |           |
|---|-----------|-----------|-----------|---|-----------|-----------|-----------|
| H | -2.979414 | -3.404475 | 0.148436  | C | -0.658322 | 0.852246  | -3.474855 |
| H | -3.188903 | -2.104588 | 1.343821  | C | -1.393875 | 2.030529  | -3.396383 |
| H | -3.991500 | -3.676144 | 1.570822  | H | -1.832857 | 3.784552  | -2.240581 |
| C | -7.694995 | -3.022807 | -2.690956 | H | -0.752473 | 0.233747  | -4.358389 |
| H | -6.872922 | -2.561275 | -2.138460 | H | -2.052743 | 2.311919  | -4.213134 |
| H | -7.217197 | -3.486929 | -3.565792 | C | -3.508396 | -4.198166 | -0.159538 |
| C | -8.738662 | -2.003811 | -3.178081 | C | -3.549850 | -4.042500 | -1.547387 |
| H | -9.431930 | -2.498017 | -3.871438 | C | -2.969523 | -2.915019 | -2.137731 |
| H | -9.331460 | -1.651453 | -2.329134 | C | -2.347299 | -1.953119 | -1.342418 |
| C | -8.074249 | -0.831541 | -3.859738 | C | -2.287213 | -2.127843 | 0.044959  |
| C | -7.789374 | -0.858870 | -5.229748 | C | -2.888294 | -3.235049 | 0.641123  |
| C | -7.670508 | 0.285203  | -3.116225 | H | -3.962345 | -5.070539 | 0.303952  |
| C | -7.116936 | 0.198836  | -5.843341 | H | -4.039045 | -4.789962 | -2.165768 |
| H | -8.099668 | -1.718206 | -5.820364 | H | -3.006663 | -2.782056 | -3.216271 |
| C | -6.996705 | 1.344423  | -3.723790 | H | -1.921663 | -1.065330 | -1.801426 |
| H | -7.891487 | 0.321220  | -2.052863 | H | -2.852989 | -3.324318 | 1.721149  |
| C | -6.716575 | 1.304077  | -5.090992 | C | -3.032239 | -0.376446 | 0.981638  |
| H | -6.907084 | 0.160382  | -6.908974 | H | -3.664665 | -0.317983 | 0.106442  |
| H | -6.691815 | 2.201878  | -3.130011 | H | -3.432164 | -0.904477 | 1.835973  |
| H | -6.192593 | 2.128503  | -5.566396 | C | -2.087819 | 0.635163  | 1.199934  |
| H | -9.318586 | -4.301044 | -1.903981 | H | -1.867601 | 1.264674  | 0.343932  |

**<sup>2</sup>TS5c**

|   |           |           |           |    |           |           |           |
|---|-----------|-----------|-----------|----|-----------|-----------|-----------|
| C | 0.848976  | 0.250667  | 0.931527  | C  | -3.029538 | 2.031382  | 3.121669  |
| C | 2.409877  | 1.539464  | -0.143445 | H  | -3.245478 | 2.885549  | 2.470410  |
| C | 2.919264  | 1.212852  | 1.061079  | H  | -2.717384 | 2.444953  | 4.089607  |
| N | 1.960223  | 0.434326  | 1.708539  | Ni | -0.726973 | -1.131811 | 0.974782  |
| N | 1.149256  | 0.952247  | -0.212158 | O  | 0.578732  | -2.302305 | 0.239821  |
| H | 3.861079  | 1.443258  | 1.529477  | C  | 0.765469  | -3.694791 | 0.129480  |
| H | 2.808340  | 2.120866  | -0.957147 | C  | 0.232667  | -4.499396 | 1.316432  |
| C | 2.209712  | 0.082485  | 3.090572  | H  | 0.562267  | -5.544146 | 1.245576  |
| C | 2.040479  | 1.096989  | 4.052732  | H  | 0.588211  | -4.090329 | 2.260186  |
| C | 2.778186  | -1.167820 | 3.398975  | H  | -0.857523 | -4.484244 | 1.328897  |
| C | 2.437978  | 0.825278  | 5.366300  | C  | 0.228403  | -4.289657 | -1.177420 |
| C | 3.141240  | -1.390901 | 4.732514  | H  | 0.546353  | -5.336649 | -1.270873 |
| C | 2.978121  | -0.408986 | 5.705317  | H  | -0.861637 | -4.262890 | -1.209761 |
| H | 2.315323  | 1.587516  | 6.128969  | H  | 0.611708  | -3.743483 | -2.040153 |
| H | 3.566920  | -2.346767 | 5.012795  | C  | 1.061928  | -0.801329 | -2.586843 |
| H | 3.275655  | -0.608673 | 6.730944  | C  | 2.534199  | -0.437425 | -2.871516 |
| C | 0.263173  | 1.281210  | -1.305780 | C  | 0.571516  | -1.737884 | -3.699449 |
| C | -0.437336 | 2.504136  | -1.220004 | H  | 1.017313  | -1.347695 | -1.635389 |
| C | 0.203340  | 0.450763  | -2.443460 | H  | 2.996667  | 0.106664  | -2.046476 |
| C | -1.273195 | 2.856433  | -2.284435 | H  | 3.115491  | -1.353761 | -3.023147 |

|   |           |           |           |
|---|-----------|-----------|-----------|
| H | 2.619498  | 0.171767  | -3.780277 |
| H | -0.464832 | -2.052377 | -3.547161 |
| H | 0.658076  | -1.276510 | -4.690898 |
| H | 1.191406  | -2.638579 | -3.714190 |
| C | -0.275773 | 3.456028  | -0.040213 |
| C | -1.590686 | 4.136876  | 0.373376  |
| C | 0.780734  | 4.535935  | -0.345630 |
| H | 0.078176  | 2.874888  | 0.814849  |
| H | -2.407750 | 3.419002  | 0.475921  |
| H | -1.459218 | 4.642580  | 1.336051  |
| H | -1.897528 | 4.896895  | -0.353679 |
| H | 1.757534  | 4.101242  | -0.569811 |
| H | 0.472519  | 5.140091  | -1.206672 |
| H | 0.899273  | 5.204479  | 0.515041  |
| C | 3.038197  | -2.216252 | 2.327523  |
| C | 3.186397  | -3.632430 | 2.901437  |
| C | 4.300029  | -1.878923 | 1.506852  |
| H | 2.183342  | -2.204523 | 1.642810  |
| H | 2.363445  | -3.890963 | 3.574147  |
| H | 3.191818  | -4.358837 | 2.083505  |
| H | 4.128472  | -3.751122 | 3.451602  |
| H | 4.203513  | -0.934710 | 0.966064  |
| H | 5.183807  | -1.817320 | 2.154464  |
| H | 4.477196  | -2.665435 | 0.764488  |
| C | 1.473930  | 2.469012  | 3.715570  |
| C | 2.580882  | 3.538041  | 3.670948  |
| C | 0.365941  | 2.892137  | 4.695513  |
| H | 1.030349  | 2.415186  | 2.718556  |
| H | 3.344855  | 3.297201  | 2.925768  |
| H | 2.157179  | 4.516826  | 3.416373  |
| H | 3.076082  | 3.626068  | 4.644693  |
| H | -0.381051 | 2.103998  | 4.817591  |
| H | 0.773642  | 3.125981  | 5.685008  |
| H | -0.138538 | 3.793188  | 4.327854  |
| O | -1.335122 | -1.664184 | 2.772422  |
| H | 1.863443  | -3.844362 | 0.109204  |
| C | -4.274806 | 1.197991  | 3.292810  |
| C | -5.370041 | 1.353821  | 2.436177  |
| C | -4.324752 | 0.188753  | 4.264219  |
| C | -6.484310 | 0.517572  | 2.534919  |
| H | -5.343101 | 2.131530  | 1.676197  |
| C | -5.432121 | -0.650389 | 4.365488  |
| H | -3.475370 | 0.043706  | 4.925162  |
| C | -6.516194 | -0.491012 | 3.497599  |

|   |           |           |          |
|---|-----------|-----------|----------|
| H | -7.323094 | 0.651934  | 1.857192 |
| H | -5.446730 | -1.434607 | 5.117313 |
| H | -7.377802 | -1.148313 | 3.573163 |
| C | -0.649293 | -2.244465 | 3.832532 |
| H | 0.377883  | -2.524419 | 3.539537 |
| C | -1.374489 | -3.519512 | 4.297971 |
| H | -1.447200 | -4.246130 | 3.485033 |
| H | -0.862771 | -3.996989 | 5.144654 |
| H | -2.393081 | -3.259116 | 4.613658 |
| C | -0.524387 | -1.277680 | 5.023307 |
| H | -1.523017 | -1.024397 | 5.403189 |
| H | 0.053206  | -1.715346 | 5.846933 |
| H | -0.027477 | -0.355534 | 4.717901 |

**<sup>2</sup>TSSd**

|   |           |           |           |
|---|-----------|-----------|-----------|
| C | 0.650578  | 0.188938  | 1.356363  |
| C | 2.620182  | 1.263632  | 0.902398  |
| C | 2.673282  | 0.855663  | 2.186039  |
| N | 1.468353  | 0.209038  | 2.450774  |
| N | 1.376951  | 0.875750  | 0.408138  |
| H | 3.426780  | 0.973574  | 2.945947  |
| H | 3.329248  | 1.794811  | 0.291916  |
| C | 1.160193  | -0.131090 | 3.820711  |
| C | 0.473758  | 0.828575  | 4.589806  |
| C | 1.691349  | -1.311808 | 4.368845  |
| C | 0.335733  | 0.580116  | 5.958964  |
| C | 1.534738  | -1.503628 | 5.746777  |
| C | 0.868598  | -0.569478 | 6.533878  |
| H | -0.195573 | 1.293318  | 6.579608  |
| H | 1.924784  | -2.405122 | 6.205301  |
| H | 0.755278  | -0.743353 | 7.600394  |
| C | 0.895027  | 1.441768  | -0.834744 |
| C | 0.501564  | 2.800508  | -0.811541 |
| C | 0.914983  | 0.685347  | -2.025586 |
| C | -0.011255 | 3.353923  | -1.988841 |
| C | 0.372944  | 1.290207  | -3.169615 |
| C | -0.106128 | 2.596231  | -3.150045 |
| H | -0.336364 | 4.388809  | -1.994711 |
| H | 0.342234  | 0.734887  | -4.098235 |
| H | -0.522072 | 3.033840  | -4.053377 |
| C | -2.863256 | -4.293570 | -1.348680 |
| C | -2.626916 | -3.868949 | -2.659550 |
| C | -2.102645 | -2.595410 | -2.892676 |

|    |           |           |           |   |           |           |           |
|----|-----------|-----------|-----------|---|-----------|-----------|-----------|
| C  | -1.803863 | -1.751867 | -1.819601 | H | -1.415386 | 4.181026  | 0.745278  |
| C  | -2.011890 | -2.196897 | -0.511292 | H | -0.273657 | 5.217164  | 1.603952  |
| C  | -2.570945 | -3.453395 | -0.273679 | H | -0.528587 | 5.439851  | -0.126065 |
| H  | -3.277961 | -5.281054 | -1.162567 | H | 2.874496  | 3.875518  | 0.078142  |
| H  | -2.862650 | -4.521334 | -3.495700 | H | 1.925313  | 5.197820  | -0.605582 |
| H  | -1.935868 | -2.253330 | -3.910881 | H | 2.190730  | 5.110906  | 1.147348  |
| H  | -1.413372 | -0.755389 | -2.007975 | C | 2.395068  | -2.351561 | 3.506479  |
| H  | -2.751704 | -3.747342 | 0.754059  | C | 2.199862  | -3.780026 | 4.040522  |
| C  | -3.183719 | -0.757734 | 0.552841  | C | 3.906055  | -2.073785 | 3.379857  |
| H  | -3.694961 | -0.564070 | -0.384016 | H | 1.948422  | -2.293456 | 2.508592  |
| H  | -3.573610 | -1.533533 | 1.196632  | H | 1.152322  | -3.990413 | 4.271200  |
| C  | -2.428335 | 0.260505  | 1.132352  | H | 2.531775  | -4.500954 | 3.287217  |
| H  | -2.285632 | 0.230352  | 2.204327  | H | 2.792269  | -3.956801 | 4.946703  |
| C  | -2.276686 | 1.581337  | 0.433138  | H | 4.114681  | -1.131933 | 2.867798  |
| H  | -1.484216 | 2.155499  | 0.911748  | H | 4.380286  | -2.040946 | 4.368624  |
| H  | -1.976912 | 1.430027  | -0.609597 | H | 4.383010  | -2.873835 | 2.802135  |
| C  | -3.589090 | 2.412611  | 0.431009  | C | -0.056733 | 2.122549  | 3.984607  |
| H  | -4.374120 | 1.815315  | -0.049501 | C | 0.992360  | 3.245062  | 4.108130  |
| H  | -3.433487 | 3.291885  | -0.205547 | C | -1.389760 | 2.584058  | 4.588637  |
| Ni | -0.845041 | -1.267321 | 0.915657  | H | -0.235455 | 1.942630  | 2.920590  |
| O  | 0.716457  | -2.258448 | 0.516641  | H | 1.929432  | 2.984203  | 3.607828  |
| C  | 1.023968  | -3.627662 | 0.406713  | H | 0.614600  | 4.172252  | 3.661346  |
| C  | 0.208618  | -4.544016 | 1.323663  | H | 1.214217  | 3.444121  | 5.163102  |
| H  | 0.688071  | -5.529654 | 1.390372  | H | -2.144615 | 1.795033  | 4.565593  |
| H  | 0.137653  | -4.114749 | 2.320316  | H | -1.274069 | 2.914295  | 5.627304  |
| H  | -0.806149 | -4.680091 | 0.951192  | H | -1.781366 | 3.431041  | 4.018718  |
| C  | 0.977005  | -4.129177 | -1.042875 | O | -1.816152 | -2.254960 | 2.324374  |
| H  | 1.242015  | -5.193466 | -1.091310 | H | 2.078733  | -3.717974 | 0.734734  |
| H  | -0.020915 | -4.003758 | -1.469528 | C | -4.048642 | 2.859615  | 1.800883  |
| H  | 1.689709  | -3.578713 | -1.662971 | C | -4.627452 | 1.955729  | 2.704361  |
| C  | 1.564680  | -0.691317 | -2.110100 | C | -3.901448 | 4.193047  | 2.203574  |
| C  | 3.090033  | -0.597484 | -1.894122 | C | -5.024302 | 2.367927  | 3.975835  |
| C  | 1.313425  | -1.396969 | -3.448649 | H | -4.769572 | 0.920884  | 2.409299  |
| H  | 1.165314  | -1.310879 | -1.298244 | C | -4.303823 | 4.612573  | 3.473124  |
| H  | 3.346067  | -0.264839 | -0.887557 | H | -3.477332 | 4.914578  | 1.510006  |
| H  | 3.537764  | -1.588137 | -2.030401 | C | -4.861556 | 3.698589  | 4.366984  |
| H  | 3.550828  | 0.085295  | -2.619319 | H | -5.464390 | 1.648094  | 4.660285  |
| H  | 0.250306  | -1.499673 | -3.675057 | H | -4.182768 | 5.653466  | 3.760799  |
| H  | 1.797790  | -0.870364 | -4.280674 | H | -5.173437 | 4.020290  | 5.356495  |
| H  | 1.733937  | -2.405106 | -3.413032 | C | -1.600562 | -2.402636 | 3.685975  |
| C  | 0.701411  | 3.702399  | 0.404054  | H | -0.526982 | -2.358475 | 3.930080  |
| C  | -0.452426 | 4.684364  | 0.663566  | C | -2.117389 | -3.780000 | 4.137097  |
| C  | 2.004483  | 4.514007  | 0.247260  | H | -1.615740 | -4.579389 | 3.583936  |
| H  | 0.801896  | 3.072932  | 1.290390  | H | -1.957095 | -3.941668 | 5.211462  |

|   |           |           |          |
|---|-----------|-----------|----------|
| H | -3.193526 | -3.853793 | 3.933635 |
| C | -2.303919 | -1.300627 | 4.498231 |
| H | -3.385121 | -1.335207 | 4.308863 |
| H | -2.132532 | -1.404599 | 5.576979 |
| H | -1.936161 | -0.316059 | 4.201561 |

**<sup>2</sup>TS6**

|   |           |           |           |
|---|-----------|-----------|-----------|
| C | 0.342621  | 0.586191  | -2.645039 |
| C | -1.012364 | 0.564919  | -2.540647 |
| H | 0.993488  | 0.772457  | -3.484204 |
| H | -1.790340 | 0.724406  | -3.269924 |
| C | -0.165128 | 0.112744  | -0.472401 |
| N | -1.299994 | 0.277657  | -1.209816 |
| N | 0.837962  | 0.308283  | -1.377347 |
| C | 2.224084  | 0.223872  | -1.009284 |
| C | 2.898719  | 1.410137  | -0.679046 |
| C | 2.824216  | -1.044364 | -0.936458 |
| C | 4.239019  | 1.303627  | -0.293851 |
| C | 4.165488  | -1.098221 | -0.541601 |
| C | 4.867697  | 0.062793  | -0.226951 |
| H | 4.790084  | 2.201021  | -0.029153 |
| H | 4.661318  | -2.061696 | -0.474035 |
| H | 5.907814  | -0.000956 | 0.080424  |
| C | -2.615270 | 0.135277  | -0.649799 |
| C | -3.146483 | -1.156857 | -0.511607 |
| C | -3.287076 | 1.292973  | -0.220767 |
| C | -4.411693 | -1.271698 | 0.075874  |
| C | -4.549111 | 1.125120  | 0.357334  |
| C | -5.106262 | -0.144032 | 0.503868  |
| H | -4.851475 | -2.255912 | 0.205074  |
| H | -5.097004 | 1.993568  | 0.707995  |
| H | -6.086046 | -0.253709 | 0.960386  |
| C | -2.635242 | 2.665312  | -0.306478 |
| H | -1.839538 | 2.615244  | -1.056820 |
| C | -1.973142 | 3.018802  | 1.039370  |
| H | -2.728426 | 3.088591  | 1.831555  |
| H | -1.240914 | 2.259794  | 1.332387  |
| H | -1.461137 | 3.986329  | 0.970138  |
| C | -3.611633 | 3.763556  | -0.752986 |
| H | -4.107952 | 3.502224  | -1.694286 |
| H | -4.388115 | 3.948342  | -0.002380 |
| H | -3.072004 | 4.705747  | -0.899475 |
| C | -2.385529 | -2.398691 | -0.950517 |

|    |           |           |           |
|----|-----------|-----------|-----------|
| H  | -1.463954 | -2.076270 | -1.443648 |
| C  | -1.980759 | -3.254999 | 0.262597  |
| H  | -1.393368 | -4.120824 | -0.064671 |
| H  | -1.376860 | -2.685455 | 0.976289  |
| H  | -2.864948 | -3.628193 | 0.792678  |
| C  | -3.187787 | -3.219509 | -1.973988 |
| H  | -4.114468 | -3.610092 | -1.538609 |
| H  | -3.456919 | -2.613957 | -2.846685 |
| H  | -2.597278 | -4.075801 | -2.319040 |
| C  | 2.207837  | 2.764754  | -0.697872 |
| H  | 1.166875  | 2.611368  | -0.995632 |
| C  | 2.851790  | 3.706001  | -1.729498 |
| H  | 3.898574  | 3.914445  | -1.480106 |
| H  | 2.829574  | 3.269624  | -2.734758 |
| H  | 2.318597  | 4.663146  | -1.759557 |
| C  | 2.184660  | 3.390608  | 0.706831  |
| H  | 1.699327  | 2.712323  | 1.415356  |
| H  | 3.198484  | 3.602299  | 1.066591  |
| H  | 1.630088  | 4.336425  | 0.690511  |
| C  | 2.070286  | -2.322976 | -1.268663 |
| H  | 1.030133  | -2.058608 | -1.477711 |
| C  | 2.642903  | -2.980204 | -2.536591 |
| H  | 2.609919  | -2.293461 | -3.390152 |
| H  | 3.686582  | -3.281648 | -2.390229 |
| H  | 2.068072  | -3.876942 | -2.795070 |
| C  | 2.059518  | -3.301105 | -0.081381 |
| H  | 3.072737  | -3.642138 | 0.162382  |
| H  | 1.627114  | -2.841677 | 0.813160  |
| H  | 1.464704  | -4.186911 | -0.334032 |
| Ni | 0.121324  | -0.379277 | 1.341660  |
| O  | 0.379670  | -1.741919 | 2.680655  |
| C  | 0.876309  | -0.665985 | 3.235651  |
| H  | 0.653191  | 0.841942  | 2.142122  |
| C  | 2.392585  | -0.564248 | 3.314430  |
| H  | 2.752624  | -1.253687 | 4.093171  |
| H  | 2.845931  | -0.852876 | 2.363110  |
| H  | 2.714607  | 0.449592  | 3.569065  |
| C  | 0.110994  | -0.076628 | 4.409174  |
| H  | 0.439740  | 0.941468  | 4.636739  |
| H  | -0.960891 | -0.071311 | 4.197337  |
| H  | 0.284364  | -0.707721 | 5.293902  |

**<sup>4</sup>TS6**

|   |           |           |           |                         |           |           |           |
|---|-----------|-----------|-----------|-------------------------|-----------|-----------|-----------|
| C | 0.380100  | 0.665087  | -2.447910 | H                       | -2.328395 | -4.168532 | -1.881436 |
| C | -0.973758 | 0.578131  | -2.406158 | C                       | 2.207441  | 2.688298  | 0.013000  |
| H | 1.061282  | 0.853296  | -3.262335 | H                       | 1.145472  | 2.484482  | 0.178429  |
| H | -1.723617 | 0.685853  | -3.173272 | C                       | 2.334396  | 3.574745  | -1.240449 |
| C | -0.201548 | 0.206941  | -0.288968 | H                       | 3.386725  | 3.794061  | -1.457238 |
| N | -1.307435 | 0.300410  | -1.087611 | H                       | 1.903152  | 3.088120  | -2.121875 |
| N | 0.834308  | 0.432263  | -1.151901 | H                       | 1.811989  | 4.526665  | -1.090267 |
| C | 2.221448  | 0.275906  | -0.807983 | C                       | 2.710491  | 3.423527  | 1.260805  |
| C | 2.900214  | 1.353615  | -0.216281 | H                       | 2.635927  | 2.780777  | 2.142901  |
| C | 2.828289  | -0.963547 | -1.077500 | H                       | 3.748040  | 3.761421  | 1.153236  |
| C | 4.247031  | 1.159337  | 0.108173  | H                       | 2.094530  | 4.312049  | 1.436550  |
| C | 4.177742  | -1.105394 | -0.735972 | C                       | 2.035406  | -2.131755 | -1.650335 |
| C | 4.878666  | -0.055360 | -0.148705 | H                       | 1.164197  | -1.725786 | -2.173470 |
| H | 4.806677  | 1.964870  | 0.570545  | C                       | 2.833562  | -2.948586 | -2.677237 |
| H | 4.680732  | -2.049063 | -0.918652 | H                       | 3.243635  | -2.309978 | -3.467362 |
| H | 5.924568  | -0.185734 | 0.114961  | H                       | 3.666488  | -3.487554 | -2.212341 |
| C | -2.645028 | 0.145941  | -0.586773 | H                       | 2.183857  | -3.697306 | -3.143677 |
| C | -3.133733 | -1.151418 | -0.360451 | C                       | 1.507305  | -3.033969 | -0.518679 |
| C | -3.397490 | 1.305414  | -0.325861 | H                       | 2.338464  | -3.483922 | 0.036853  |
| C | -4.438778 | -1.268053 | 0.132352  | H                       | 0.893576  | -2.474177 | 0.192183  |
| C | -4.701035 | 1.133484  | 0.148765  | H                       | 0.898302  | -3.845585 | -0.934266 |
| C | -5.216656 | -0.140320 | 0.377802  | Ni                      | -0.386835 | 0.400168  | 1.734151  |
| H | -4.847331 | -2.255226 | 0.325175  | O                       | 0.046443  | -1.195828 | 2.796747  |
| H | -5.312395 | 2.006069  | 0.356424  | C                       | 1.185771  | -0.677645 | 3.196731  |
| H | -6.228706 | -0.253586 | 0.756241  | H                       | 0.984150  | 0.980279  | 2.369459  |
| C | -2.834382 | 2.700248  | -0.553066 | C                       | 2.475307  | -1.142433 | 2.572086  |
| H | -1.764748 | 2.604132  | -0.761562 | H                       | 2.791500  | -2.090363 | 3.040843  |
| C | -2.967676 | 3.580869  | 0.699605  | H                       | 2.352037  | -1.320332 | 1.506338  |
| H | -4.016690 | 3.766680  | 0.957069  | H                       | 3.279115  | -0.414060 | 2.715342  |
| H | -2.480830 | 3.103432  | 1.556975  | C                       | 1.241189  | -0.168734 | 4.615193  |
| H | -2.490181 | 4.552462  | 0.527689  | H                       | 2.150273  | 0.410112  | 4.808967  |
| C | -3.492552 | 3.361337  | -1.776935 | H                       | 0.362491  | 0.451973  | 4.822016  |
| H | -3.353599 | 2.756744  | -2.680549 | H                       | 1.218174  | -1.021333 | 5.311640  |
| H | -4.570705 | 3.486433  | -1.623474 |                         |           |           |           |
| H | -3.059820 | 4.351740  | -1.958760 | <b><sup>2</sup>TS7a</b> |           |           |           |
| C | -2.299857 | -2.396136 | -0.620929 | C                       | -1.402210 | 0.074782  | 1.219401  |
| H | -1.338501 | -2.082023 | -1.035741 | N                       | -1.572732 | -0.300687 | -0.083877 |
| C | -2.009296 | -3.151687 | 0.687736  | C                       | -0.474063 | -1.002805 | -0.569925 |
| H | -1.407899 | -4.044279 | 0.479957  | C                       | -2.742330 | 0.027171  | -0.848102 |
| H | -1.457163 | -2.528672 | 1.397658  | N                       | -0.162542 | -0.418593 | 1.529428  |
| H | -2.939060 | -3.479228 | 1.167483  | C                       | 0.417436  | -1.077450 | 0.451540  |
| C | -2.971510 | -3.308733 | -1.661293 | C                       | 0.418647  | -0.296850 | 2.838687  |
| H | -3.930073 | -3.695782 | -1.297428 | C                       | -3.882814 | -0.780810 | -0.711107 |
| H | -3.160677 | -2.772826 | -2.598325 | C                       | -2.705094 | 1.164001  | -1.671764 |

|   |           |           |           |                         |           |           |           |
|---|-----------|-----------|-----------|-------------------------|-----------|-----------|-----------|
| C | -5.017464 | -0.423604 | -1.447432 | H                       | -1.879579 | -2.500242 | 5.248548  |
| C | -3.916477 | -1.973057 | 0.232583  | H                       | -0.543413 | -4.709866 | 3.422469  |
| C | -5.007810 | 0.691505  | -2.281829 | H                       | 0.276392  | -3.967906 | 4.802104  |
| C | -3.863025 | 1.477079  | -2.391342 | H                       | 1.025666  | -3.908386 | 3.199352  |
| C | -1.481835 | 2.065153  | -1.745528 | H                       | 2.966818  | 3.078209  | 1.176238  |
| C | -4.775378 | -1.653549 | 1.469045  | H                       | 3.415282  | 1.427964  | 1.656130  |
| C | -4.395444 | -3.253943 | -0.468928 | H                       | 3.287584  | 2.705323  | 2.875061  |
| C | -1.759570 | 3.403284  | -1.037694 | H                       | 0.686403  | 4.028132  | 1.807398  |
| C | -1.007738 | 2.276157  | -3.192196 | H                       | 0.858309  | 3.600797  | 3.522510  |
| C | 0.188285  | -1.323604 | 3.769731  | H                       | -0.523024 | 2.986966  | 2.585719  |
| C | 1.151597  | 0.860734  | 3.147932  | H                       | -0.437056 | -1.371555 | -1.582442 |
| C | 0.724245  | -1.164666 | 5.052031  | H                       | 1.393564  | -1.530358 | 0.519517  |
| C | -0.663384 | -2.538271 | 3.432633  | H                       | -2.985773 | 2.468949  | 2.042838  |
| C | 1.448402  | -0.025114 | 5.391564  | Ni                      | -2.521428 | 1.033833  | 2.419307  |
| C | 1.660291  | 0.974331  | 4.446317  | C                       | 1.306422  | 2.786497  | 7.835238  |
| C | 1.354603  | 1.981040  | 2.139744  | C                       | 0.079641  | 2.877975  | 7.178374  |
| C | -2.017332 | -2.468179 | 4.161209  | C                       | -0.928128 | 1.926742  | 7.389771  |
| C | 0.069514  | -3.855566 | 3.731944  | C                       | -0.668990 | 0.876836  | 8.279900  |
| C | 2.843563  | 2.314499  | 1.952633  | C                       | 0.555629  | 0.779127  | 8.942228  |
| C | 0.544054  | 3.225713  | 2.541080  | C                       | 1.550561  | 1.734063  | 8.721302  |
| H | -5.919747 | -1.021161 | -1.360388 | H                       | 2.071374  | 3.538783  | 7.660081  |
| H | -5.899522 | 0.953494  | -2.844617 | H                       | -0.103144 | 3.695581  | 6.484505  |
| H | -3.871928 | 2.353263  | -3.032535 | H                       | -1.438082 | 0.127123  | 8.451705  |
| H | 0.547580  | -1.928867 | 5.802858  | H                       | 0.732524  | -0.040998 | 9.633412  |
| H | 1.821238  | 0.101658  | 6.402365  | H                       | 2.503249  | 1.663201  | 9.238964  |
| H | 2.206252  | 1.867763  | 4.731825  | C                       | -2.204653 | 1.971704  | 6.588102  |
| H | -2.896792 | -2.154785 | 0.584761  | H                       | -3.024087 | 1.493112  | 7.138852  |
| H | -0.666887 | 1.577833  | -1.202827 | H                       | -2.504214 | 3.010818  | 6.403275  |
| H | -0.873552 | -2.519143 | 2.359199  | C                       | -2.004430 | 1.252367  | 5.228309  |
| H | 0.968539  | 1.643044  | 1.173416  | H                       | -1.702388 | 0.220755  | 5.438667  |
| H | -4.768048 | -2.496891 | 2.169402  | H                       | -1.134482 | 1.714022  | 4.745869  |
| H | -5.815066 | -1.453806 | 1.183700  | C                       | -3.185636 | 1.270783  | 4.285845  |
| H | -4.386168 | -0.770581 | 1.989949  | H                       | -4.014337 | 0.606467  | 4.535996  |
| H | -4.339902 | -4.104541 | 0.219868  | C                       | -3.497365 | 2.448856  | 3.521552  |
| H | -3.779210 | -3.481736 | -1.345800 | H                       | -2.963268 | 3.372447  | 3.752583  |
| H | -5.435559 | -3.168787 | -0.803065 | H                       | -4.539874 | 2.634721  | 3.265972  |
| H | -0.859616 | 4.030200  | -1.041075 |                         |           |           |           |
| H | -2.064296 | 3.230325  | -0.000446 |                         |           |           |           |
| H | -2.559882 | 3.956580  | -1.543646 |                         |           |           |           |
| H | -0.092690 | 2.879089  | -3.206924 |                         |           |           |           |
| H | -1.759313 | 2.802888  | -3.791007 |                         |           |           |           |
| H | -0.796747 | 1.320741  | -3.685922 |                         |           |           |           |
| H | -2.649655 | -3.317201 | 3.874715  |                         |           |           |           |
| H | -2.543207 | -1.540983 | 3.911998  |                         |           |           |           |
|   |           |           |           | <b><sup>4</sup>TS7a</b> |           |           |           |
|   |           |           |           | C                       | -0.255138 | 1.066580  | 0.287843  |
|   |           |           |           | N                       | -1.306303 | 0.810099  | -0.559928 |
|   |           |           |           | C                       | -0.884221 | 0.192114  | -1.733356 |
|   |           |           |           | C                       | -2.679455 | 1.113579  | -0.266026 |

|   |           |           |           |    |           |           |           |
|---|-----------|-----------|-----------|----|-----------|-----------|-----------|
| N | 0.820505  | 0.535025  | -0.384774 | H  | -2.011053 | 4.054859  | -3.458863 |
| C | 0.455458  | 0.014511  | -1.621254 | H  | -3.695032 | 3.621175  | -3.106588 |
| C | 2.150918  | 0.509747  | 0.150038  | H  | -2.486785 | 2.348972  | -3.345832 |
| C | -3.454050 | 0.147770  | 0.405167  | H  | 0.830009  | -2.805083 | 3.088005  |
| C | -3.192849 | 2.353515  | -0.676343 | H  | 1.678702  | -1.328253 | 3.580979  |
| C | -4.796777 | 0.456501  | 0.644610  | H  | 2.587041  | -2.715341 | 2.947884  |
| C | -2.865618 | -1.192771 | 0.828507  | H  | 0.743122  | -3.501211 | 0.656026  |
| C | -5.337700 | 1.673807  | 0.234189  | H  | 2.480090  | -3.240556 | 0.391954  |
| C | -4.544052 | 2.611807  | -0.417917 | H  | 1.289593  | -2.392954 | -0.612691 |
| C | -2.334381 | 3.369554  | -1.413821 | H  | 2.967393  | 3.156781  | -3.286854 |
| C | -3.539329 | -1.785899 | 2.073339  | H  | 2.980544  | 1.407283  | -2.989195 |
| C | -2.922030 | -2.214515 | -0.324234 | H  | 4.375711  | 2.393259  | -2.525719 |
| C | -2.475971 | 4.784458  | -0.834286 | H  | 2.655335  | 4.786997  | -1.350571 |
| C | -2.650211 | 3.345614  | -2.920245 | H  | 4.095457  | 4.147600  | -0.545438 |
| C | 2.491671  | -0.523811 | 1.043054  | H  | 2.536494  | 4.184152  | 0.313764  |
| C | 3.050995  | 1.516407  | -0.230545 | H  | -1.573494 | -0.056921 | -2.523663 |
| C | 3.798083  | -0.542304 | 1.539092  | H  | 1.177475  | -0.424550 | -2.290724 |
| C | 1.478415  | -1.595866 | 1.419787  | H  | -1.455556 | 2.572234  | 2.450784  |
| C | 4.720040  | 0.433902  | 1.162394  | Ni | -0.096766 | 2.582579  | 1.604338  |
| C | 4.350060  | 1.451262  | 0.289012  | C  | -2.151098 | -3.720781 | 5.260359  |
| C | 2.655154  | 2.622767  | -1.195939 | C  | -1.377439 | -2.560362 | 5.205103  |
| C | 1.661962  | -2.137150 | 2.843066  | C  | -1.954091 | -1.299761 | 5.400260  |
| C | 1.499493  | -2.750013 | 0.399773  | C  | -3.327345 | -1.231633 | 5.670616  |
| C | 3.280795  | 2.379062  | -2.581005 | C  | -4.105819 | -2.387232 | 5.727345  |
| C | 3.012939  | 4.016407  | -0.657998 | C  | -3.520693 | -3.637597 | 5.516501  |
| H | -5.426196 | -0.259858 | 1.160948  | H  | -1.683025 | -4.689786 | 5.107991  |
| H | -6.384062 | 1.892255  | 0.429528  | H  | -0.310368 | -2.630143 | 5.014248  |
| H | -4.974619 | 3.559097  | -0.726559 | H  | -3.789463 | -0.259979 | 5.830860  |
| H | 4.100013  | -1.322826 | 2.229072  | H  | -5.169341 | -2.312483 | 5.937656  |
| H | 5.731301  | 0.401803  | 1.558404  | H  | -4.125466 | -4.538979 | 5.559881  |
| H | 5.074164  | 2.210486  | 0.010488  | C  | -1.139612 | -0.038718 | 5.246294  |
| H | -1.811446 | -1.022109 | 1.071212  | H  | -1.460470 | 0.708151  | 5.984040  |
| H | -1.286754 | 3.081179  | -1.285164 | H  | -0.079669 | -0.240272 | 5.438056  |
| H | 0.486793  | -1.135435 | 1.377484  | C  | -1.291267 | 0.564327  | 3.828041  |
| H | 1.567233  | 2.596362  | -1.308414 | H  | -2.355478 | 0.714278  | 3.616177  |
| H | -2.958002 | -2.632605 | 2.451161  | H  | -0.921035 | -0.152895 | 3.088292  |
| H | -4.546096 | -2.156993 | 1.847838  | C  | -0.540505 | 1.866593  | 3.695112  |
| H | -3.620286 | -1.057803 | 2.882240  | H  | -0.901384 | 2.660672  | 4.348407  |
| H | -2.491759 | -3.170802 | -0.003927 | C  | 0.837485  | 1.904671  | 3.349363  |
| H | -2.366313 | -1.874209 | -1.201535 | H  | 1.345029  | 0.983086  | 3.079047  |
| H | -3.961019 | -2.393406 | -0.625386 | H  | 1.471694  | 2.684985  | 3.760942  |
| H | -1.783639 | 5.465465  | -1.342316 |    |           |           |           |
| H | -2.233068 | 4.785992  | 0.233139  |    |           |           |           |
| H | -3.488624 | 5.183592  | -0.965162 |    |           |           |           |

**<sup>2</sup>TS7b**

|   |           |           |           |    |           |           |           |
|---|-----------|-----------|-----------|----|-----------|-----------|-----------|
| C | 0.304178  | 0.780410  | -0.197872 | H  | -4.958505 | -0.349939 | 1.351256  |
| N | -0.942146 | 0.845639  | -0.760517 | H  | 0.809466  | 4.807410  | -2.052622 |
| C | -1.110031 | -0.104972 | -1.761673 | H  | 0.559519  | 4.081766  | -0.450188 |
| C | -1.949003 | 1.776880  | -0.336860 | H  | -0.474837 | 5.420438  | -0.991584 |
| N | 0.903980  | -0.239257 | -0.885459 | H  | -0.827039 | 4.298487  | -3.951020 |
| C | 0.058916  | -0.790737 | -1.842849 | H  | -2.159380 | 4.965587  | -2.999051 |
| C | 2.252182  | -0.657743 | -0.626414 | H  | -2.277903 | 3.321167  | -3.644173 |
| C | -2.857992 | 1.374155  | 0.656120  | H  | 0.370813  | -2.341579 | 2.979326  |
| C | -1.959725 | 3.062504  | -0.901568 | H  | 1.091550  | -0.790887 | 2.494071  |
| C | -3.820862 | 2.302105  | 1.064984  | H  | 2.133334  | -2.131772 | 3.022376  |
| C | -2.798712 | -0.005574 | 1.292698  | H  | 0.513285  | -4.359446 | 1.409987  |
| C | -3.857474 | 3.584088  | 0.523729  | H  | 2.275922  | -4.288443 | 1.491674  |
| C | -2.933208 | 3.959377  | -0.446759 | H  | 1.468231  | -4.264761 | -0.084209 |
| C | -0.929308 | 3.499303  | -1.931085 | H  | 3.417007  | 1.711186  | -4.305482 |
| C | -2.578770 | 0.089928  | 2.811324  | H  | 3.278102  | -0.038886 | -4.037351 |
| C | -4.054744 | -0.825367 | 0.952864  | H  | 4.751457  | 0.819928  | -3.561245 |
| C | 0.050407  | 4.514678  | -1.317431 | H  | 3.322039  | 3.330337  | -2.323267 |
| C | -1.590226 | 4.051923  | -3.204063 | H  | 4.639481  | 2.479464  | -1.494519 |
| C | 2.464547  | -1.701183 | 0.290075  | H  | 3.079750  | 2.704768  | -0.676314 |
| C | 3.300051  | 0.023577  | -1.266891 | H  | -2.034286 | -0.196422 | -2.309279 |
| C | 3.788786  | -2.063137 | 0.557887  | H  | 0.370352  | -1.605504 | -2.476654 |
| C | 1.310197  | -2.377864 | 1.013756  | Ni | 1.049226  | 1.867979  | 1.163553  |
| C | 4.849669  | -1.407886 | -0.063618 | C  | -3.704333 | 6.537955  | 3.172375  |
| C | 4.606835  | -0.375915 | -0.966520 | C  | -2.487118 | 5.995982  | 2.754463  |
| C | 3.046793  | 1.172881  | -2.230366 | C  | -2.115933 | 4.693127  | 3.103445  |
| C | 1.222445  | -1.877402 | 2.467113  | C  | -2.995214 | 3.947591  | 3.901798  |
| C | 1.401170  | -3.910627 | 0.950605  | C  | -4.210964 | 4.481882  | 4.324416  |
| C | 3.659486  | 0.896796  | -3.613267 | C  | -4.574319 | 5.780415  | 3.957139  |
| C | 3.553329  | 2.501831  | -1.643206 | H  | -3.971967 | 7.551373  | 2.884538  |
| H | -4.529195 | 2.031237  | 1.841086  | H  | -1.817974 | 6.586601  | 2.133059  |
| H | -4.584133 | 4.302912  | 0.889012  | H  | -2.733794 | 2.928950  | 4.173420  |
| H | -2.955266 | 4.969262  | -0.844641 | H  | -4.879938 | 3.883101  | 4.937405  |
| H | 3.991861  | -2.858686 | 1.268029  | H  | -5.522982 | 6.197389  | 4.283859  |
| H | 5.871597  | -1.701168 | 0.160323  | C  | -0.846361 | 4.079683  | 2.565174  |
| H | 5.441658  | 0.133005  | -1.438907 | H  | -1.112290 | 3.267233  | 1.876844  |
| H | -1.934717 | -0.533226 | 0.879684  | H  | -0.313450 | 4.824620  | 1.965364  |
| H | -0.345310 | 2.620363  | -2.219901 | C  | 0.096517  | 3.495456  | 3.626341  |
| H | 0.380885  | -2.086309 | 0.515117  | H  | -0.468189 | 2.818487  | 4.278859  |
| H | 1.965657  | 1.270195  | -2.364556 | H  | 0.482773  | 4.304559  | 4.263322  |
| H | -2.493147 | -0.913169 | 3.245674  | C  | 1.275597  | 2.734687  | 3.028919  |
| H | -3.412910 | 0.599759  | 3.307312  | C  | 2.107243  | 3.324767  | 2.020618  |
| H | -1.655840 | 0.638055  | 3.024980  | H  | 1.849422  | 4.304986  | 1.622646  |
| H | -3.985945 | -1.830753 | 1.384154  | H  | 3.174457  | 3.108904  | 2.041981  |
| H | -4.181297 | -0.925608 | -0.131177 | H  | 0.392320  | 1.485961  | 2.525392  |



|                           |           |           |           |   |           |           |           |
|---------------------------|-----------|-----------|-----------|---|-----------|-----------|-----------|
| H                         | 1.790707  | 2.112397  | 3.761560  | O | -4.370897 | -1.934530 | -1.528152 |
|                           |           |           |           | C | -3.097349 | -3.869831 | -0.299461 |
|                           |           |           |           | F | -2.558213 | -4.195217 | -1.488798 |
| <b><sup>2</sup>TS8a''</b> |           |           |           | F | -4.158404 | -4.653003 | -0.091343 |
| Ni                        | 0.092878  | 0.315313  | 1.036094  | F | -2.184631 | -4.125959 | 0.654913  |
| C                         | -0.309271 | 0.919425  | -0.751230 | C | -4.208670 | 1.499439  | -1.157985 |
| C                         | -0.165781 | 1.227221  | -2.991636 | C | -4.684625 | 2.275270  | -2.403637 |
| C                         | -1.178000 | 2.007339  | -2.539158 | C | -5.429384 | 0.838845  | -0.496011 |
| N                         | -1.255626 | 1.809681  | -1.161731 | H | -3.531308 | 0.702464  | -1.476665 |
| N                         | 0.363947  | 0.574358  | -1.881861 | H | -3.867619 | 2.766415  | -2.940633 |
| H                         | -1.839045 | 2.681210  | -3.055245 | H | -5.184171 | 1.592287  | -3.098804 |
| H                         | 0.238052  | 1.080652  | -3.979949 | H | -5.400515 | 3.054722  | -2.116631 |
| C                         | -2.057041 | 2.592895  | -0.248255 | H | -5.170961 | 0.352743  | 0.447404  |
| C                         | -1.383482 | 3.519277  | 0.581049  | H | -6.227895 | 1.566994  | -0.310781 |
| C                         | -3.454292 | 2.423434  | -0.213217 | H | -5.822790 | 0.065561  | -1.158249 |
| C                         | -2.147508 | 4.233007  | 1.508880  | C | 0.097413  | 3.841052  | 0.412405  |
| C                         | -4.168214 | 3.182141  | 0.725336  | C | 0.770287  | 4.355026  | 1.691483  |
| C                         | -3.526139 | 4.060645  | 1.588767  | C | 0.273926  | 4.853732  | -0.736432 |
| H                         | -1.660465 | 4.941219  | 2.168786  | H | 0.621038  | 2.925961  | 0.132051  |
| H                         | -5.243684 | 3.066343  | 0.785981  | H | 0.588632  | 3.684610  | 2.536979  |
| H                         | -4.101951 | 4.623646  | 2.317934  | H | 1.852166  | 4.417611  | 1.535387  |
| C                         | 1.647862  | -0.091727 | -1.879591 | H | 0.423576  | 5.358064  | 1.964319  |
| C                         | 1.713884  | -1.495638 | -1.816581 | H | -0.121479 | 4.463948  | -1.679656 |
| C                         | 2.794952  | 0.723235  | -1.918151 | H | -0.252698 | 5.787679  | -0.508719 |
| C                         | 2.989026  | -2.072803 | -1.799682 | H | 1.334287  | 5.087365  | -0.883906 |
| C                         | 4.042176  | 0.090162  | -1.921322 | C | 0.457943  | -2.350399 | -1.785157 |
| C                         | 4.141179  | -1.293875 | -1.854492 | C | 0.703946  | -3.744357 | -1.191762 |
| H                         | 3.084129  | -3.149679 | -1.733320 | C | -0.161626 | -2.467525 | -3.191114 |
| H                         | 4.946646  | 0.687913  | -1.938919 | H | -0.284298 | -1.848155 | -1.160523 |
| H                         | 5.118255  | -1.763015 | -1.812292 | H | 1.221069  | -3.687394 | -0.226461 |
| C                         | -2.301915 | -0.333024 | 3.587010  | H | -0.246640 | -4.255606 | -1.040685 |
| C                         | -1.563839 | -1.404969 | 4.105288  | H | 1.310724  | -4.368815 | -1.858093 |
| C                         | -0.752820 | -2.176278 | 3.272136  | H | -0.401696 | -1.483893 | -3.605702 |
| C                         | -0.664364 | -1.883816 | 1.904708  | H | 0.527293  | -2.971911 | -3.879652 |
| C                         | -1.388922 | -0.780441 | 1.415563  | H | -1.091027 | -3.040996 | -3.139914 |
| C                         | -2.254132 | -0.027816 | 2.227031  | C | 2.731034  | 2.243588  | -1.929030 |
| H                         | -2.936138 | 0.258114  | 4.241694  | C | 3.195583  | 2.808356  | -3.282121 |
| H                         | -1.634569 | -1.645226 | 5.161750  | C | 3.540261  | 2.847621  | -0.769300 |
| H                         | -0.206300 | -3.025903 | 3.672336  | H | 1.692809  | 2.550401  | -1.789802 |
| H                         | -0.102144 | -2.519292 | 1.231426  | H | 3.114682  | 3.901370  | -3.290437 |
| H                         | -2.862888 | 0.761680  | 1.803962  | H | 4.240143  | 2.544069  | -3.481902 |
| O                         | -2.287036 | -1.327331 | -0.337234 | H | 2.589110  | 2.414758  | -4.105002 |
| S                         | -3.615025 | -2.084666 | -0.279253 | H | 3.198253  | 2.456569  | 0.192897  |
| O                         | -4.309776 | -1.931620 | 1.004369  | H | 4.608008  | 2.622537  | -0.861461 |

|                          |           |           |           |   |           |           |           |
|--------------------------|-----------|-----------|-----------|---|-----------|-----------|-----------|
| H                        | 3.430858  | 3.937851  | -0.757807 | C | -3.584030 | -0.816138 | -1.905011 |
| C                        | 1.655543  | 0.783706  | 2.153710  | C | -0.693266 | 0.057779  | 4.791618  |
| H                        | 1.900083  | 1.804684  | 1.820638  | C | 0.528978  | 1.197643  | 2.969644  |
| C                        | 1.385831  | 0.792698  | 3.653000  | C | -0.063868 | 0.914524  | 5.699378  |
| H                        | 1.106935  | -0.205065 | 4.011401  | C | -1.619280 | -1.048801 | 5.287992  |
| H                        | 2.261633  | 1.117270  | 4.239473  | C | 0.841930  | 1.883750  | 5.277567  |
| H                        | 0.560386  | 1.468551  | 3.907698  | C | 1.147518  | 2.008157  | 3.928989  |
| C                        | 2.761145  | -0.171370 | 1.707754  | C | 0.864698  | 1.397583  | 1.497993  |
| H                        | 2.515368  | -1.197505 | 2.014792  | C | -2.240675 | -0.765842 | 6.660338  |
| H                        | 2.827796  | -0.188917 | 0.614815  | C | -0.881696 | -2.401505 | 5.292413  |
| C                        | 4.172719  | 0.181000  | 2.249754  | C | 2.246965  | 0.803991  | 1.166863  |
| H                        | 4.208696  | -0.030028 | 3.326071  | C | 0.816750  | 2.879182  | 1.085146  |
| H                        | 4.336167  | 1.260097  | 2.138379  | H | -5.888047 | -4.797282 | 2.010268  |
| C                        | 5.268437  | -0.566359 | 1.528993  | H | -7.425376 | -3.627587 | 0.478617  |
| C                        | 6.222358  | 0.116608  | 0.764984  | H | -6.696261 | -1.586602 | -0.702179 |
| C                        | 5.329049  | -1.966776 | 1.563597  | H | -0.290836 | 0.828272  | 6.755048  |
| C                        | 7.207388  | -0.571802 | 0.054556  | H | 1.291296  | 2.558706  | 5.998115  |
| H                        | 6.189541  | 1.202900  | 0.727683  | H | 1.846656  | 2.773465  | 3.611230  |
| C                        | 6.307469  | -2.661366 | 0.853870  | H | -2.508353 | -3.508424 | 2.954212  |
| H                        | 4.599219  | -2.517564 | 2.151706  | H | -3.485666 | 0.155650  | -0.002263 |
| C                        | 7.252096  | -1.966192 | 0.093892  | H | -2.454238 | -1.136808 | 4.590828  |
| H                        | 7.940119  | -0.019026 | -0.527694 | H | 0.116435  | 0.868586  | 0.899724  |
| H                        | 6.336135  | -3.746970 | 0.895885  | H | -3.181137 | -5.238431 | 4.521947  |
| H                        | 8.018169  | -2.506331 | -0.455428 | H | -4.714752 | -5.498544 | 3.691005  |
|                          |           |           |           | H | -4.411002 | -3.968077 | 4.525712  |
|                          |           |           |           | H | -1.926796 | -5.859827 | 2.437893  |
|                          |           |           |           | H | -2.188949 | -4.982508 | 0.918218  |
|                          |           |           |           | H | -3.442711 | -6.059620 | 1.538313  |
|                          |           |           |           | H | -4.914385 | 1.563714  | -1.379678 |
|                          |           |           |           | H | -5.821108 | 1.025852  | 0.045190  |
|                          |           |           |           | H | -6.124496 | 0.294057  | -1.546927 |
|                          |           |           |           | H | -3.188448 | 0.038661  | -2.465835 |
|                          |           |           |           | H | -4.305120 | -1.340410 | -2.543216 |
|                          |           |           |           | H | -2.754683 | -1.502479 | -1.701129 |
|                          |           |           |           | H | -3.003140 | -1.518927 | 6.872723  |
|                          |           |           |           | H | -2.727747 | 0.214818  | 6.677072  |
|                          |           |           |           | H | -1.496287 | -0.798398 | 7.464870  |
|                          |           |           |           | H | -1.563457 | -3.200124 | 5.605485  |
|                          |           |           |           | H | -0.035049 | -2.379090 | 5.989043  |
|                          |           |           |           | H | -0.494321 | -2.654014 | 4.299528  |
|                          |           |           |           | H | 2.470594  | 0.916394  | 0.099749  |
|                          |           |           |           | H | 2.308145  | -0.260357 | 1.417642  |
|                          |           |           |           | H | 3.031341  | 1.318195  | 1.733960  |
|                          |           |           |           | H | 0.927594  | 2.968684  | -0.001355 |
| <b><sup>2</sup>TS8a'</b> |           |           |           |   |           |           |           |
| C                        | -2.418685 | -0.632021 | 2.274502  |   |           |           |           |
| N                        | -2.598711 | -1.659232 | 1.388687  |   |           |           |           |
| C                        | -1.387544 | -2.225901 | 1.007260  |   |           |           |           |
| C                        | -3.896092 | -2.218005 | 1.092368  |   |           |           |           |
| N                        | -1.064360 | -0.598720 | 2.459505  |   |           |           |           |
| C                        | -0.420987 | -1.565520 | 1.689539  |   |           |           |           |
| C                        | -0.392493 | 0.236289  | 3.423172  |   |           |           |           |
| C                        | -4.272009 | -3.404539 | 1.752476  |   |           |           |           |
| C                        | -4.739408 | -1.547317 | 0.189085  |   |           |           |           |
| C                        | -5.557244 | -3.897376 | 1.504330  |   |           |           |           |
| C                        | -3.309710 | -4.183803 | 2.640721  |   |           |           |           |
| C                        | -6.424917 | -3.237401 | 0.641394  |   |           |           |           |
| C                        | -6.015603 | -2.080784 | -0.017712 |   |           |           |           |
| C                        | -4.250366 | -0.343311 | -0.598767 |   |           |           |           |
| C                        | -3.951252 | -4.745948 | 3.916985  |   |           |           |           |
| C                        | -2.675102 | -5.334826 | 1.833294  |   |           |           |           |
| C                        | -5.347990 | 0.689407  | -0.882242 |   |           |           |           |

|    |           |           |          |                         |           |           |           |
|----|-----------|-----------|----------|-------------------------|-----------|-----------|-----------|
| H  | 1.628411  | 3.452009  | 1.546448 | F                       | -8.048361 | -0.044498 | 5.507563  |
| H  | -0.130069 | 3.341420  | 1.372640 | F                       | -7.873992 | -1.671493 | 6.938774  |
| H  | -1.333684 | -3.041717 | 0.306465 | F                       | -6.586255 | 0.075892  | 7.118093  |
| H  | 0.648452  | -1.690488 | 1.710962 |                         |           |           |           |
| H  | -1.961584 | 1.859112  | 1.017210 |                         |           |           |           |
| Ni | -3.866093 | 0.485007  | 3.015354 | <b><sup>2</sup>TS8a</b> |           |           |           |
| C  | 0.868873  | 5.566394  | 5.077904 | C                       | 0.442925  | 0.579817  | 4.540838  |
| C  | -0.190089 | 5.270095  | 4.218679 | C                       | 0.745487  | -0.510069 | 5.283013  |
| C  | -1.419891 | 4.819853  | 4.714434 | H                       | 0.076293  | 1.554362  | 4.814994  |
| C  | -1.560200 | 4.671763  | 6.101048 | H                       | 0.685043  | -0.694042 | 6.342590  |
| C  | -0.505276 | 4.962105  | 6.965614 | C                       | 1.196927  | -1.030424 | 3.104116  |
| C  | 0.716080  | 5.411391  | 6.456850 | N                       | 1.210462  | -1.476491 | 4.397898  |
| H  | 1.812429  | 5.921062  | 4.670800 | N                       | 0.722664  | 0.247146  | 3.217572  |
| H  | -0.062622 | 5.383781  | 3.144772 | C                       | 0.525863  | 1.176671  | 2.137173  |
| H  | -2.508066 | 4.321882  | 6.503905 | C                       | 1.653406  | 1.733617  | 1.497804  |
| H  | -0.636911 | 4.842662  | 8.037890 | C                       | -0.793762 | 1.521416  | 1.794379  |
| H  | 1.536878  | 5.645087  | 7.129425 | C                       | 1.410636  | 2.660022  | 0.478548  |
| C  | -2.527990 | 4.405765  | 3.778366 | C                       | -0.974884 | 2.474321  | 0.785044  |
| H  | -3.499251 | 4.775851  | 4.131062 | C                       | 0.114378  | 3.033530  | 0.129672  |
| H  | -2.358772 | 4.848208  | 2.789915 | H                       | 2.245032  | 3.103865  | -0.049779 |
| C  | -2.589625 | 2.861847  | 3.660457 | H                       | -1.981010 | 2.763119  | 0.499298  |
| H  | -2.923127 | 2.476129  | 4.633016 | H                       | -0.042631 | 3.761656  | -0.661032 |
| H  | -1.569771 | 2.496272  | 3.532202 | C                       | 1.651324  | -2.778740 | 4.832548  |
| C  | -3.466706 | 2.333901  | 2.524834 | C                       | 0.687771  | -3.787644 | 4.989927  |
| H  | -4.437567 | 2.845107  | 2.535441 | C                       | 3.022951  | -2.978674 | 5.076592  |
| C  | -2.828350 | 2.515572  | 1.153653 | C                       | 1.132920  | -5.037145 | 5.433432  |
| H  | -2.477810 | 3.548132  | 0.989214 | C                       | 3.416435  | -4.252580 | 5.498663  |
| H  | -3.539455 | 2.298401  | 0.352425 | C                       | 2.481284  | -5.269219 | 5.679962  |
| C  | -5.559775 | 0.910758  | 3.862956 | H                       | 0.419040  | -5.843949 | 5.556437  |
| C  | -6.482428 | 0.589381  | 2.828826 | H                       | 4.464399  | -4.456019 | 5.686338  |
| C  | -5.790303 | 2.025973  | 4.713032 | H                       | 2.810368  | -6.252303 | 6.004603  |
| C  | -7.443151 | 1.536995  | 2.489364 | Ni                      | 1.716872  | -2.071469 | 1.471624  |
| H  | -6.410577 | -0.354996 | 2.302031 | C                       | -2.009350 | 0.897084  | 2.467041  |
| C  | -6.764718 | 2.938119  | 4.354306 | H                       | -1.674852 | 0.020054  | 3.029266  |
| H  | -5.147224 | 2.184170  | 5.571758 | C                       | -3.052072 | 0.413084  | 1.444973  |
| C  | -7.586441 | 2.715596  | 3.231777 | H                       | -3.837093 | -0.152204 | 1.958530  |
| H  | -8.106167 | 1.339223  | 1.651016 | H                       | -3.533494 | 1.251611  | 0.929799  |
| H  | -6.901467 | 3.835124  | 4.952990 | H                       | -2.601381 | -0.235807 | 0.690807  |
| H  | -8.357282 | 3.434064  | 2.972157 | C                       | -2.663009 | 1.880222  | 3.455937  |
| O  | -5.000154 | -0.408555 | 4.750777 | H                       | -3.520298 | 1.411210  | 3.951973  |
| S  | -5.931406 | -1.612298 | 5.196015 | H                       | -1.963706 | 2.211434  | 4.229990  |
| O  | -6.657918 | -2.201877 | 4.077267 | H                       | -3.022194 | 2.773177  | 2.931412  |
| O  | -5.164914 | -2.455593 | 6.111570 | C                       | 3.079129  | 1.369648  | 1.908175  |
| C  | -7.198719 | -0.742112 | 6.258698 | H                       | 3.146025  | 0.277038  | 1.955645  |

|   |           |           |           |                         |           |           |           |
|---|-----------|-----------|-----------|-------------------------|-----------|-----------|-----------|
| C | 4.137358  | 1.836970  | 0.902475  | H                       | -0.767902 | -3.587589 | 1.521721  |
| H | 5.115953  | 1.455233  | 1.205189  | H                       | -1.362431 | -1.943563 | 1.541857  |
| H | 3.934813  | 1.459362  | -0.103515 | C                       | 0.246024  | -2.307564 | 0.126352  |
| H | 4.203795  | 2.931160  | 0.864292  | H                       | 0.528390  | -3.120752 | -0.555222 |
| C | 3.426334  | 1.921974  | 3.305294  | C                       | 0.092806  | -1.028003 | -0.689812 |
| H | 4.448370  | 1.632407  | 3.575784  | H                       | -0.615849 | -1.145627 | -1.526357 |
| H | 3.373121  | 3.017353  | 3.308591  | H                       | 1.049121  | -0.717431 | -1.131510 |
| H | 2.758170  | 1.546941  | 4.083362  | C                       | 3.065713  | -2.828762 | 0.303470  |
| C | -0.781418 | -3.548397 | 4.674461  | C                       | 4.011557  | -2.594978 | 1.355726  |
| H | -0.833492 | -2.735214 | 3.943883  | C                       | 3.311659  | -2.260151 | -0.982181 |
| C | -1.465775 | -4.767242 | 4.040517  | C                       | 5.107117  | -1.742565 | 1.120109  |
| H | -1.598239 | -5.580123 | 4.764505  | H                       | 3.942958  | -3.160904 | 2.276650  |
| H | -2.458592 | -4.489049 | 3.677211  | C                       | 4.388290  | -1.418855 | -1.164740 |
| H | -0.892686 | -5.151270 | 3.193752  | H                       | 2.623031  | -2.481608 | -1.790374 |
| C | -1.552760 | -3.107171 | 5.933024  | C                       | 5.302313  | -1.154357 | -0.118968 |
| H | -1.147722 | -2.185073 | 6.361426  | H                       | 5.824673  | -1.581044 | 1.919733  |
| H | -2.606865 | -2.932775 | 5.688742  | H                       | 4.537209  | -0.956249 | -2.137459 |
| H | -1.507552 | -3.885114 | 6.704375  | H                       | 6.157914  | -0.510712 | -0.295403 |
| C | 4.037274  | -1.851276 | 4.915214  | O                       | 2.709018  | -4.431040 | 0.084359  |
| H | 3.732284  | -1.254326 | 4.049125  | S                       | 1.795249  | -5.114468 | 1.148651  |
| C | 4.046907  | -0.929255 | 6.150593  | O                       | 0.705119  | -5.883378 | 0.562034  |
| H | 3.072848  | -0.467008 | 6.325407  | O                       | 1.510042  | -4.177784 | 2.258463  |
| H | 4.322087  | -1.495892 | 7.047876  | C                       | 2.973217  | -6.340118 | 1.906971  |
| H | 4.778862  | -0.124068 | 6.017808  | F                       | 2.335528  | -7.000380 | 2.876515  |
| C | 5.465336  | -2.350512 | 4.651545  | F                       | 3.398547  | -7.201975 | 0.985343  |
| H | 5.900162  | -2.817020 | 5.542887  | F                       | 4.021032  | -5.696974 | 2.430314  |
| H | 5.506571  | -3.079586 | 3.837270  |                         |           |           |           |
| H | 6.107131  | -1.503586 | 4.386230  |                         |           |           |           |
| H | -0.267093 | -0.195198 | -0.079077 |                         |           |           |           |
| C | -5.178479 | -4.095412 | 2.149515  | <b><sup>2</sup>TS8b</b> |           |           |           |
| C | -4.289755 | -3.362545 | 1.360183  | C                       | 6.072807  | -0.908847 | 5.963547  |
| C | -3.201281 | -3.983034 | 0.735175  | C                       | 4.844487  | -0.529616 | 6.395111  |
| C | -3.025514 | -5.362248 | 0.918087  | H                       | 7.052155  | -0.780085 | 6.393532  |
| C | -3.913810 | -6.099609 | 1.699603  | H                       | 4.524363  | -0.006607 | 7.281726  |
| C | -4.993883 | -5.468391 | 2.321476  | C                       | 4.564803  | -1.624840 | 4.413587  |
| H | -6.018549 | -3.595058 | 2.624779  | N                       | 3.938551  | -0.979974 | 5.438562  |
| H | -4.443483 | -2.295387 | 1.221004  | N                       | 5.884445  | -1.572745 | 4.754184  |
| H | -2.168833 | -5.850127 | 0.459599  | C                       | 6.939109  | -2.219613 | 4.012839  |
| H | -3.759988 | -7.167765 | 1.828391  | C                       | 7.033105  | -3.624012 | 4.083484  |
| H | -5.685936 | -6.041494 | 2.932458  | C                       | 7.824860  | -1.430182 | 3.261911  |
| C | -2.179004 | -3.191132 | -0.039895 | C                       | 8.059123  | -4.232765 | 3.357479  |
| H | -1.764040 | -3.813878 | -0.841933 | C                       | 8.836564  | -2.092003 | 2.555948  |
| H | -2.644897 | -2.321501 | -0.519095 | C                       | 8.949822  | -3.476921 | 2.598573  |
| C | -1.009073 | -2.741797 | 0.874289  | H                       | 8.156598  | -5.312005 | 3.372202  |
|   |           |           |           | H                       | 9.536812  | -1.514649 | 1.961530  |

|   |           |           |          |    |           |           |           |
|---|-----------|-----------|----------|----|-----------|-----------|-----------|
| H | 9.734561  | -3.973105 | 2.034666 | H  | 9.808849  | 0.430313  | 3.864162  |
| C | 2.509266  | -0.946588 | 5.602356 | H  | 8.718615  | 1.787116  | 4.207498  |
| C | 1.759361  | 0.015753  | 4.903230 | C  | 7.908840  | 0.677360  | 1.828949  |
| C | 1.928888  | -1.904795 | 6.449179 | H  | 8.922012  | 0.523949  | 1.441272  |
| C | 0.376404  | 0.018498  | 5.107381 | H  | 7.200065  | 0.229293  | 1.128849  |
| C | 0.540671  | -1.856424 | 6.621721 | H  | 7.730396  | 1.758348  | 1.855014  |
| C | -0.225883 | -0.899774 | 5.965100 | Ni | 3.729536  | -2.113941 | 2.665935  |
| H | -0.239009 | 0.740708  | 4.583634 | H  | 2.871214  | 0.106862  | 0.669246  |
| H | 0.057511  | -2.582989 | 7.267992 | H  | 5.072224  | -0.084613 | 2.201018  |
| H | -1.302727 | -0.878053 | 6.107524 | C  | 5.238172  | -2.902580 | -4.765335 |
| C | 2.750504  | -2.993956 | 7.125713 | C  | 5.323593  | -2.499241 | -3.432522 |
| H | 3.809513  | -2.779156 | 6.965118 | C  | 5.320442  | -1.138558 | -3.095864 |
| C | 2.471286  | -4.364066 | 6.483957 | C  | 5.229105  | -0.196146 | -4.127943 |
| H | 1.422065  | -4.655510 | 6.610487 | C  | 5.144271  | -0.595957 | -5.462242 |
| H | 2.691167  | -4.340072 | 5.413317 | C  | 5.148237  | -1.953611 | -5.785843 |
| H | 3.095207  | -5.137190 | 6.947197 | H  | 5.244863  | -3.962307 | -5.007830 |
| C | 2.522394  | -3.029725 | 8.645017 | H  | 5.394671  | -3.238477 | -2.640770 |
| H | 2.737170  | -2.056920 | 9.100917 | H  | 5.227061  | 0.863402  | -3.880053 |
| H | 1.488839  | -3.294613 | 8.894158 | H  | 5.078603  | 0.152138  | -6.248305 |
| H | 3.176446  | -3.776962 | 9.108204 | H  | 5.084554  | -2.269086 | -6.823883 |
| C | 2.436579  | 1.029598  | 3.990949 | C  | 5.358720  | -0.698270 | -1.651181 |
| H | 3.283544  | 0.530991  | 3.510394 | H  | 6.013150  | -1.363704 | -1.078699 |
| C | 1.525289  | 1.538977  | 2.867667 | H  | 5.786142  | 0.311847  | -1.585614 |
| H | 2.111414  | 2.139742  | 2.165057 | C  | 3.956017  | -0.687228 | -1.011969 |
| H | 1.079045  | 0.707594  | 2.314470 | H  | 3.588846  | -1.717891 | -0.965389 |
| H | 0.719411  | 2.175864  | 3.251379 | H  | 3.277154  | -0.140408 | -1.681193 |
| C | 2.997801  | 2.205815  | 4.812474 | C  | 3.921757  | -0.039844 | 0.379212  |
| H | 2.189473  | 2.733068  | 5.332947 | H  | 4.333081  | 0.979705  | 0.279079  |
| H | 3.719748  | 1.866627  | 5.561922 | C  | 4.668584  | -0.799841 | 1.474322  |
| H | 3.504505  | 2.921513  | 4.155075 | H  | 5.524713  | -1.356460 | 1.076663  |
| C | 6.074000  | -4.444787 | 4.938055 | C  | 2.301633  | -2.828784 | 1.575569  |
| H | 5.081873  | -3.996607 | 4.836969 | C  | 1.316497  | -2.020219 | 0.943667  |
| C | 6.474039  | -4.380008 | 6.425335 | C  | 1.940759  | -3.579477 | 2.742327  |
| H | 7.468800  | -4.816398 | 6.574346 | C  | 0.095511  | -1.833234 | 1.560563  |
| H | 6.495790  | -3.353103 | 6.800929 | H  | 1.550731  | -1.532808 | 0.005915  |
| H | 5.760945  | -4.946507 | 7.036102 | C  | 0.679187  | -3.365987 | 3.332769  |
| C | 5.947964  | -5.907642 | 4.495828 | H  | 2.583330  | -4.375442 | 3.101162  |
| H | 5.728536  | -5.986146 | 3.429741 | C  | -0.230340 | -2.488845 | 2.768602  |
| H | 6.860963  | -6.477422 | 4.706067 | H  | -0.628227 | -1.164910 | 1.100202  |
| H | 5.133760  | -6.386637 | 5.051202 | H  | 0.420393  | -3.921865 | 4.228704  |
| C | 7.745517  | 0.089766  | 3.240087 | H  | -1.198088 | -2.327567 | 3.231312  |
| H | 6.755013  | 0.381441  | 3.602847 | O  | 3.043938  | -3.798188 | 0.358635  |
| C | 8.796487  | 0.693904  | 4.191415 | S  | 4.486179  | -4.285232 | 0.650974  |
| H | 8.677035  | 0.329450  | 5.217242 | O  | 5.427391  | -4.019621 | -0.430063 |

|                          |           |           |           |    |          |           |           |
|--------------------------|-----------|-----------|-----------|----|----------|-----------|-----------|
| O                        | 4.883638  | -3.954389 | 2.042234  | H  | 3.330280 | 0.924318  | 4.415570  |
| C                        | 4.232617  | -6.126674 | 0.699819  | C  | 1.407950 | 1.687721  | 3.901179  |
| F                        | 3.795325  | -6.566729 | -0.477078 | H  | 1.847992 | 2.530004  | 3.356082  |
| F                        | 5.398058  | -6.716316 | 0.991488  | H  | 1.146171 | 0.907911  | 3.179467  |
| F                        | 3.342724  | -6.432631 | 1.649830  | H  | 0.482241 | 2.043579  | 4.367524  |
| <b><sup>2</sup>TS8b'</b> |           |           |           | C  | 2.731264 | 2.225614  | 6.006685  |
| C                        | 6.248734  | -1.047856 | 5.358036  | H  | 1.837935 | 2.496472  | 6.581525  |
| C                        | 5.121512  | -0.967653 | 6.107512  | H  | 3.487225 | 1.863218  | 6.712506  |
| H                        | 7.289325  | -0.948769 | 5.617989  | H  | 3.116308 | 3.134720  | 5.531017  |
| H                        | 4.969127  | -0.764831 | 7.154803  | C  | 6.140737 | -4.023855 | 2.974532  |
| C                        | 4.486341  | -1.417149 | 3.965663  | H  | 5.091630 | -3.717949 | 3.045706  |
| N                        | 4.058689  | -1.210122 | 5.243605  | C  | 6.608565 | -4.428434 | 4.386917  |
| N                        | 5.842682  | -1.324122 | 4.056061  | H  | 7.657047 | -4.748323 | 4.363888  |
| C                        | 6.768054  | -1.527264 | 2.967362  | H  | 6.519674 | -3.613722 | 5.110419  |
| C                        | 6.934396  | -2.830289 | 2.446798  | H  | 6.007526 | -5.269309 | 4.752193  |
| C                        | 7.488264  | -0.417381 | 2.494222  | C  | 6.181800 | -5.244004 | 2.047231  |
| C                        | 7.878020  | -2.989450 | 1.428233  | H  | 5.859509 | -4.998964 | 1.033578  |
| C                        | 8.437062  | -0.643413 | 1.489020  | H  | 7.186890 | -5.679491 | 1.999871  |
| C                        | 8.631034  | -1.913624 | 0.962648  | H  | 5.507538 | -6.013499 | 2.430828  |
| H                        | 8.013759  | -3.960279 | 0.970429  | C  | 7.271237 | 0.993261  | 3.027021  |
| H                        | 9.011414  | 0.192204  | 1.102244  | H  | 6.357532 | 0.993501  | 3.629798  |
| H                        | 9.343867  | -2.069101 | 0.159639  | C  | 8.439877 | 1.426804  | 3.931123  |
| C                        | 2.687638  | -1.273612 | 5.679965  | H  | 8.581716 | 0.740633  | 4.772749  |
| C                        | 1.898417  | -0.117150 | 5.596956  | H  | 9.377983 | 1.450965  | 3.364992  |
| C                        | 2.207423  | -2.494226 | 6.191955  | H  | 8.263007 | 2.429790  | 4.336016  |
| C                        | 0.605914  | -0.179044 | 6.130917  | C  | 7.066746 | 2.016565  | 1.896006  |
| C                        | 0.908214  | -2.504413 | 6.710230  | H  | 7.973202 | 2.139656  | 1.293520  |
| C                        | 0.121942  | -1.353160 | 6.698909  | H  | 6.253733 | 1.716549  | 1.229547  |
| H                        | -0.028150 | 0.700797  | 6.092828  | H  | 6.818929 | 2.995972  | 2.320714  |
| H                        | 0.504116  | -3.423481 | 7.120411  | Ni | 3.345882 | -1.618630 | 2.362396  |
| H                        | -0.881696 | -1.380846 | 7.113803  | H  | 2.478737 | 0.235840  | -0.323901 |
| C                        | 3.056787  | -3.758770 | 6.176544  | H  | 3.218048 | 0.775325  | 1.936908  |
| H                        | 3.781253  | -3.660260 | 5.361073  | C  | 6.402832 | -4.612634 | -1.984124 |
| C                        | 2.230779  | -5.026071 | 5.903150  | C  | 5.796565 | -3.522996 | -1.362021 |
| H                        | 1.597169  | -5.286069 | 6.758435  | C  | 6.312838 | -2.228046 | -1.509094 |
| H                        | 1.589610  | -4.919102 | 5.024733  | C  | 7.447718 | -2.052959 | -2.307852 |
| H                        | 2.902942  | -5.871470 | 5.725192  | C  | 8.063502 | -3.141628 | -2.930915 |
| C                        | 3.847667  | -3.920125 | 7.488353  | C  | 7.544962 | -4.427199 | -2.768008 |
| H                        | 4.509799  | -3.069354 | 7.671143  | H  | 5.973793 | -5.601410 | -1.848974 |
| H                        | 3.163654  | -4.008237 | 8.340489  | H  | 4.917823 | -3.688043 | -0.750615 |
| H                        | 4.464928  | -4.824672 | 7.450901  | H  | 7.859367 | -1.053760 | -2.434249 |
| C                        | 2.404410  | 1.159811  | 4.946815  | H  | 8.946155 | -2.983493 | -3.545801 |
|                          |           |           |           | H  | 8.021552 | -5.274935 | -3.253038 |
|                          |           |           |           | C  | 5.688174 | -1.072847 | -0.763597 |

|                           |           |           |           |   |           |           |           |
|---------------------------|-----------|-----------|-----------|---|-----------|-----------|-----------|
| H                         | 5.856085  | -1.235693 | 0.305787  | H | -2.492009 | 4.602230  | 2.482161  |
| H                         | 6.210782  | -0.140534 | -1.016491 | H | -5.537042 | 3.106691  | -0.119097 |
| C                         | 4.180656  | -0.903636 | -0.996701 | H | -4.870331 | 4.434588  | 1.848600  |
| H                         | 3.685375  | -1.854133 | -0.778656 | C | 1.751241  | -0.211124 | -0.847843 |
| H                         | 3.998333  | -0.684658 | -2.057428 | C | 1.765223  | -1.616761 | -0.899603 |
| C                         | 3.556137  | 0.192540  | -0.122018 | C | 2.872478  | 0.552323  | -0.469059 |
| H                         | 3.956312  | 1.170432  | -0.444604 | C | 2.965789  | -2.253680 | -0.563424 |
| C                         | 3.789274  | 0.024138  | 1.374041  | C | 4.048514  | -0.137157 | -0.154087 |
| H                         | 4.845638  | 0.164851  | 1.622814  | C | 4.095109  | -1.525848 | -0.197912 |
| C                         | 1.871533  | -2.278826 | 1.390481  | H | 3.016819  | -3.335507 | -0.585993 |
| C                         | 0.991324  | -1.808441 | 0.394969  | H | 4.932070  | 0.420469  | 0.139081  |
| C                         | 1.414046  | -2.547783 | 2.705089  | H | 5.013844  | -2.044963 | 0.059377  |
| C                         | -0.262569 | -1.387279 | 0.790224  | C | -3.789930 | -0.649020 | 3.105294  |
| H                         | 1.321872  | -1.729721 | -0.632924 | C | -3.331226 | -1.833432 | 3.694199  |
| C                         | 0.121699  | -2.111391 | 3.073741  | C | -2.310958 | -2.577661 | 3.098742  |
| H                         | 1.971834  | -3.190902 | 3.379205  | C | -1.725218 | -2.137814 | 1.905562  |
| C                         | -0.695868 | -1.513388 | 2.132842  | C | -2.157956 | -0.910656 | 1.384421  |
| H                         | -0.928936 | -0.949216 | 0.052044  | C | -3.230285 | -0.186211 | 1.912996  |
| H                         | -0.225934 | -2.294563 | 4.084577  | H | -4.601231 | -0.090577 | 3.563763  |
| H                         | -1.695211 | -1.188656 | 2.405859  | H | -3.793971 | -2.191662 | 4.608899  |
| O                         | 3.008401  | -3.617869 | 0.788752  | H | -1.993373 | -3.521162 | 3.533808  |
| S                         | 2.470470  | -5.016849 | 0.374316  | H | -0.991132 | -2.740665 | 1.384931  |
| O                         | 1.158255  | -4.957736 | -0.262472 | H | -3.603492 | 0.703308  | 1.421289  |
| O                         | 3.555497  | -5.795032 | -0.224156 | O | -2.459470 | -1.318442 | -0.814896 |
| C                         | 2.179003  | -5.834722 | 2.033147  | S | -3.761812 | -1.987374 | -1.197531 |
| F                         | 0.987707  | -5.492490 | 2.540259  | O | -4.797142 | -1.889979 | -0.156783 |
| F                         | 2.226014  | -7.158999 | 1.898569  | O | -4.143378 | -1.721838 | -2.592496 |
| F                         | 3.129707  | -5.460619 | 2.917648  | C | -3.331144 | -3.794682 | -1.208726 |
| <b><sup>2</sup>TS8b''</b> |           |           |           | F | -2.459375 | -4.077249 | -2.197495 |
| Ni                        | -0.555487 | 0.069260  | 1.490259  | F | -4.427425 | -4.534137 | -1.397708 |
| C                         | -0.429282 | 0.805215  | -0.281529 | F | -2.764270 | -4.170086 | -0.044283 |
| C                         | 0.375974  | 1.253330  | -2.347339 | C | -4.009668 | 1.660744  | -1.814512 |
| C                         | -0.707922 | 2.044447  | -2.152388 | C | -4.065411 | 2.587287  | -3.047089 |
| N                         | -1.192048 | 1.760931  | -0.877290 | C | -5.390510 | 1.011003  | -1.625130 |
| N                         | 0.542374  | 0.508408  | -1.183287 | H | -3.290782 | 0.859380  | -2.005142 |
| H                         | -1.175403 | 2.775569  | -2.788023 | H | -3.115651 | 3.092267  | -3.250042 |
| H                         | 1.047250  | 1.153081  | -3.184144 | H | -4.338069 | 2.007674  | -3.935224 |
| C                         | -2.207423 | 2.514711  | -0.177447 | H | -4.821963 | 3.367914  | -2.903253 |
| C                         | -1.789215 | 3.315043  | 0.911005  | H | -5.439441 | 0.417991  | -0.709546 |
| C                         | -3.551581 | 2.438580  | -0.589895 | H | -6.188491 | 1.762958  | -1.607245 |
| C                         | -2.776707 | 3.990301  | 1.634204  | H | -5.582482 | 0.329821  | -2.456177 |
| C                         | -4.492297 | 3.154984  | 0.163637  | C | -0.318645 | 3.564146  | 1.230522  |
| C                         | -4.117714 | 3.904030  | 1.272206  | C | -0.044029 | 3.846597  | 2.713032  |
|                           |           |           |           | C | 0.205441  | 4.712222  | 0.345821  |

|   |           |           |           |                         |           |           |           |
|---|-----------|-----------|-----------|-------------------------|-----------|-----------|-----------|
| H | 0.251283  | 2.669330  | 0.977915  | C                       | 6.425304  | 2.120259  | 4.657314  |
| H | -0.467519 | 3.065502  | 3.351855  | H                       | 4.386031  | 2.349574  | 4.004016  |
| H | 1.036886  | 3.876112  | 2.885648  | C                       | 7.351011  | 1.292666  | 5.296967  |
| H | -0.449038 | 4.813359  | 3.031644  | H                       | 7.655039  | -0.601936 | 6.279646  |
| H | 0.095163  | 4.478044  | -0.718162 | H                       | 6.731509  | 3.094786  | 4.285918  |
| H | -0.347650 | 5.636782  | 0.547168  | H                       | 8.379782  | 1.617963  | 5.423769  |
| H | 1.266604  | 4.898587  | 0.545389  |                         |           |           |           |
| C | 0.541987  | -2.409833 | -1.327205 | <b><sup>2</sup>TS9a</b> |           |           |           |
| C | 0.547015  | -3.846481 | -0.787221 | C                       | 0.821943  | 0.611983  | 4.567203  |
| C | 0.403771  | -2.410644 | -2.862046 | C                       | 1.002962  | -0.523640 | 5.281599  |
| H | -0.349721 | -1.912259 | -0.938619 | H                       | 0.658878  | 1.634622  | 4.866813  |
| H | 0.729249  | -3.870545 | 0.294067  | H                       | 1.037403  | -0.708531 | 6.342852  |
| H | -0.417264 | -4.315753 | -0.981519 | C                       | 1.115595  | -1.099026 | 3.073742  |
| H | 1.315769  | -4.462238 | -1.269027 | N                       | 1.174558  | -1.550489 | 4.360236  |
| H | 0.338846  | -1.392686 | -3.258072 | N                       | 0.888845  | 0.242029  | 3.227395  |
| H | 1.261476  | -2.908101 | -3.331240 | C                       | 0.773349  | 1.195910  | 2.159201  |
| H | -0.510415 | -2.935864 | -3.149287 | C                       | 1.895582  | 1.987719  | 1.858985  |
| C | 2.861564  | 2.074785  | -0.428330 | C                       | -0.459574 | 1.320057  | 1.493574  |
| C | 3.661451  | 2.651588  | -1.610481 | C                       | 1.754362  | 2.935332  | 0.839666  |
| C | 3.384469  | 2.630343  | 0.906149  | C                       | -0.547586 | 2.286135  | 0.484954  |
| H | 1.830721  | 2.418052  | -0.536354 | C                       | 0.547929  | 3.083924  | 0.161594  |
| H | 3.614859  | 3.746496  | -1.607234 | H                       | 2.597565  | 3.560503  | 0.569522  |
| H | 4.714979  | 2.355855  | -1.552084 | H                       | -1.477914 | 2.415731  | -0.056185 |
| H | 3.268476  | 2.296002  | -2.568830 | H                       | 0.459644  | 3.826288  | -0.626816 |
| H | 2.794899  | 2.255750  | 1.746974  | C                       | 1.409819  | -2.903267 | 4.794907  |
| H | 4.429837  | 2.357792  | 1.084680  | C                       | 0.317485  | -3.779300 | 4.871730  |
| H | 3.324649  | 3.724357  | 0.905191  | C                       | 2.712284  | -3.255348 | 5.168097  |
| C | 0.719133  | 0.305453  | 2.956027  | C                       | 0.562347  | -5.060824 | 5.371448  |
| H | 1.263038  | 1.231354  | 2.725291  | C                       | 2.908533  | -4.550492 | 5.658734  |
| C | 1.646316  | -0.914257 | 2.936598  | C                       | 1.845044  | -5.442244 | 5.763067  |
| H | 1.237754  | -1.695647 | 3.592001  | H                       | -0.253231 | -5.771997 | 5.446262  |
| H | 1.686108  | -1.361138 | 1.930296  | H                       | 3.906212  | -4.867077 | 5.946860  |
| H | 0.210939  | 0.446187  | 3.917173  | H                       | 2.016221  | -6.445392 | 6.144043  |
| C | 3.102259  | -0.601944 | 3.325066  | Ni                      | 1.276838  | -2.161448 | 1.353655  |
| H | 3.718066  | -1.507152 | 3.235420  | C                       | -1.654493 | 0.453209  | 1.873072  |
| H | 3.507913  | 0.110673  | 2.598141  | H                       | -1.273722 | -0.545768 | 2.111039  |
| C | 3.266096  | -0.012254 | 4.735693  | C                       | -2.675176 | 0.295367  | 0.738708  |
| H | 2.976353  | -0.761027 | 5.484112  | H                       | -3.414976 | -0.461439 | 1.017464  |
| H | 2.575593  | 0.832252  | 4.849039  | H                       | -3.217426 | 1.228336  | 0.546636  |
| C | 4.682207  | 0.451871  | 4.976549  | H                       | -2.200575 | -0.018915 | -0.196888 |
| C | 5.619963  | -0.367045 | 5.615814  | C                       | -2.357285 | 0.993490  | 3.133793  |
| C | 5.104914  | 1.700969  | 4.500304  | H                       | -3.203650 | 0.350043  | 3.400358  |
| C | 6.943282  | 0.047316  | 5.776738  | H                       | -1.681290 | 1.028847  | 3.991715  |
| H | 5.307487  | -1.338619 | 5.991836  | H                       | -2.739702 | 2.005581  | 2.955856  |



|   |           |           |           |                         |           |           |           |
|---|-----------|-----------|-----------|-------------------------|-----------|-----------|-----------|
| C | 3.215955  | 1.798474  | 2.597087  | H                       | -2.024910 | -3.654288 | -1.580444 |
| H | 2.979666  | 1.530526  | 3.632906  | C                       | -0.788813 | -3.017176 | 0.095996  |
| C | 4.028110  | 0.633692  | 1.999325  | H                       | -0.693285 | -3.336064 | 1.141142  |
| H | 4.946254  | 0.484200  | 2.579591  | H                       | -1.302097 | -2.048838 | 0.105493  |
| H | 3.464092  | -0.300338 | 2.005224  | C                       | 0.588580  | -2.883851 | -0.577172 |
| H | 4.303346  | 0.843639  | 0.961868  | H                       | 1.132775  | -3.824592 | -0.509575 |
| C | 4.066282  | 3.075344  | 2.648187  | C                       | 0.448387  | -2.486094 | -2.045113 |
| H | 4.924573  | 2.918824  | 3.310170  | H                       | -0.131445 | -3.248263 | -2.581514 |
| H | 4.464729  | 3.336730  | 1.661325  | H                       | 1.417672  | -2.397723 | -2.538965 |
| H | 3.495757  | 3.932218  | 3.023983  | C                       | 2.102423  | -1.509843 | -0.247034 |
| C | -1.075087 | -3.338544 | 4.444462  | C                       | 3.371769  | -2.062821 | -0.506288 |
| H | -0.951617 | -2.586239 | 3.658641  | C                       | 1.817189  | -0.225077 | -0.742372 |
| C | -1.911712 | -4.473932 | 3.845721  | C                       | 4.335285  | -1.331625 | -1.200077 |
| H | -2.203788 | -5.210472 | 4.603808  | H                       | 3.603121  | -3.057952 | -0.141745 |
| H | -2.831751 | -4.074217 | 3.409356  | C                       | 2.783732  | 0.499235  | -1.439011 |
| H | -1.363994 | -4.995822 | 3.058202  | H                       | 0.837011  | 0.213227  | -0.590477 |
| C | -1.826997 | -2.672369 | 5.612183  | C                       | 4.047414  | -0.047765 | -1.674596 |
| H | -1.287137 | -1.802184 | 5.998554  | H                       | 5.315031  | -1.769624 | -1.375498 |
| H | -2.819261 | -2.337725 | 5.286611  | H                       | 2.543151  | 1.496781  | -1.796756 |
| H | -1.961190 | -3.381921 | 6.437363  | H                       | 4.795794  | 0.514229  | -2.226499 |
| C | 3.882566  | -2.299854 | 4.992415  | O                       | 2.045742  | -3.756630 | 2.063281  |
| H | 3.481018  | -1.307941 | 4.765363  | C                       | 2.275888  | -4.985436 | 1.459350  |
| C | 4.725582  | -2.166479 | 6.269692  | H                       | 2.472741  | -4.879950 | 0.369437  |
| H | 4.114646  | -1.849349 | 7.122989  | C                       | 1.062308  | -5.920150 | 1.609065  |
| H | 5.207026  | -3.113839 | 6.537054  | H                       | 1.226154  | -6.889969 | 1.119767  |
| H | 5.519712  | -1.425442 | 6.122441  | H                       | 0.865569  | -6.092379 | 2.673024  |
| C | 4.736493  | -2.723124 | 3.784678  | H                       | 0.167750  | -5.463721 | 1.173276  |
| H | 5.229040  | -3.683691 | 3.977041  | C                       | 3.527660  | -5.648875 | 2.054618  |
| H | 4.101380  | -2.843139 | 2.903265  | H                       | 3.400171  | -5.774971 | 3.135216  |
| H | 5.513199  | -1.974484 | 3.586324  | H                       | 3.715622  | -6.632200 | 1.603640  |
| H | -0.074289 | -1.529277 | -2.156917 | H                       | 4.407579  | -5.018862 | 1.888918  |
| C | -5.013647 | -3.791568 | 1.264422  |                         |           |           |           |
| C | -3.914595 | -3.474609 | 0.466804  |                         |           |           |           |
| C | -2.908880 | -4.418799 | 0.216788  |                         |           |           |           |
| C | -3.040053 | -5.694000 | 0.778027  | <b><sup>2</sup>TS9b</b> |           |           |           |
| C | -4.141720 | -6.019412 | 1.570948  | C                       | 5.977625  | -1.399283 | 6.245894  |
| C | -5.130684 | -5.067834 | 1.821079  | C                       | 4.709046  | -1.172463 | 6.667528  |
| H | -5.783523 | -3.045907 | 1.445062  | H                       | 6.903549  | -1.511355 | 6.786503  |
| H | -3.838365 | -2.485882 | 0.021858  | H                       | 4.293760  | -1.046346 | 7.654296  |
| H | -2.266066 | -6.435444 | 0.597012  | C                       | 4.645206  | -1.357399 | 4.396795  |
| H | -4.223338 | -7.015403 | 1.997404  | N                       | 3.913708  | -1.142285 | 5.523277  |
| H | -5.987173 | -5.317689 | 2.440832  | N                       | 5.917033  | -1.513522 | 4.859801  |
| C | -1.702202 | -4.055575 | -0.613436 | C                       | 7.030186  | -1.879856 | 4.025538  |
| H | -1.116518 | -4.957999 | -0.823490 | C                       | 7.504813  | -3.197225 | 4.101855  |
|   |           |           |           | C                       | 7.573427  | -0.916581 | 3.154692  |

|   |           |           |          |    |           |           |           |
|---|-----------|-----------|----------|----|-----------|-----------|-----------|
| C | 8.579967  | -3.542394 | 3.274670 | H  | 5.835055  | -6.132132 | 4.918425  |
| C | 8.635488  | -1.316627 | 2.339229 | C  | 7.051021  | 0.514815  | 3.140230  |
| C | 9.135869  | -2.617027 | 2.399276 | H  | 5.965414  | 0.469253  | 3.267735  |
| H | 8.967705  | -4.556043 | 3.304263 | C  | 7.618340  | 1.310587  | 4.330939  |
| H | 9.079393  | -0.607754 | 1.649445 | H  | 7.364761  | 0.838464  | 5.284978  |
| H | 9.960353  | -2.907768 | 1.754382 | H  | 8.710625  | 1.377343  | 4.264175  |
| C | 2.488843  | -0.939877 | 5.521972 | H  | 7.212989  | 2.329278  | 4.339497  |
| C | 2.002602  | 0.341560  | 5.837338 | C  | 7.314151  | 1.253733  | 1.822822  |
| C | 1.655854  | -2.026832 | 5.190727 | H  | 8.380458  | 1.458488  | 1.673403  |
| C | 0.615879  | 0.523138  | 5.824781 | H  | 6.951660  | 0.681252  | 0.962897  |
| C | 0.278669  | -1.782091 | 5.181787 | H  | 6.796568  | 2.219367  | 1.831636  |
| C | -0.235078 | -0.527506 | 5.496844 | Ni | 4.070249  | -1.504738 | 2.467159  |
| H | 0.197348  | 1.494578  | 6.062702 | H  | 2.450010  | 0.394066  | -0.422080 |
| H | -0.402130 | -2.580889 | 4.914890 | H  | 4.345187  | 0.537160  | 1.258724  |
| H | -1.309269 | -0.365988 | 5.478144 | C  | 3.693472  | -5.195858 | -3.625127 |
| C | 2.223856  | -3.408999 | 4.879599 | C  | 3.903726  | -4.175017 | -2.699521 |
| H | 3.063720  | -3.290457 | 4.188056 | C  | 4.383668  | -2.921598 | -3.105958 |
| C | 1.227561  | -4.335490 | 4.173861 | C  | 4.640999  | -2.719080 | -4.466426 |
| H | 0.401152  | -4.634917 | 4.830983 | C  | 4.431584  | -3.737871 | -5.397972 |
| H | 0.810195  | -3.861894 | 3.281367 | C  | 3.957329  | -4.981374 | -4.979894 |
| H | 1.748115  | -5.246116 | 3.860675 | H  | 3.325787  | -6.161303 | -3.287485 |
| C | 2.754598  | -4.091102 | 6.156062 | H  | 3.695357  | -4.349807 | -1.648645 |
| H | 3.527104  | -3.497485 | 6.652821 | H  | 5.012880  | -1.752196 | -4.798127 |
| H | 1.942717  | -4.260282 | 6.874466 | H  | 4.640727  | -3.559390 | -6.449493 |
| H | 3.193753  | -5.062556 | 5.902135 | H  | 3.795585  | -5.776944 | -5.702001 |
| C | 2.951786  | 1.500418  | 6.131579 | C  | 4.584753  | -1.811997 | -2.099752 |
| H | 3.809366  | 1.105593  | 6.685326 | H  | 5.190973  | -2.182504 | -1.265837 |
| C | 3.507099  | 2.104510  | 4.827812 | H  | 5.153837  | -0.995750 | -2.564032 |
| H | 4.243935  | 2.885291  | 5.050481 | C  | 3.254260  | -1.252906 | -1.564074 |
| H | 3.991649  | 1.342462  | 4.211406 | H  | 2.686651  | -2.053811 | -1.079656 |
| H | 2.699489  | 2.555722  | 4.240171 | H  | 2.648945  | -0.921522 | -2.417434 |
| C | 2.327895  | 2.597916  | 7.003938 | C  | 3.422825  | -0.075592 | -0.597598 |
| H | 1.544549  | 3.147169  | 6.469559 | H  | 4.045744  | 0.685702  | -1.095171 |
| H | 1.889003  | 2.185497  | 7.918796 | C  | 4.091492  | -0.394811 | 0.739844  |
| H | 3.095301  | 3.325325  | 7.290021 | H  | 5.013989  | -0.973316 | 0.577292  |
| C | 6.892415  | -4.238825 | 5.027103 | C  | 2.361677  | -0.980092 | 1.782304  |
| H | 6.056925  | -3.778555 | 5.559219 | C  | 1.731851  | 0.200904  | 2.208916  |
| C | 7.910719  | -4.707588 | 6.080172 | C  | 1.560147  | -2.034321 | 1.308248  |
| H | 8.767872  | -5.205231 | 5.612171 | C  | 0.341380  | 0.306096  | 2.215333  |
| H | 8.297699  | -3.867010 | 6.668842 | H  | 2.329257  | 1.040925  | 2.545736  |
| H | 7.445268  | -5.421939 | 6.768826 | C  | 0.169104  | -1.920385 | 1.311149  |
| C | 6.301343  | -5.413296 | 4.233300 | H  | 2.021667  | -2.953251 | 0.968203  |
| H | 5.548494  | -5.028888 | 3.541336 | C  | -0.448645 | -0.752654 | 1.764311  |
| H | 7.072559  | -5.946074 | 3.663878 | H  | -0.123388 | 1.218977  | 2.578148  |

|   |           |           |           |
|---|-----------|-----------|-----------|
| H | -0.433190 | -2.753245 | 0.956032  |
| H | -1.531597 | -0.667786 | 1.761355  |
| O | 4.555019  | -3.342841 | 2.330288  |
| C | 4.562896  | -3.967039 | 1.083841  |
| H | 4.022256  | -3.350223 | 0.338022  |
| C | 3.833007  | -5.317567 | 1.154429  |
| H | 2.807786  | -5.172119 | 1.512557  |
| H | 3.795474  | -5.818215 | 0.177671  |
| H | 4.341852  | -5.985995 | 1.858375  |
| C | 5.999312  | -4.133472 | 0.563801  |
| H | 6.508684  | -3.163044 | 0.555845  |
| H | 6.568235  | -4.792198 | 1.228611  |
| H | 6.023694  | -4.553303 | -0.450319 |

**BP1**

|   |           |           |           |
|---|-----------|-----------|-----------|
| O | -0.093291 | 0.379344  | 0.337456  |
| C | -1.019453 | 0.029918  | 1.042820  |
| C | -1.775971 | -1.263164 | 0.790133  |
| H | -2.838512 | -1.055526 | 0.611918  |
| H | -1.353114 | -1.777883 | -0.074540 |
| H | -1.723517 | -1.916086 | 1.670294  |
| C | -1.484567 | 0.862203  | 2.225672  |
| H | -1.408584 | 0.282570  | 3.154173  |
| H | -0.876473 | 1.765032  | 2.306482  |
| H | -2.540190 | 1.137477  | 2.108937  |

**Cl**

|    |          |          |          |
|----|----------|----------|----------|
| Cl | 0.000000 | 0.000000 | 0.000000 |
|----|----------|----------|----------|

**HOTf**

|   |           |           |           |
|---|-----------|-----------|-----------|
| H | -0.077231 | -0.334926 | 0.085746  |
| S | -2.009811 | -0.648626 | -0.784682 |
| O | -3.308498 | -0.240822 | -0.294044 |
| O | -1.382266 | -0.097362 | -1.976737 |
| O | -0.957268 | -0.539992 | 0.457241  |
| C | -2.038442 | -2.504071 | -0.980185 |
| F | -2.504906 | -3.068858 | 0.127651  |
| F | -2.823802 | -2.805929 | -2.009953 |
| F | -0.797717 | -2.934413 | -1.218021 |

**[(IPr)NiCl]<sub>2</sub>**

|    |           |           |          |
|----|-----------|-----------|----------|
| C  | 2.846007  | 10.429711 | 5.773207 |
| C  | 1.568660  | 10.758776 | 5.449004 |
| H  | 3.578057  | 10.927765 | 6.388693 |
| H  | 0.955409  | 11.601387 | 5.725953 |
| C  | 2.046694  | 8.784500  | 4.407031 |
| N  | 1.100263  | 9.749311  | 4.611931 |
| N  | 3.117574  | 9.222251  | 5.135030 |
| C  | 4.332437  | 8.460088  | 5.229340 |
| C  | 4.557628  | 7.709727  | 6.397721 |
| C  | 5.191812  | 8.418982  | 4.119454 |
| C  | 5.701527  | 6.907778  | 6.438519 |
| C  | 6.322134  | 7.598756  | 4.210468 |
| C  | 6.575162  | 6.850145  | 5.354857 |
| H  | 5.901977  | 6.305856  | 7.318585 |
| H  | 7.003013  | 7.538185  | 3.366899 |
| H  | 7.452415  | 6.210782  | 5.400928 |
| C  | -0.186894 | 9.696938  | 3.974596 |
| C  | -0.406215 | 10.513976 | 2.850604 |
| C  | -1.132945 | 8.768365  | 4.438147 |
| C  | -1.632314 | 10.388413 | 2.191617 |
| C  | -2.343833 | 8.680586  | 3.741953 |
| C  | -2.591944 | 9.478851  | 2.630536 |
| H  | -1.832412 | 10.993400 | 1.313559 |
| H  | -3.093883 | 7.967343  | 4.069909 |
| H  | -3.533970 | 9.387003  | 2.097036 |
| Ni | 1.910663  | 7.229802  | 3.370929 |
| C  | 4.929291  | 9.204936  | 2.843608 |
| H  | 3.999028  | 9.763781  | 2.971808 |
| C  | 4.735871  | 8.266200  | 1.640194 |
| H  | 4.495499  | 8.843221  | 0.739949 |
| H  | 5.640856  | 7.683869  | 1.434413 |
| H  | 3.917847  | 7.560978  | 1.818920 |
| C  | 6.048341  | 10.227588 | 2.581958 |
| H  | 5.820037  | 10.819210 | 1.687760 |
| H  | 6.165074  | 10.914715 | 3.427820 |
| H  | 7.012627  | 9.732790  | 2.417514 |
| C  | 3.551745  | 7.695644  | 7.541616 |
| H  | 2.962313  | 8.616022  | 7.489122 |
| C  | 2.570710  | 6.519219  | 7.376664 |
| H  | 1.819190  | 6.536129  | 8.175812 |
| H  | 2.060861  | 6.558636  | 6.411288 |
| H  | 3.103497  | 5.562710  | 7.423515 |
| C  | 4.217711  | 7.668267  | 8.925301 |

|   |           |           |           |    |           |           |           |
|---|-----------|-----------|-----------|----|-----------|-----------|-----------|
| H | 3.458124  | 7.778154  | 9.707396  | C  | -1.910291 | 2.601908  | 4.452377  |
| H | 4.736874  | 6.721160  | 9.109577  | H  | -0.446936 | 1.345402  | 5.397684  |
| H | 4.945897  | 8.479423  | 9.037338  | H  | -3.170347 | 3.911545  | 3.311245  |
| C | 0.679337  | 11.437191 | 2.312243  | H  | -2.594288 | 2.565276  | 5.295894  |
| H | 1.370916  | 11.663712 | 3.129340  | Ni | 1.744449  | 5.335821  | 2.101353  |
| C | 1.492447  | 10.724444 | 1.214833  | C  | 4.947266  | 3.484122  | 1.214063  |
| H | 0.851972  | 10.472095 | 0.362123  | H  | 4.022568  | 3.315330  | 1.772233  |
| H | 2.301934  | 11.374019 | 0.859183  | C  | 5.937818  | 4.123044  | 2.196318  |
| H | 1.924294  | 9.790856  | 1.582619  | H  | 6.035425  | 3.487068  | 3.082778  |
| C | 0.128540  | 12.778797 | 1.806550  | H  | 6.938443  | 4.233194  | 1.760413  |
| H | -0.483995 | 13.274814 | 2.567820  | H  | 5.583348  | 5.101558  | 2.530246  |
| H | 0.956378  | 13.446640 | 1.543130  | C  | 5.456768  | 2.117896  | 0.718403  |
| H | -0.485543 | 12.655027 | 0.907638  | H  | 5.668822  | 1.457026  | 1.567172  |
| C | -0.882090 | 7.862964  | 5.634796  | H  | 4.716637  | 1.622830  | 0.080449  |
| H | 0.116551  | 8.078257  | 6.022913  | H  | 6.379913  | 2.234026  | 0.137685  |
| C | -1.886567 | 8.146335  | 6.764911  | C  | 1.574255  | 5.189394  | -2.220115 |
| H | -1.850198 | 9.196820  | 7.075378  | H  | 0.937888  | 4.588047  | -1.564814 |
| H | -2.913808 | 7.925354  | 6.452415  | C  | 0.968713  | 6.601844  | -2.256426 |
| H | -1.661703 | 7.522221  | 7.637632  | H  | -0.069373 | 6.553820  | -2.606113 |
| C | -0.902361 | 6.379891  | 5.226139  | H  | 0.976936  | 7.052380  | -1.259978 |
| H | -1.885323 | 6.080189  | 4.845810  | H  | 1.516916  | 7.260404  | -2.940144 |
| H | -0.164643 | 6.178529  | 4.442915  | C  | 1.561671  | 4.535096  | -3.612550 |
| H | -0.666118 | 5.743341  | 6.086489  | H  | 0.543017  | 4.507526  | -4.016577 |
| C | 1.948027  | 2.234145  | -0.569141 | H  | 2.189280  | 5.095841  | -4.315309 |
| C | 0.934326  | 1.786409  | 0.216949  | H  | 1.941653  | 3.507795  | -3.573373 |
| H | 2.414970  | 1.810684  | -1.443715 | C  | 1.535171  | 1.239116  | 3.524166  |
| H | 0.345965  | 0.883766  | 0.179942  | H  | 2.132948  | 1.533167  | 2.656966  |
| C | 1.605929  | 3.798349  | 1.054923  | C  | 2.322371  | 1.664911  | 4.774243  |
| N | 0.740303  | 2.754832  | 1.200356  | H  | 1.814607  | 1.357298  | 5.695830  |
| N | 2.344074  | 3.461739  | -0.041224 | H  | 3.313440  | 1.195777  | 4.770118  |
| C | 3.341713  | 4.347581  | -0.575266 | H  | 2.453513  | 2.750396  | 4.797959  |
| C | 2.978581  | 5.191660  | -1.636062 | C  | 1.349029  | -0.286808 | 3.466190  |
| C | 4.609971  | 4.384401  | 0.033929  | H  | 0.835380  | -0.590358 | 2.546724  |
| C | 3.957523  | 6.056544  | -2.138900 | H  | 2.319702  | -0.795059 | 3.499354  |
| C | 5.549714  | 5.270754  | -0.500235 | H  | 0.752245  | -0.642985 | 4.314182  |
| C | 5.231255  | 6.092048  | -1.580727 | C  | -1.725521 | 4.249331  | 0.995966  |
| H | 3.711888  | 6.718745  | -2.963397 | H  | -0.786265 | 4.597458  | 0.558157  |
| H | 6.538782  | 5.329193  | -0.059537 | C  | -2.439058 | 3.372348  | -0.049833 |
| H | 5.977498  | 6.774891  | -1.977657 | H  | -1.820704 | 2.517165  | -0.343277 |
| C | -0.179876 | 2.690675  | 2.302236  | H  | -3.385205 | 2.984994  | 0.347268  |
| C | 0.195567  | 1.953776  | 3.435927  | H  | -2.660970 | 3.955306  | -0.951514 |
| C | -1.377161 | 3.427091  | 2.228667  | C  | -2.545677 | 5.504822  | 1.319956  |
| C | -0.704271 | 1.910936  | 4.507289  | H  | -3.557199 | 5.259177  | 1.666307  |
| C | -2.237810 | 3.358414  | 3.328064  | H  | -2.046581 | 6.115042  | 2.076941  |

|    |           |          |          |
|----|-----------|----------|----------|
| H  | -2.648299 | 6.117572 | 0.417898 |
| Cl | 0.666042  | 7.185806 | 1.513091 |
| Cl | 2.986746  | 5.353744 | 3.942331 |

**(IPr)]NiCl**

|   |           |           |           |
|---|-----------|-----------|-----------|
| C | 1.096506  | -0.533975 | 0.024055  |
| C | 1.753875  | 0.653501  | -0.033603 |
| H | 1.449964  | -1.552210 | 0.000762  |
| H | 2.802238  | 0.890423  | -0.117765 |
| C | -0.470956 | 1.116433  | 0.140424  |
| N | 0.782253  | 1.644809  | 0.038318  |
| N | -0.255743 | -0.230259 | 0.130250  |
| C | -1.321829 | -1.190571 | 0.217389  |
| C | -1.723321 | -1.628743 | 1.490170  |
| C | -1.942564 | -1.608712 | -0.971032 |
| C | -2.782879 | -2.539819 | 1.550126  |
| C | -2.997371 | -2.520465 | -0.857261 |
| C | -3.411602 | -2.983431 | 0.389101  |
| H | -3.127637 | -2.894512 | 2.516390  |
| H | -3.507189 | -2.860358 | -1.753387 |
| H | -4.236756 | -3.686616 | 0.456989  |
| C | 1.030381  | 3.060360  | 0.007558  |
| C | 1.035429  | 3.709976  | -1.237898 |
| C | 1.207277  | 3.734215  | 1.227027  |
| C | 1.247135  | 5.092556  | -1.239275 |
| C | 1.415574  | 5.116355  | 1.171736  |
| C | 1.438053  | 5.788311  | -0.047866 |
| H | 1.248512  | 5.631067  | -2.181811 |
| H | 1.547960  | 5.672924  | 2.094325  |
| H | 1.594893  | 6.862969  | -0.069430 |
| C | 1.127991  | 3.015982  | 2.565364  |
| H | 1.053979  | 1.941794  | 2.371169  |
| C | -0.143800 | 3.431480  | 3.326285  |
| H | -0.125406 | 4.499680  | 3.570901  |
| H | -1.040729 | 3.239748  | 2.728262  |
| H | -0.228093 | 2.869718  | 4.263813  |
| C | 2.390420  | 3.242997  | 3.412588  |
| H | 3.292318  | 2.929878  | 2.874830  |
| H | 2.510493  | 4.298291  | 3.681766  |
| H | 2.329638  | 2.669166  | 4.344155  |
| C | 0.766112  | 2.964985  | -2.536355 |
| H | 0.752383  | 1.893075  | -2.316970 |
| C | -0.621025 | 3.336370  | -3.091096 |

|    |           |           |           |
|----|-----------|-----------|-----------|
| H  | -0.837569 | 2.757855  | -3.996734 |
| H  | -1.406786 | 3.132639  | -2.356269 |
| H  | -0.669531 | 4.400838  | -3.347620 |
| C  | 1.870675  | 3.204630  | -3.577983 |
| H  | 1.914897  | 4.255448  | -3.884981 |
| H  | 2.855517  | 2.928601  | -3.184940 |
| H  | 1.679549  | 2.606649  | -4.476093 |
| C  | -1.082274 | -1.098458 | 2.763506  |
| H  | -0.202887 | -0.511130 | 2.482429  |
| C  | -0.600307 | -2.231763 | 3.683068  |
| H  | -1.436069 | -2.838786 | 4.048267  |
| H  | 0.095893  | -2.898606 | 3.162289  |
| H  | -0.088062 | -1.816279 | 4.558090  |
| C  | -2.049728 | -0.151497 | 3.496504  |
| H  | -2.363464 | 0.671659  | 2.846212  |
| H  | -2.950656 | -0.684743 | 3.820872  |
| H  | -1.568085 | 0.274697  | 4.384290  |
| C  | -1.531882 | -1.066250 | -2.331342 |
| H  | -0.641624 | -0.444933 | -2.195456 |
| C  | -1.159704 | -2.193749 | -3.307776 |
| H  | -0.360895 | -2.824407 | -2.901773 |
| H  | -2.018492 | -2.838979 | -3.523998 |
| H  | -0.814741 | -1.772723 | -4.258848 |
| C  | -2.635962 | -0.162500 | -2.908665 |
| H  | -3.556408 | -0.729905 | -3.087640 |
| H  | -2.874584 | 0.655933  | -2.221553 |
| H  | -2.313643 | 0.271340  | -3.862340 |
| Ni | -2.111185 | 2.031938  | 0.263633  |
| Cl | -3.974998 | 3.072598  | 0.402015  |

**(IPr)]NiOi-Pr (2CAT1)**

|   |           |           |           |
|---|-----------|-----------|-----------|
| C | 1.095228  | -0.543903 | 0.045975  |
| C | 1.772805  | 0.632341  | 0.005176  |
| H | 1.432897  | -1.567166 | 0.009307  |
| H | 2.825117  | 0.852526  | -0.075440 |
| C | -0.445326 | 1.132089  | 0.183218  |
| N | 0.816389  | 1.641319  | 0.089194  |
| N | -0.251654 | -0.220514 | 0.160635  |
| C | -1.338884 | -1.160950 | 0.225250  |
| C | -1.705264 | -1.672357 | 1.481581  |
| C | -2.020071 | -1.482556 | -0.959982 |
| C | -2.777587 | -2.568927 | 1.524947  |
| C | -3.083893 | -2.386138 | -0.864024 |

C -3.456589 -2.927640 0.362790  
 H -3.095184 -2.976686 2.479288  
 H -3.634122 -2.655468 -1.759994  
 H -4.291397 -3.620638 0.416640  
 C 1.084892 3.050830 0.023623  
 C 1.099568 3.666983 -1.239342  
 C 1.272701 3.754884 1.223953  
 C 1.318806 5.048018 -1.276697  
 C 1.488369 5.134323 1.133370  
 C 1.512018 5.774017 -0.103523  
 H 1.327857 5.561766 -2.232702  
 H 1.629016 5.714047 2.040220  
 H 1.676388 6.846734 -0.153523  
 C 1.185197 3.065729 2.577045  
 H 1.209896 1.984759 2.408024  
 C -0.157660 3.393303 3.255088  
 H -0.244207 4.468420 3.451155  
 H -0.998905 3.095403 2.619930  
 H -0.245311 2.863024 4.210462  
 C 2.371952 3.414140 3.488892  
 H 3.327547 3.186413 3.003872  
 H 2.377708 4.475567 3.760516  
 H 2.313463 2.838259 4.419236  
 C 0.829659 2.883852 -2.515836  
 H 0.911010 1.817709 -2.282703  
 C -0.607764 3.136779 -3.006925  
 H -0.814638 2.543695 -3.905389  
 H -1.339648 2.861664 -2.239714  
 H -0.755046 4.194621 -3.254332  
 C 1.857861 3.187622 -3.616735  
 H 1.788754 4.224835 -3.962895  
 H 2.881715 3.017787 -3.265517  
 H 1.680647 2.541437 -4.483597  
 C -1.031238 -1.202871 2.761638  
 H -0.098807 -0.698237 2.489821  
 C -0.665856 -2.361554 3.701350  
 H -1.556857 -2.874806 4.079468  
 H -0.039930 -3.104488 3.194634  
 H -0.114434 -1.982779 4.569246  
 C -1.925026 -0.165842 3.467364  
 H -2.152116 0.669055 2.796278  
 H -2.875090 -0.617006 3.775901  
 H -1.426552 0.229504 4.360549  
 C -1.649277 -0.873020 -2.302592

H -0.888649 -0.107152 -2.128269  
 C -1.036150 -1.931244 -3.235582  
 H -0.146175 -2.389470 -2.788595  
 H -1.753186 -2.732409 -3.449465  
 H -0.745255 -1.477383 -4.190032  
 C -2.855368 -0.170734 -2.949617  
 H -3.628588 -0.892489 -3.239121  
 H -3.300563 0.552291 -2.258726  
 H -2.537964 0.353990 -3.858553  
 Ni -2.166923 1.886616 0.203776  
 O -3.913885 1.749437 -0.160542  
 C -4.786183 0.980687 0.635735  
 H -4.257022 0.102587 1.049104  
 C -5.927590 0.456492 -0.241663  
 H -6.478794 1.296690 -0.680849  
 H -5.522048 -0.149883 -1.058151  
 H -6.629190 -0.160819 0.334423  
 C -5.316966 1.802197 1.815502  
 H -6.003324 1.217703 2.442731  
 H -4.482822 2.146208 2.438724  
 H -5.848986 2.686925 1.445509

**<sup>4</sup>CAT1**

C 0.795608 -0.492415 0.319760  
 C 1.473433 0.670787 0.156395  
 H 1.127524 -1.517902 0.326317  
 H 2.518072 0.871576 -0.018783  
 C -0.727692 1.207199 0.476539  
 N 0.536593 1.692586 0.247080  
 N -0.544217 -0.154368 0.498509  
 C -1.605262 -1.119081 0.578897  
 C -2.040742 -1.541172 1.844982  
 C -2.145195 -1.620542 -0.621028  
 C -3.033134 -2.527763 1.891372  
 C -3.129042 -2.608831 -0.521107  
 C -3.565872 -3.061739 0.721803  
 H -3.389644 -2.880378 2.853822  
 H -3.565871 -3.022092 -1.424123  
 H -4.334510 -3.827370 0.777867  
 C 0.822535 3.091688 0.112821  
 C 0.569988 3.708881 -1.124589  
 C 1.322929 3.787706 1.227215  
 C 0.836462 5.078175 -1.228572

|   |           |           |           |
|---|-----------|-----------|-----------|
| C | 1.590165  | 5.151798  | 1.066613  |
| C | 1.344914  | 5.791536  | -0.145612 |
| H | 0.645630  | 5.590348  | -2.166299 |
| H | 1.984230  | 5.720038  | 1.903067  |
| H | 1.549660  | 6.853707  | -0.246927 |
| C | 1.608029  | 3.088178  | 2.547483  |
| H | 1.112254  | 2.113044  | 2.523622  |
| C | 1.031983  | 3.851088  | 3.749596  |
| H | 1.507311  | 4.829945  | 3.881280  |
| H | -0.046094 | 3.998638  | 3.627343  |
| H | 1.197513  | 3.277458  | 4.668782  |
| C | 3.119971  | 2.848922  | 2.712990  |
| H | 3.525631  | 2.257866  | 1.884118  |
| H | 3.665533  | 3.799426  | 2.741676  |
| H | 3.324790  | 2.312192  | 3.646417  |
| C | -0.004887 | 2.934000  | -2.300260 |
| H | 0.095326  | 1.866924  | -2.079037 |
| C | -1.506089 | 3.233552  | -2.454394 |
| H | -1.942161 | 2.619874  | -3.251726 |
| H | -2.043430 | 3.024524  | -1.526355 |
| H | -1.667907 | 4.287675  | -2.709536 |
| C | 0.755909  | 3.199432  | -3.608470 |
| H | 0.645075  | 4.237502  | -3.940900 |
| H | 1.826253  | 2.994194  | -3.496780 |
| H | 0.364824  | 2.557677  | -4.406057 |
| C | -1.431642 | -0.988768 | 3.124185  |
| H | -0.875708 | -0.080971 | 2.869545  |
| C | -0.433779 | -1.997254 | 3.720941  |
| H | -0.935599 | -2.934036 | 3.990794  |
| H | 0.362142  | -2.237130 | 3.006757  |
| H | 0.031208  | -1.588137 | 4.625191  |
| C | -2.499810 | -0.580539 | 4.149401  |
| H | -3.200377 | 0.140555  | 3.715326  |
| H | -3.070880 | -1.442456 | 4.513367  |
| H | -2.023216 | -0.108688 | 5.015600  |
| C | -1.655078 | -1.136711 | -1.979123 |
| H | -1.205403 | -0.149297 | -1.834685 |
| C | -0.567297 | -2.076902 | -2.532351 |
| H | 0.287295  | -2.148470 | -1.853235 |
| H | -0.969011 | -3.086586 | -2.677597 |
| H | -0.201483 | -1.713692 | -3.499795 |
| C | -2.786782 | -0.976242 | -3.006002 |
| H | -3.208296 | -1.943383 | -3.302281 |
| H | -3.598207 | -0.356065 | -2.615998 |

|    |           |           |           |
|----|-----------|-----------|-----------|
| H  | -2.397802 | -0.500091 | -3.912973 |
| Ni | -2.149205 | 2.274427  | 1.440206  |
| O  | -3.750628 | 2.309076  | 0.629490  |
| C  | -4.227747 | 1.529155  | -0.440189 |
| H  | -3.372380 | 1.105188  | -0.991596 |
| C  | -5.031212 | 2.414266  | -1.396767 |
| H  | -5.894711 | 2.840888  | -0.873944 |
| H  | -4.415113 | 3.240066  | -1.765676 |
| H  | -5.394604 | 1.838351  | -2.257523 |
| C  | -5.072284 | 0.374489  | 0.105005  |
| H  | -5.434912 | -0.272110 | -0.703690 |
| H  | -4.483052 | -0.235759 | 0.794281  |
| H  | -5.937326 | 0.772488  | 0.648039  |

**NaO*i*Pr**

|   |           |           |           |
|---|-----------|-----------|-----------|
| O | 0.874979  | -0.194830 | -0.019979 |
| C | 1.083924  | -0.039716 | -1.311349 |
| H | 1.163683  | 1.051606  | -1.689731 |
| C | -0.066770 | -0.635022 | -2.203135 |
| H | -1.018304 | -0.178535 | -1.897207 |
| H | 0.062596  | -0.479065 | -3.291095 |
| H | -0.147007 | -1.716779 | -2.011062 |
| C | 2.433790  | -0.679260 | -1.803800 |
| H | 2.655220  | -0.524623 | -2.877005 |
| H | 3.257830  | -0.254386 | -1.214037 |
| H | 2.412813  | -1.762129 | -1.602604 |

**<sup>•</sup>O*i*Pr**

|   |           |           |           |
|---|-----------|-----------|-----------|
| O | 0.874979  | -0.194830 | -0.019979 |
| C | 1.083924  | -0.039716 | -1.311349 |
| H | 1.163683  | 1.051606  | -1.689731 |
| C | -0.066770 | -0.635022 | -2.203135 |
| H | -1.018304 | -0.178535 | -1.897207 |
| H | 0.062596  | -0.479065 | -3.291095 |
| H | -0.147007 | -1.716779 | -2.011062 |
| C | 2.433790  | -0.679260 | -1.803800 |
| H | 2.655220  | -0.524623 | -2.877005 |
| H | 3.257830  | -0.254386 | -1.214037 |
| H | 2.412813  | -1.762129 | -1.602604 |

**<sup>•</sup>OTf**

|   |           |          |           |
|---|-----------|----------|-----------|
| O | -0.766821 | 0.279633 | -0.002299 |
|---|-----------|----------|-----------|

|   |           |           |           |
|---|-----------|-----------|-----------|
| S | -0.914580 | -1.001662 | 0.724810  |
| O | -0.206252 | -2.158040 | 0.130561  |
| O | -0.858611 | -0.908105 | 2.201231  |
| C | -2.702924 | -1.428955 | 0.418708  |
| F | -2.970228 | -1.561777 | -0.899478 |
| F | -3.051469 | -2.593326 | 1.011185  |
| F | -3.536891 | -0.478424 | 0.896407  |

**PI**

|   |           |           |           |
|---|-----------|-----------|-----------|
| C | -2.419768 | 0.226335  | -0.181145 |
| C | -2.724511 | -0.050849 | 1.158795  |
| C | -3.235624 | -0.327947 | -1.173307 |
| C | -3.811176 | -0.856441 | 1.494805  |
| H | -2.105853 | 0.366458  | 1.948909  |
| C | -4.325438 | -1.134974 | -0.843231 |
| H | -3.013183 | -0.123280 | -2.218135 |
| C | -4.617228 | -1.402273 | 0.493889  |
| H | -4.029355 | -1.058915 | 2.539994  |
| H | -4.945545 | -1.553597 | -1.631390 |
| H | -5.464625 | -2.029888 | 0.755162  |
| H | -2.324040 | 2.953246  | -0.238212 |
| C | 4.219824  | -1.406818 | -0.780811 |
| C | 3.094315  | -0.661742 | -1.131326 |
| C | 2.609513  | 0.348006  | -0.291126 |
| C | 3.281459  | 0.592678  | 0.912410  |
| C | 4.407339  | -0.149595 | 1.268747  |
| C | 4.880536  | -1.152973 | 0.422152  |
| H | 4.583230  | -2.183333 | -1.448556 |
| H | 2.583782  | -0.862278 | -2.070748 |
| H | 2.917850  | 1.375648  | 1.574366  |
| H | 4.917296  | 0.058172  | 2.205618  |
| H | 5.759127  | -1.730339 | 0.695924  |
| C | 1.358478  | 1.115948  | -0.647178 |
| H | 1.415266  | 2.123904  | -0.221137 |
| H | 1.291675  | 1.236493  | -1.736680 |
| C | 0.089235  | 0.405285  | -0.143539 |
| H | 0.136746  | 0.319304  | 0.950195  |
| H | 0.084697  | -0.621986 | -0.528289 |
| C | -1.229690 | 1.094042  | -0.552217 |
| H | -1.223694 | 1.188654  | -1.647360 |
| C | -1.362136 | 2.508779  | 0.037096  |
| H | -1.305706 | 2.487059  | 1.131802  |
| H | -0.568447 | 3.169916  | -0.325560 |

**PI'**

|   |           |           |           |
|---|-----------|-----------|-----------|
| H | -0.530091 | 0.130910  | 0.088298  |
| H | 0.592437  | -0.879307 | 1.991524  |
| C | -0.934772 | -4.906318 | -4.004104 |
| C | -0.460233 | -4.188056 | -2.908196 |
| C | 0.477749  | -3.159559 | -3.075261 |
| C | 0.925727  | -2.868232 | -4.367677 |
| C | 0.453525  | -3.585142 | -5.468494 |
| C | -0.478528 | -4.607174 | -5.289885 |
| H | -1.659793 | -5.702203 | -3.855429 |
| H | -0.820245 | -4.420864 | -1.908266 |
| H | 1.653736  | -2.072979 | -4.511749 |
| H | 0.816024  | -3.345944 | -6.464727 |
| H | -0.846094 | -5.167919 | -6.144806 |
| C | 0.947585  | -2.365000 | -1.879845 |
| H | 1.175986  | -3.054869 | -1.059654 |
| H | 1.881729  | -1.839906 | -2.117275 |
| C | -0.109017 | -1.348047 | -1.412965 |
| H | -1.061163 | -1.871388 | -1.267125 |
| H | -0.278076 | -0.622015 | -2.218337 |
| C | 0.257662  | -0.603512 | -0.123989 |
| H | 1.183587  | -0.030528 | -0.269899 |
| C | 0.431971  | -1.515378 | 1.111356  |
| H | 1.338651  | -2.120822 | 1.001804  |
| C | -0.752402 | -2.426971 | 1.343333  |
| C | -1.995315 | -1.900560 | 1.720078  |
| C | -0.651990 | -3.808828 | 1.143957  |
| C | -3.105203 | -2.727753 | 1.883750  |
| H | -2.092919 | -0.829973 | 1.885262  |
| C | -1.760112 | -4.642760 | 1.305229  |
| H | 0.306691  | -4.237561 | 0.862531  |
| C | -2.992480 | -4.103639 | 1.673209  |
| H | -4.059480 | -2.298858 | 2.177448  |
| H | -1.657629 | -5.712873 | 1.146291  |
| H | -3.857112 | -4.749014 | 1.799394  |

**SP-alkene**

|   |           |          |           |
|---|-----------|----------|-----------|
| C | -2.086318 | 0.790278 | 0.190691  |
| H | -3.034987 | 0.317376 | 0.429908  |
| H | -1.195807 | 0.194385 | 0.361871  |
| C | -3.343847 | 2.749311 | -0.629764 |



|   |           |          |           |
|---|-----------|----------|-----------|
| H | -3.229630 | 3.832973 | -0.517621 |
| H | -4.112615 | 2.443454 | 0.088240  |
| C | -0.763680 | 2.720954 | -0.619071 |
| C | -0.706349 | 3.785456 | -1.534959 |
| C | 0.435595  | 2.339563 | 0.009888  |
| C | 0.498868  | 4.420106 | -1.832605 |
| H | -1.609175 | 4.121404 | -2.032505 |
| C | 1.639134  | 2.972268 | -0.284332 |
| H | 0.418312  | 1.555702 | 0.760039  |
| C | 1.679512  | 4.015124 | -1.212412 |
| H | 0.511643  | 5.234920 | -2.551312 |
| H | 2.547715  | 2.658664 | 0.222458  |
| H | 2.618262  | 4.512239 | -1.439324 |
| C | -3.866384 | 2.435711 | -2.054334 |
| H | -4.053144 | 1.357718 | -2.119833 |
| H | -3.087439 | 2.660446 | -2.791332 |
| C | -2.044860 | 2.033914 | -0.312262 |
| C | -5.121548 | 3.209826 | -2.374805 |
| C | -6.379995 | 2.715774 | -2.010364 |
| C | -5.051654 | 4.464266 | -2.992700 |
| C | -7.537885 | 3.453046 | -2.256412 |
| H | -6.450384 | 1.741071 | -1.532486 |
| C | -6.206042 | 5.206515 | -3.241137 |
| H | -4.081551 | 4.859599 | -3.286592 |
| C | -7.454182 | 4.702514 | -2.872793 |
| H | -8.505919 | 3.050483 | -1.970577 |
| H | -6.131391 | 6.176187 | -3.725901 |
| H | -8.355125 | 5.277283 | -3.068005 |

**SP-bz**

|   |           |           |           |
|---|-----------|-----------|-----------|
| C | -1.213445 | -0.733449 | -0.017786 |
| C | -2.021809 | -0.014849 | 0.864621  |
| C | -0.301001 | -0.061546 | -0.833504 |
| C | -1.918021 | 1.375883  | 0.931612  |
| H | -2.732147 | -0.537541 | 1.499480  |
| C | -0.197179 | 1.328906  | -0.766561 |
| H | 0.327955  | -0.621054 | -1.520623 |
| C | -1.005765 | 2.047684  | 0.116079  |
| H | -2.547602 | 1.935151  | 1.618343  |
| H | 0.512979  | 1.852112  | -1.401127 |
| H | -0.924524 | 3.130009  | 0.168131  |
| H | -1.294156 | -1.815836 | -0.070196 |
